# Supplementary material for: Di-lanthanide encapsulated into large fullerene C100: a DFT survey
Source: Royal Society of Chemistry journal article supplement (doi:10.1039/c0cp01840f), 2011-01-01
Supplement: c0cp01840.pdf [file c0cp01840.pdf]

*Electronic Supplementary Information for:*

## Di-lanthanide Encapsulated into Large Fullerene C<sub>100</sub>: A DFT Survey<sup>†</sup>

Tao Yang,<sup>a</sup> Xiang Zhao,<sup>\*a</sup> and Shigeru Nagase<sup>b</sup>

---

<sup>a</sup> *Institute for Chemical Physics and Department of Chemistry, Xi'an Jiaotong University,  
Xi'an 710049, China.*

*Email: [xzhao@mail.xjtu.edu.cn](mailto:xzhao@mail.xjtu.edu.cn); Fax: +86 29 8266 8559; Tel: +86 29 8266 5671*

<sup>b</sup> *Department of Theoretical and Computational Molecular Science,  
Institute for Molecular Science, Okazaki 444-8585, Japan*

## 1. Optimized energies at AM1 level.

IPR (isolated pentagon rule)<sup>S1</sup> indicates that the more pentagon adjacency in fullerene, the less stable the fullerene is. Therefore all of isomers belonged to PA=0~2 are in consideration in our calculations. There are 450 IPR isomers, 4034 isomers of PA=1 and 20271 isomers belonged to PA=2.<sup>S2</sup> Semi-empirical calculations at the AM1<sup>S3</sup> level were performed on the hexa-anion of all these isomers using the PC MOPAC package.

**Table S1.** The C<sub>100</sub> isomers considered at hexa-anion state in AM1 calculations.

| C <sub>100</sub> | PA   | All number | non-C <sub>I</sub> | C <sub>I</sub> |
|------------------|------|------------|--------------------|----------------|
|                  | 0    | 450        | 116                | 334            |
|                  | 1    | 4034       | 94                 | 3940           |
|                  | 2    | 20271      | 772                | 19499          |
| SUM              | PA≤2 | 24755      | 982                | 23813          |

Thinking of about 25000 isomers are considered in AM1 calculations, here we only provide the optimized energy of all IPR isomers and PA=1~2 with relative energy below 100kcal/mol. Such a plan give rise to about 4400 isomers and the results are collected in Table S2. For all the optimized energies, please contact the authors.

**Table S2.** AM1 optimized energetics of all IPR isomers and non-IPR isomers (PA=1~2) with relative energy below 100kcal/mol at hexa-anion of C<sub>100</sub>.

---

|                  |            |            |                  |            |            |
|------------------|------------|------------|------------------|------------|------------|
| C <sub>100</sub> | Hexa-anion | Hexa-anion | C <sub>100</sub> | Hexa-anion | Hexa-anion |
|                  | AM1        | AM1        |                  | AM1        | AM1        |

| spiral ID | PA | Sym.     | $\Delta H_f$ | $\Delta\Delta H_f$ | spiral ID | PA | Sym.  | $\Delta H_f$ | $\Delta\Delta H_f$ |
|-----------|----|----------|--------------|--------------------|-----------|----|-------|--------------|--------------------|
|           |    |          | kcal/mol     | kcal/mol           |           |    |       | kcal/mol     | kcal/mol           |
| 285913    | 0  | $D_5$    | 1535.85      | 0.00               | 271216    | 2  | $C_1$ | 1626.01      | 90.16              |
| 285793    | 0  | $C_2$    | 1557.99      | 22.13              | 273275    | 1  | $C_1$ | 1626.01      | 90.16              |
| 285864    | 0  | $C_2$    | 1559.73      | 23.88              | 252446    | 2  | $C_1$ | 1626.02      | 90.16              |
| 285858    | 0  | $D_{2d}$ | 1564.11      | 28.26              | 285768    | 0  | $C_1$ | 1626.02      | 90.17              |
| 285868    | 0  | $C_1$    | 1568.15      | 32.29              | 268948    | 2  | $C_1$ | 1626.04      | 90.19              |
| 285813    | 0  | $C_2$    | 1569.99      | 34.13              | 270613    | 1  | $C_1$ | 1626.04      | 90.19              |
| 285800    | 0  | $C_1$    | 1571.35      | 35.50              | 253774    | 2  | $C_1$ | 1626.05      | 90.19              |
| 285857    | 0  | $C_s$    | 1571.89      | 36.04              | 224594    | 2  | $C_1$ | 1626.06      | 90.20              |
| 285845    | 0  | $C_1$    | 1572.50      | 36.65              | 247127    | 1  | $C_1$ | 1626.07      | 90.21              |
| 285859    | 0  | $C_2$    | 1572.57      | 36.71              | 263320    | 2  | $C_1$ | 1626.07      | 90.21              |
| 285865    | 0  | $C_2$    | 1572.93      | 37.08              | 252612    | 2  | $C_1$ | 1626.07      | 90.22              |
| 285816    | 0  | $C_1$    | 1574.87      | 39.01              | 265665    | 2  | $C_1$ | 1626.07      | 90.22              |
| 285902    | 0  | $C_2$    | 1575.98      | 40.12              | 203285    | 2  | $C_1$ | 1626.09      | 90.23              |
| 285590    | 0  | $C_s$    | 1576.06      | 40.20              | 282375    | 2  | $C_1$ | 1626.09      | 90.24              |
| 285910    | 0  | $C_s$    | 1576.07      | 40.21              | 267189    | 2  | $C_1$ | 1626.10      | 90.24              |
| 285903    | 0  | $C_2$    | 1577.70      | 41.85              | 276512    | 2  | $C_1$ | 1626.10      | 90.24              |
| 285847    | 0  | $C_1$    | 1578.89      | 43.04              | 272467    | 1  | $C_1$ | 1626.10      | 90.24              |
| 285678    | 0  | $C_1$    | 1579.08      | 43.22              | 237596    | 2  | $C_1$ | 1626.10      | 90.25              |
| 285833    | 0  | $C_1$    | 1579.25      | 43.40              | 270826    | 2  | $C_1$ | 1626.11      | 90.26              |
| 285807    | 0  | $C_1$    | 1579.27      | 43.42              | 282068    | 1  | $C_1$ | 1626.12      | 90.26              |

|        |   |       |         |       |        |   |       |         |       |
|--------|---|-------|---------|-------|--------|---|-------|---------|-------|
| 285402 | 1 | $C_2$ | 1579.71 | 43.86 | 285076 | 2 | $C_1$ | 1626.12 | 90.27 |
| 285809 | 0 | $C_1$ | 1579.75 | 43.90 | 276229 | 2 | $C_1$ | 1626.13 | 90.27 |
| 285911 | 0 | $C_2$ | 1579.87 | 44.02 | 265566 | 2 | $C_1$ | 1626.13 | 90.28 |
| 285832 | 0 | $C_1$ | 1579.89 | 44.03 | 283529 | 2 | $C_1$ | 1626.14 | 90.28 |
| 285844 | 0 | $C_2$ | 1580.26 | 44.40 | 266571 | 2 | $C_1$ | 1626.14 | 90.28 |
| 285905 | 0 | $C_2$ | 1580.59 | 44.74 | 275438 | 1 | $C_1$ | 1626.14 | 90.29 |
| 275176 | 1 | $C_1$ | 1580.95 | 45.09 | 283191 | 1 | $C_1$ | 1626.15 | 90.29 |
| 285904 | 0 | $C_1$ | 1581.06 | 45.20 | 264168 | 2 | $C_1$ | 1626.15 | 90.29 |
| 285843 | 0 | $C_1$ | 1582.27 | 46.42 | 229322 | 1 | $C_1$ | 1626.15 | 90.30 |
| 285841 | 0 | $C_2$ | 1582.36 | 46.51 | 203782 | 2 | $C_1$ | 1626.15 | 90.30 |
| 285641 | 0 | $C_1$ | 1582.45 | 46.60 | 265597 | 2 | $C_1$ | 1626.16 | 90.30 |
| 265734 | 1 | $C_1$ | 1582.56 | 46.71 | 263827 | 1 | $C_1$ | 1626.16 | 90.31 |
| 285912 | 0 | $D_2$ | 1582.92 | 47.06 | 280595 | 1 | $C_1$ | 1626.18 | 90.32 |
| 285890 | 0 | $C_1$ | 1583.59 | 47.73 | 267017 | 2 | $C_1$ | 1626.19 | 90.33 |
| 285820 | 0 | $C_1$ | 1584.02 | 48.17 | 266749 | 2 | $C_1$ | 1626.19 | 90.34 |
| 285799 | 0 | $C_1$ | 1584.50 | 48.65 | 215658 | 2 | $C_1$ | 1626.20 | 90.35 |
| 285615 | 0 | $C_1$ | 1585.07 | 49.21 | 285666 | 0 | $C_1$ | 1626.20 | 90.35 |
| 285489 | 0 | $C_1$ | 1585.44 | 49.58 | 222909 | 2 | $C_1$ | 1626.21 | 90.36 |
| 285825 | 0 | $C_1$ | 1585.50 | 49.64 | 126455 | 2 | $C_1$ | 1626.22 | 90.36 |
| 285456 | 1 | $C_2$ | 1585.55 | 49.69 | 265670 | 2 | $C_1$ | 1626.22 | 90.36 |
| 285795 | 0 | $C_1$ | 1585.80 | 49.94 | 239246 | 1 | $C_1$ | 1626.22 | 90.36 |
| 285167 | 1 | $C_1$ | 1585.92 | 50.06 | 276533 | 2 | $C_1$ | 1626.22 | 90.36 |

|        |   |       |         |       |        |   |       |         |       |
|--------|---|-------|---------|-------|--------|---|-------|---------|-------|
| 285401 | 1 | $C_2$ | 1586.02 | 50.16 | 180010 | 2 | $C_I$ | 1626.22 | 90.37 |
| 285723 | 0 | $C_I$ | 1586.09 | 50.23 | 264470 | 1 | $C_I$ | 1626.23 | 90.37 |
| 282076 | 1 | $C_I$ | 1586.45 | 50.60 | 266703 | 2 | $C_I$ | 1626.24 | 90.38 |
| 285711 | 0 | $C_I$ | 1586.47 | 50.62 | 262979 | 2 | $C_I$ | 1626.24 | 90.39 |
| 285578 | 0 | $C_2$ | 1586.59 | 50.73 | 269649 | 1 | $C_I$ | 1626.25 | 90.39 |
| 285613 | 0 | $C_s$ | 1586.71 | 50.86 | 270820 | 2 | $C_I$ | 1626.25 | 90.40 |
| 285849 | 0 | $C_I$ | 1586.72 | 50.86 | 277397 | 2 | $C_I$ | 1626.26 | 90.40 |
| 283431 | 1 | $C_I$ | 1586.74 | 50.88 | 275985 | 1 | $C_I$ | 1626.27 | 90.42 |
| 285717 | 0 | $C_I$ | 1586.74 | 50.88 | 285595 | 0 | $C_2$ | 1626.27 | 90.42 |
| 285866 | 0 | $C_I$ | 1586.88 | 51.02 | 276054 | 2 | $C_I$ | 1626.28 | 90.42 |
| 285683 | 0 | $C_I$ | 1586.91 | 51.06 | 212582 | 2 | $C_I$ | 1626.30 | 90.44 |
| 285631 | 0 | $C_I$ | 1587.03 | 51.18 | 216571 | 2 | $C_I$ | 1626.31 | 90.45 |
| 281327 | 1 | $C_I$ | 1587.25 | 51.40 | 268639 | 2 | $C_I$ | 1626.31 | 90.46 |
| 285724 | 0 | $C_I$ | 1587.42 | 51.56 | 281999 | 2 | $C_I$ | 1626.34 | 90.48 |
| 285681 | 0 | $C_I$ | 1588.15 | 52.30 | 267274 | 2 | $C_I$ | 1626.34 | 90.48 |
| 285563 | 0 | $C_I$ | 1588.17 | 52.32 | 235745 | 2 | $C_I$ | 1626.34 | 90.48 |
| 285891 | 0 | $C_I$ | 1588.18 | 52.33 | 276168 | 2 | $C_I$ | 1626.34 | 90.48 |
| 285716 | 0 | $C_I$ | 1588.34 | 52.48 | 284324 | 1 | $C_I$ | 1626.36 | 90.51 |
| 285812 | 0 | $C_I$ | 1588.37 | 52.51 | 269222 | 2 | $C_I$ | 1626.37 | 90.51 |
| 285797 | 0 | $C_I$ | 1589.03 | 53.17 | 262495 | 1 | $C_I$ | 1626.37 | 90.52 |
| 285856 | 0 | $C_I$ | 1589.08 | 53.23 | 236593 | 2 | $C_I$ | 1626.38 | 90.52 |
| 285788 | 0 | $C_I$ | 1589.24 | 53.38 | 285004 | 1 | $C_I$ | 1626.39 | 90.54 |

|        |   |       |         |       |        |   |       |         |       |
|--------|---|-------|---------|-------|--------|---|-------|---------|-------|
| 285840 | 0 | $C_I$ | 1589.31 | 53.45 | 265758 | 2 | $C_I$ | 1626.39 | 90.54 |
| 213083 | 1 | $C_I$ | 1589.32 | 53.46 | 210274 | 2 | $C_I$ | 1626.40 | 90.54 |
| 285636 | 0 | $C_I$ | 1589.34 | 53.48 | 266600 | 2 | $C_I$ | 1626.40 | 90.55 |
| 285133 | 1 | $C_I$ | 1589.50 | 53.64 | 275614 | 2 | $C_I$ | 1626.41 | 90.56 |
| 285805 | 0 | $C_I$ | 1589.62 | 53.76 | 212287 | 2 | $C_I$ | 1626.41 | 90.56 |
| 265847 | 1 | $C_I$ | 1589.86 | 54.01 | 278682 | 1 | $C_I$ | 1626.42 | 90.56 |
| 285132 | 1 | $C_I$ | 1589.96 | 54.10 | 274804 | 2 | $C_I$ | 1626.43 | 90.57 |
| 285888 | 0 | $C_I$ | 1590.03 | 54.18 | 267225 | 1 | $C_I$ | 1626.44 | 90.58 |
| 252804 | 1 | $C_I$ | 1590.11 | 54.25 | 203246 | 1 | $C_I$ | 1626.44 | 90.59 |
| 275169 | 1 | $C_I$ | 1590.13 | 54.27 | 242641 | 2 | $C_I$ | 1626.45 | 90.60 |
| 265825 | 1 | $C_I$ | 1590.32 | 54.46 | 282351 | 2 | $C_I$ | 1626.45 | 90.60 |
| 285713 | 0 | $C_I$ | 1590.33 | 54.47 | 280198 | 1 | $C_I$ | 1626.46 | 90.61 |
| 281325 | 1 | $C_I$ | 1590.44 | 54.59 | 251163 | 2 | $C_I$ | 1626.47 | 90.61 |
| 276594 | 1 | $C_I$ | 1590.56 | 54.70 | 283404 | 1 | $C_I$ | 1626.47 | 90.61 |
| 285623 | 0 | $C_I$ | 1590.58 | 54.73 | 202958 | 2 | $C_I$ | 1626.47 | 90.62 |
| 283430 | 1 | $C_I$ | 1590.63 | 54.78 | 242651 | 1 | $C_I$ | 1626.48 | 90.63 |
| 275959 | 1 | $C_I$ | 1590.78 | 54.92 | 268480 | 2 | $C_I$ | 1626.49 | 90.64 |
| 212115 | 1 | $C_I$ | 1590.92 | 55.06 | 251793 | 2 | $C_I$ | 1626.50 | 90.64 |
| 285842 | 0 | $C_I$ | 1590.98 | 55.12 | 284259 | 1 | $C_I$ | 1626.51 | 90.65 |
| 285826 | 0 | $C_I$ | 1591.00 | 55.15 | 283890 | 1 | $C_I$ | 1626.51 | 90.66 |
| 285163 | 1 | $C_I$ | 1591.02 | 55.17 | 285103 | 1 | $C_I$ | 1626.51 | 90.66 |
| 285712 | 0 | $C_I$ | 1591.37 | 55.51 | 280647 | 1 | $C_I$ | 1626.51 | 90.66 |

|        |   |       |         |       |        |   |       |         |       |
|--------|---|-------|---------|-------|--------|---|-------|---------|-------|
| 278695 | 1 | $C_1$ | 1591.48 | 55.62 | 274676 | 1 | $C_1$ | 1626.52 | 90.67 |
| 285893 | 0 | $C_2$ | 1591.53 | 55.67 | 242644 | 1 | $C_1$ | 1626.53 | 90.67 |
| 285719 | 0 | $C_1$ | 1591.61 | 55.76 | 252807 | 1 | $C_1$ | 1626.53 | 90.67 |
| 285676 | 0 | $C_1$ | 1591.63 | 55.78 | 274072 | 2 | $C_1$ | 1626.53 | 90.68 |
| 285566 | 0 | $C_2$ | 1591.98 | 56.12 | 203658 | 2 | $C_1$ | 1626.55 | 90.69 |
| 285677 | 0 | $C_1$ | 1591.99 | 56.14 | 285355 | 2 | $C_1$ | 1626.55 | 90.69 |
| 266049 | 1 | $C_1$ | 1592.00 | 56.15 | 278689 | 2 | $C_1$ | 1626.56 | 90.70 |
| 285792 | 0 | $C_1$ | 1592.02 | 56.16 | 256878 | 1 | $C_1$ | 1626.56 | 90.71 |
| 207074 | 1 | $C_1$ | 1592.05 | 56.20 | 212109 | 1 | $C_1$ | 1626.56 | 90.71 |
| 285896 | 0 | $C_2$ | 1592.17 | 56.32 | 265759 | 1 | $C_1$ | 1626.57 | 90.71 |
| 282360 | 1 | $C_1$ | 1592.36 | 56.50 | 263117 | 1 | $C_1$ | 1626.58 | 90.72 |
| 285585 | 0 | $C_1$ | 1592.43 | 56.57 | 252624 | 2 | $C_1$ | 1626.58 | 90.72 |
| 226381 | 1 | $C_1$ | 1592.46 | 56.60 | 275433 | 2 | $C_1$ | 1626.59 | 90.73 |
| 285166 | 1 | $C_1$ | 1592.65 | 56.79 | 285881 | 0 | $C_1$ | 1626.59 | 90.74 |
| 285156 | 1 | $C_1$ | 1592.67 | 56.82 | 212049 | 2 | $C_1$ | 1626.60 | 90.74 |
| 223113 | 1 | $C_1$ | 1592.68 | 56.82 | 284297 | 2 | $C_1$ | 1626.60 | 90.75 |
| 285579 | 0 | $C_1$ | 1592.68 | 56.83 | 268433 | 2 | $C_1$ | 1626.63 | 90.78 |
| 285815 | 0 | $C_1$ | 1592.73 | 56.87 | 282171 | 2 | $C_1$ | 1626.63 | 90.78 |
| 213677 | 1 | $C_1$ | 1592.73 | 56.88 | 236196 | 2 | $C_1$ | 1626.64 | 90.78 |
| 285405 | 1 | $C_s$ | 1592.81 | 56.96 | 269172 | 2 | $C_1$ | 1626.64 | 90.78 |
| 285691 | 0 | $C_1$ | 1592.83 | 56.98 | 278397 | 1 | $C_2$ | 1626.65 | 90.79 |
| 231219 | 1 | $C_1$ | 1592.88 | 57.03 | 250913 | 2 | $C_1$ | 1626.66 | 90.81 |

|        |   |       |         |       |        |   |       |         |       |
|--------|---|-------|---------|-------|--------|---|-------|---------|-------|
| 285134 | 1 | $C_I$ | 1592.88 | 57.03 | 236572 | 1 | $C_I$ | 1626.67 | 90.81 |
| 285895 | 0 | $D_2$ | 1592.96 | 57.10 | 281397 | 1 | $C_I$ | 1626.67 | 90.82 |
| 285244 | 1 | $C_I$ | 1592.97 | 57.11 | 265673 | 2 | $C_I$ | 1626.68 | 90.82 |
| 285796 | 0 | $C_I$ | 1593.00 | 57.15 | 223287 | 2 | $C_I$ | 1626.68 | 90.82 |
| 284340 | 1 | $C_I$ | 1593.01 | 57.15 | 206350 | 1 | $C_I$ | 1626.69 | 90.83 |
| 281545 | 1 | $C_I$ | 1593.02 | 57.17 | 285733 | 0 | $C_I$ | 1626.69 | 90.84 |
| 212094 | 1 | $C_I$ | 1593.06 | 57.20 | 284290 | 1 | $C_I$ | 1626.70 | 90.85 |
| 285872 | 0 | $C_I$ | 1593.06 | 57.21 | 265761 | 2 | $C_I$ | 1626.71 | 90.85 |
| 285558 | 0 | $C_I$ | 1593.07 | 57.22 | 276932 | 2 | $C_I$ | 1626.71 | 90.85 |
| 285639 | 0 | $C_I$ | 1593.09 | 57.23 | 210848 | 2 | $C_I$ | 1626.71 | 90.86 |
| 282100 | 1 | $C_I$ | 1593.31 | 57.46 | 285517 | 0 | $C_I$ | 1626.72 | 90.86 |
| 285537 | 0 | $C_I$ | 1593.47 | 57.62 | 281099 | 1 | $C_I$ | 1626.73 | 90.87 |
| 285674 | 0 | $C_I$ | 1593.57 | 57.72 | 285568 | 0 | $C_I$ | 1626.73 | 90.87 |
| 282056 | 1 | $C_I$ | 1593.83 | 57.97 | 152569 | 2 | $C_I$ | 1626.73 | 90.87 |
| 285811 | 0 | $C_I$ | 1593.96 | 58.11 | 215032 | 1 | $C_I$ | 1626.73 | 90.88 |
| 285839 | 0 | $C_2$ | 1594.01 | 58.15 | 234811 | 1 | $C_I$ | 1626.73 | 90.88 |
| 285668 | 0 | $C_I$ | 1594.09 | 58.23 | 247238 | 2 | $C_I$ | 1626.74 | 90.88 |
| 231204 | 1 | $C_I$ | 1594.24 | 58.38 | 285652 | 0 | $C_I$ | 1626.74 | 90.88 |
| 281326 | 1 | $C_I$ | 1594.31 | 58.45 | 282352 | 2 | $C_I$ | 1626.74 | 90.88 |
| 282350 | 1 | $C_I$ | 1594.34 | 58.49 | 275634 | 1 | $C_s$ | 1626.75 | 90.90 |
| 285837 | 0 | $C_I$ | 1594.39 | 58.54 | 278545 | 2 | $C_I$ | 1626.75 | 90.90 |
| 285640 | 0 | $C_I$ | 1594.40 | 58.55 | 203786 | 1 | $C_I$ | 1626.75 | 90.90 |



|        |   |       |         |       |        |   |       |         |       |
|--------|---|-------|---------|-------|--------|---|-------|---------|-------|
| 285831 | 0 | $C_1$ | 1594.42 | 58.56 | 279771 | 1 | $C_1$ | 1626.75 | 90.90 |
| 284323 | 1 | $C_1$ | 1594.44 | 58.58 | 231177 | 1 | $C_1$ | 1626.76 | 90.90 |
| 285846 | 0 | $C_1$ | 1594.48 | 58.63 | 212392 | 2 | $C_1$ | 1626.76 | 90.91 |
| 275659 | 1 | $C_1$ | 1594.61 | 58.75 | 276085 | 2 | $C_1$ | 1626.76 | 90.91 |
| 275955 | 1 | $C_1$ | 1594.66 | 58.80 | 285174 | 1 | $C_1$ | 1626.77 | 90.92 |
| 250864 | 1 | $C_1$ | 1595.02 | 59.16 | 263580 | 2 | $C_1$ | 1626.78 | 90.92 |
| 214191 | 1 | $C_1$ | 1595.04 | 59.18 | 243333 | 1 | $C_1$ | 1626.78 | 90.93 |
| 283201 | 1 | $C_1$ | 1595.04 | 59.19 | 277346 | 1 | $C_1$ | 1626.80 | 90.94 |
| 285875 | 0 | $C_1$ | 1595.07 | 59.22 | 281593 | 1 | $C_1$ | 1626.80 | 90.94 |
| 285135 | 1 | $C_1$ | 1595.10 | 59.24 | 281588 | 2 | $C_1$ | 1626.80 | 90.95 |
| 212068 | 1 | $C_1$ | 1595.14 | 59.29 | 269701 | 1 | $C_1$ | 1626.82 | 90.96 |
| 276363 | 1 | $C_1$ | 1595.15 | 59.30 | 247626 | 1 | $C_1$ | 1626.82 | 90.97 |
| 285637 | 0 | $C_2$ | 1595.49 | 59.64 | 249478 | 2 | $C_1$ | 1626.82 | 90.97 |
| 285477 | 0 | $C_3$ | 1595.64 | 59.78 | 274478 | 1 | $C_1$ | 1626.83 | 90.97 |
| 214196 | 1 | $C_1$ | 1595.64 | 59.79 | 235002 | 1 | $C_1$ | 1626.83 | 90.97 |
| 285835 | 0 | $C_2$ | 1595.82 | 59.96 | 249969 | 1 | $C_1$ | 1626.83 | 90.98 |
| 285684 | 0 | $C_3$ | 1596.05 | 60.20 | 237139 | 1 | $C_1$ | 1626.84 | 90.98 |
| 285675 | 0 | $C_2$ | 1596.07 | 60.21 | 262864 | 2 | $C_1$ | 1626.84 | 90.98 |
| 275170 | 1 | $C_1$ | 1596.09 | 60.23 | 273459 | 2 | $C_1$ | 1626.85 | 91.00 |
| 285688 | 0 | $C_1$ | 1596.13 | 60.27 | 215289 | 2 | $C_1$ | 1626.85 | 91.00 |
| 275965 | 1 | $C_1$ | 1596.18 | 60.32 | 280666 | 2 | $C_1$ | 1626.86 | 91.01 |
| 285673 | 0 | $C_1$ | 1596.21 | 60.35 | 248111 | 1 | $C_1$ | 1626.86 | 91.01 |

|        |   |       |         |       |        |   |       |         |       |
|--------|---|-------|---------|-------|--------|---|-------|---------|-------|
| 275165 | 1 | $C_1$ | 1596.28 | 60.42 | 282735 | 1 | $C_1$ | 1626.87 | 91.01 |
| 266015 | 1 | $C_1$ | 1596.28 | 60.43 | 213145 | 2 | $C_1$ | 1626.87 | 91.02 |
| 285803 | 0 | $C_1$ | 1596.29 | 60.44 | 266090 | 2 | $C_1$ | 1626.88 | 91.02 |
| 285887 | 0 | $C_1$ | 1596.32 | 60.46 | 282321 | 2 | $C_1$ | 1626.88 | 91.03 |
| 285368 | 1 | $C_1$ | 1596.39 | 60.54 | 278706 | 2 | $C_1$ | 1626.88 | 91.03 |
| 285725 | 0 | $C_1$ | 1596.40 | 60.55 | 262968 | 2 | $C_1$ | 1626.89 | 91.03 |
| 285801 | 0 | $C_2$ | 1596.41 | 60.55 | 203238 | 2 | $C_1$ | 1626.90 | 91.05 |
| 285900 | 0 | $C_1$ | 1596.47 | 60.61 | 274574 | 1 | $C_1$ | 1626.91 | 91.06 |
| 265760 | 1 | $C_1$ | 1596.53 | 60.68 | 284274 | 1 | $C_1$ | 1626.92 | 91.06 |
| 285780 | 0 | $C_1$ | 1596.53 | 60.68 | 204616 | 1 | $C_1$ | 1626.92 | 91.06 |
| 285369 | 1 | $C_1$ | 1596.57 | 60.71 | 278685 | 1 | $C_1$ | 1626.92 | 91.07 |
| 285161 | 1 | $C_1$ | 1596.59 | 60.73 | 281363 | 1 | $C_1$ | 1626.93 | 91.07 |
| 285848 | 0 | $C_1$ | 1596.59 | 60.74 | 207164 | 2 | $C_1$ | 1626.93 | 91.08 |
| 268510 | 1 | $C_1$ | 1596.61 | 60.76 | 276256 | 2 | $C_1$ | 1626.94 | 91.08 |
| 284913 | 1 | $C_1$ | 1596.64 | 60.78 | 275491 | 1 | $C_1$ | 1626.94 | 91.09 |
| 284910 | 1 | $C_1$ | 1596.73 | 60.88 | 282888 | 2 | $C_1$ | 1626.94 | 91.09 |
| 282322 | 1 | $C_1$ | 1596.74 | 60.88 | 213695 | 2 | $C_1$ | 1626.95 | 91.09 |
| 285862 | 0 | $C_1$ | 1596.96 | 61.10 | 191323 | 2 | $C_1$ | 1626.95 | 91.10 |
| 284333 | 1 | $C_1$ | 1596.98 | 61.13 | 277859 | 2 | $C_1$ | 1626.97 | 91.11 |
| 276406 | 1 | $C_1$ | 1597.04 | 61.18 | 189315 | 2 | $C_1$ | 1626.97 | 91.11 |
| 220219 | 1 | $C_1$ | 1597.11 | 61.25 | 285643 | 0 | $C_1$ | 1626.97 | 91.12 |
| 251181 | 1 | $C_1$ | 1597.12 | 61.27 | 283219 | 2 | $C_1$ | 1626.97 | 91.12 |

|        |   |       |         |       |        |   |       |         |       |
|--------|---|-------|---------|-------|--------|---|-------|---------|-------|
| 285897 | 0 | $C_I$ | 1597.23 | 61.37 | 285608 | 0 | $C_I$ | 1626.97 | 91.12 |
| 285630 | 0 | $C_I$ | 1597.33 | 61.47 | 277647 | 1 | $C_I$ | 1626.98 | 91.12 |
| 242649 | 1 | $C_I$ | 1597.42 | 61.56 | 214297 | 1 | $C_I$ | 1626.99 | 91.13 |
| 278571 | 1 | $C_I$ | 1597.43 | 61.57 | 285819 | 0 | $C_s$ | 1626.99 | 91.14 |
| 285635 | 0 | $C_I$ | 1597.50 | 61.64 | 262969 | 2 | $C_I$ | 1627.00 | 91.14 |
| 284754 | 1 | $C_I$ | 1597.65 | 61.80 | 284684 | 1 | $C_I$ | 1627.03 | 91.17 |
| 285591 | 0 | $C_I$ | 1597.69 | 61.83 | 228479 | 1 | $C_I$ | 1627.03 | 91.17 |
| 265733 | 1 | $C_I$ | 1597.72 | 61.86 | 272652 | 2 | $C_I$ | 1627.04 | 91.18 |
| 211166 | 1 | $C_I$ | 1597.72 | 61.86 | 203231 | 2 | $C_I$ | 1627.04 | 91.19 |
| 281570 | 1 | $C_I$ | 1597.74 | 61.88 | 280590 | 1 | $C_I$ | 1627.04 | 91.19 |
| 283132 | 1 | $C_I$ | 1597.75 | 61.89 | 285406 | 1 | $C_I$ | 1627.06 | 91.20 |
| 285501 | 0 | $C_s$ | 1597.82 | 61.96 | 277443 | 1 | $C_I$ | 1627.07 | 91.21 |
| 285645 | 0 | $C_I$ | 1597.86 | 62.00 | 203247 | 2 | $C_I$ | 1627.07 | 91.22 |
| 285794 | 0 | $C_I$ | 1597.91 | 62.06 | 247041 | 2 | $C_I$ | 1627.07 | 91.22 |
| 285365 | 1 | $C_I$ | 1597.91 | 62.06 | 282929 | 2 | $C_I$ | 1627.07 | 91.22 |
| 285687 | 0 | $C_I$ | 1598.08 | 62.23 | 213578 | 2 | $C_I$ | 1627.07 | 91.22 |
| 203259 | 1 | $C_I$ | 1598.10 | 62.25 | 226375 | 1 | $C_I$ | 1627.08 | 91.22 |
| 285581 | 0 | $C_I$ | 1598.14 | 62.28 | 275162 | 2 | $C_I$ | 1627.08 | 91.22 |
| 223134 | 1 | $C_I$ | 1598.17 | 62.31 | 275552 | 2 | $C_I$ | 1627.08 | 91.22 |
| 277349 | 1 | $C_I$ | 1598.30 | 62.45 | 211194 | 2 | $C_I$ | 1627.08 | 91.23 |
| 276596 | 1 | $C_I$ | 1598.32 | 62.46 | 282004 | 2 | $C_I$ | 1627.09 | 91.23 |
| 203663 | 1 | $C_I$ | 1598.39 | 62.53 | 283189 | 2 | $C_I$ | 1627.09 | 91.23 |

|        |   |       |         |       |        |   |       |         |       |
|--------|---|-------|---------|-------|--------|---|-------|---------|-------|
| 203496 | 1 | $C_1$ | 1598.42 | 62.56 | 276341 | 2 | $C_1$ | 1627.09 | 91.23 |
| 282600 | 1 | $C_1$ | 1598.49 | 62.63 | 203236 | 2 | $C_1$ | 1627.09 | 91.24 |
| 268657 | 1 | $C_1$ | 1598.57 | 62.71 | 266791 | 2 | $C_1$ | 1627.09 | 91.24 |
| 285224 | 1 | $C_1$ | 1598.61 | 62.75 | 276561 | 2 | $C_1$ | 1627.09 | 91.24 |
| 279697 | 1 | $C_1$ | 1598.75 | 62.89 | 263023 | 2 | $C_1$ | 1627.10 | 91.25 |
| 276225 | 1 | $C_1$ | 1598.78 | 62.93 | 262826 | 1 | $C_1$ | 1627.11 | 91.25 |
| 285597 | 0 | $C_1$ | 1598.79 | 62.93 | 280110 | 1 | $C_1$ | 1627.12 | 91.26 |
| 285806 | 0 | $C_2$ | 1598.82 | 62.97 | 281057 | 1 | $C_1$ | 1627.12 | 91.27 |
| 284336 | 1 | $C_1$ | 1598.87 | 63.01 | 244061 | 1 | $C_1$ | 1627.13 | 91.27 |
| 207054 | 1 | $C_1$ | 1598.91 | 63.06 | 283448 | 2 | $C_1$ | 1627.13 | 91.27 |
| 282338 | 1 | $C_1$ | 1598.92 | 63.07 | 284299 | 1 | $C_1$ | 1627.13 | 91.28 |
| 251604 | 1 | $C_1$ | 1598.93 | 63.07 | 216463 | 2 | $C_1$ | 1627.14 | 91.28 |
| 265822 | 1 | $C_1$ | 1598.95 | 63.10 | 285627 | 0 | $C_1$ | 1627.15 | 91.29 |
| 276361 | 1 | $C_1$ | 1599.03 | 63.17 | 251458 | 1 | $C_1$ | 1627.15 | 91.30 |
| 285894 | 0 | $D_2$ | 1599.07 | 63.21 | 257557 | 1 | $C_1$ | 1627.16 | 91.30 |
| 285860 | 0 | $C_1$ | 1599.10 | 63.25 | 263571 | 1 | $C_1$ | 1627.17 | 91.32 |
| 285899 | 0 | $C_1$ | 1599.11 | 63.25 | 255769 | 1 | $C_1$ | 1627.17 | 91.32 |
| 281544 | 1 | $C_1$ | 1599.11 | 63.26 | 282570 | 2 | $C_1$ | 1627.17 | 91.32 |
| 285669 | 0 | $C_1$ | 1599.11 | 63.26 | 145833 | 2 | $C_1$ | 1627.19 | 91.33 |
| 234787 | 1 | $C_1$ | 1599.13 | 63.27 | 285001 | 1 | $C_1$ | 1627.19 | 91.33 |
| 283064 | 1 | $C_1$ | 1599.24 | 63.38 | 284461 | 1 | $C_1$ | 1627.19 | 91.34 |
| 285838 | 0 | $C_1$ | 1599.32 | 63.46 | 283100 | 1 | $C_1$ | 1627.20 | 91.34 |

|        |   |       |         |       |        |   |       |         |       |
|--------|---|-------|---------|-------|--------|---|-------|---------|-------|
| 213786 | 1 | $C_1$ | 1599.39 | 63.53 | 279054 | 1 | $C_1$ | 1627.20 | 91.35 |
| 282920 | 1 | $C_1$ | 1599.40 | 63.54 | 228842 | 1 | $C_1$ | 1627.20 | 91.35 |
| 284908 | 1 | $C_1$ | 1599.51 | 63.65 | 231940 | 1 | $C_1$ | 1627.20 | 91.35 |
| 285088 | 1 | $C_1$ | 1599.52 | 63.67 | 266514 | 2 | $C_1$ | 1627.20 | 91.35 |
| 284916 | 1 | $C_1$ | 1599.62 | 63.77 | 268621 | 2 | $C_1$ | 1627.22 | 91.36 |
| 282355 | 1 | $C_1$ | 1599.63 | 63.77 | 242278 | 1 | $C_1$ | 1627.22 | 91.36 |
| 207225 | 1 | $C_1$ | 1599.67 | 63.82 | 277275 | 2 | $C_1$ | 1627.22 | 91.37 |
| 285834 | 0 | $C_1$ | 1599.69 | 63.83 | 283921 | 1 | $C_1$ | 1627.23 | 91.37 |
| 285728 | 0 | $C_1$ | 1599.72 | 63.86 | 236177 | 2 | $C_1$ | 1627.23 | 91.37 |
| 277373 | 1 | $C_2$ | 1599.72 | 63.87 | 266566 | 2 | $C_1$ | 1627.23 | 91.38 |
| 284855 | 1 | $C_1$ | 1599.73 | 63.87 | 253604 | 1 | $C_1$ | 1627.23 | 91.38 |
| 283099 | 1 | $C_1$ | 1599.76 | 63.90 | 252549 | 1 | $C_1$ | 1627.24 | 91.38 |
| 276358 | 1 | $C_1$ | 1599.81 | 63.95 | 214125 | 2 | $C_1$ | 1627.24 | 91.39 |
| 282054 | 1 | $C_1$ | 1599.81 | 63.96 | 269079 | 2 | $C_1$ | 1627.24 | 91.39 |
| 281711 | 1 | $C_1$ | 1599.85 | 63.99 | 242656 | 2 | $C_1$ | 1627.24 | 91.39 |
| 285823 | 0 | $C_1$ | 1599.89 | 64.04 | 262956 | 2 | $C_1$ | 1627.25 | 91.39 |
| 284905 | 1 | $C_1$ | 1599.90 | 64.04 | 282853 | 1 | $C_1$ | 1627.25 | 91.39 |
| 285682 | 0 | $C_1$ | 1599.95 | 64.09 | 284369 | 1 | $C_1$ | 1627.25 | 91.39 |
| 275434 | 1 | $C_1$ | 1599.97 | 64.12 | 236168 | 2 | $C_1$ | 1627.25 | 91.39 |
| 276360 | 1 | $C_1$ | 1600.02 | 64.16 | 280669 | 1 | $C_1$ | 1627.27 | 91.41 |
| 285714 | 0 | $C_1$ | 1600.05 | 64.19 | 226450 | 1 | $C_1$ | 1627.27 | 91.42 |
| 262924 | 1 | $C_1$ | 1600.08 | 64.23 | 269643 | 2 | $C_1$ | 1627.28 | 91.42 |

|        |   |       |         |       |        |   |       |         |       |
|--------|---|-------|---------|-------|--------|---|-------|---------|-------|
| 285259 | 1 | $C_1$ | 1600.09 | 64.23 | 205221 | 2 | $C_1$ | 1627.28 | 91.43 |
| 285629 | 0 | $C_1$ | 1600.11 | 64.25 | 251166 | 2 | $C_1$ | 1627.28 | 91.43 |
| 285889 | 0 | $C_1$ | 1600.20 | 64.34 | 265453 | 2 | $C_1$ | 1627.29 | 91.44 |
| 236583 | 1 | $C_1$ | 1600.24 | 64.39 | 239191 | 2 | $C_1$ | 1627.30 | 91.45 |
| 283447 | 1 | $C_1$ | 1600.26 | 64.40 | 275962 | 2 | $C_1$ | 1627.30 | 91.45 |
| 252584 | 1 | $C_1$ | 1600.32 | 64.46 | 247260 | 1 | $C_1$ | 1627.31 | 91.46 |
| 207055 | 1 | $C_1$ | 1600.32 | 64.46 | 228691 | 2 | $C_1$ | 1627.31 | 91.46 |
| 282324 | 1 | $C_1$ | 1600.34 | 64.48 | 278317 | 1 | $C_1$ | 1627.34 | 91.48 |
| 214178 | 1 | $C_1$ | 1600.35 | 64.50 | 284945 | 2 | $C_1$ | 1627.34 | 91.49 |
| 285708 | 0 | $C_1$ | 1600.38 | 64.53 | 282919 | 2 | $C_1$ | 1627.35 | 91.50 |
| 255767 | 1 | $C_1$ | 1600.42 | 64.56 | 285222 | 1 | $C_1$ | 1627.37 | 91.52 |
| 282319 | 1 | $C_1$ | 1600.42 | 64.57 | 250168 | 1 | $C_1$ | 1627.37 | 91.52 |
| 284367 | 1 | $C_1$ | 1600.45 | 64.59 | 247390 | 2 | $C_1$ | 1627.37 | 91.52 |
| 285506 | 0 | $C_1$ | 1600.45 | 64.59 | 214304 | 1 | $C_1$ | 1627.37 | 91.52 |
| 282353 | 2 | $C_1$ | 1600.46 | 64.61 | 279097 | 1 | $C_1$ | 1627.37 | 91.52 |
| 252575 | 1 | $C_1$ | 1600.47 | 64.62 | 276395 | 2 | $C_1$ | 1627.38 | 91.52 |
| 282594 | 1 | $C_1$ | 1600.55 | 64.69 | 282315 | 2 | $C_1$ | 1627.38 | 91.53 |
| 277701 | 1 | $C_1$ | 1600.64 | 64.78 | 109789 | 2 | $C_1$ | 1627.38 | 91.53 |
| 275969 | 1 | $C_1$ | 1600.71 | 64.86 | 267239 | 2 | $C_1$ | 1627.39 | 91.53 |
| 285867 | 0 | $C_1$ | 1600.75 | 64.89 | 252743 | 2 | $C_1$ | 1627.39 | 91.53 |
| 285199 | 1 | $C_1$ | 1600.76 | 64.91 | 274740 | 1 | $C_1$ | 1627.39 | 91.54 |
| 274005 | 1 | $C_1$ | 1600.83 | 64.97 | 269769 | 2 | $C_1$ | 1627.41 | 91.56 |

|        |   |       |         |       |        |   |       |         |       |
|--------|---|-------|---------|-------|--------|---|-------|---------|-------|
| 282085 | 1 | $C_I$ | 1601.02 | 65.16 | 283063 | 2 | $C_I$ | 1627.41 | 91.56 |
| 267202 | 1 | $C_I$ | 1601.04 | 65.18 | 270958 | 2 | $C_I$ | 1627.42 | 91.57 |
| 237214 | 1 | $C_I$ | 1601.05 | 65.19 | 226778 | 1 | $C_I$ | 1627.43 | 91.57 |
| 283202 | 1 | $C_I$ | 1601.06 | 65.21 | 276833 | 2 | $C_I$ | 1627.43 | 91.57 |
| 265650 | 1 | $C_I$ | 1601.08 | 65.22 | 252903 | 1 | $C_I$ | 1627.43 | 91.57 |
| 256781 | 1 | $C_I$ | 1601.14 | 65.28 | 281980 | 2 | $C_I$ | 1627.43 | 91.57 |
| 285642 | 0 | $C_I$ | 1601.21 | 65.35 | 212092 | 2 | $C_I$ | 1627.44 | 91.59 |
| 285771 | 0 | $C_I$ | 1601.22 | 65.37 | 254913 | 2 | $C_I$ | 1627.45 | 91.59 |
| 285200 | 1 | $C_I$ | 1601.25 | 65.39 | 219523 | 1 | $C_I$ | 1627.46 | 91.60 |
| 285705 | 0 | $C_I$ | 1601.26 | 65.41 | 284028 | 1 | $C_S$ | 1627.46 | 91.60 |
| 285824 | 0 | $C_I$ | 1601.39 | 65.54 | 227503 | 2 | $C_I$ | 1627.46 | 91.61 |
| 269218 | 1 | $C_I$ | 1601.40 | 65.55 | 251182 | 2 | $C_I$ | 1627.49 | 91.64 |
| 285821 | 0 | $C_I$ | 1601.42 | 65.57 | 282343 | 2 | $C_I$ | 1627.50 | 91.65 |
| 235726 | 1 | $C_I$ | 1601.46 | 65.60 | 236225 | 2 | $C_I$ | 1627.50 | 91.65 |
| 273900 | 1 | $C_I$ | 1601.47 | 65.62 | 269645 | 2 | $C_I$ | 1627.51 | 91.65 |
| 247230 | 1 | $C_I$ | 1601.49 | 65.64 | 276628 | 1 | $C_S$ | 1627.51 | 91.65 |
| 285827 | 0 | $C_2$ | 1601.50 | 65.64 | 251235 | 2 | $C_I$ | 1627.51 | 91.65 |
| 285854 | 0 | $C_I$ | 1601.62 | 65.76 | 236344 | 2 | $C_I$ | 1627.51 | 91.66 |
| 285618 | 0 | $C_I$ | 1601.64 | 65.78 | 228681 | 2 | $C_I$ | 1627.52 | 91.66 |
| 285850 | 0 | $C_2$ | 1601.68 | 65.82 | 274810 | 2 | $C_I$ | 1627.52 | 91.67 |
| 284883 | 1 | $C_I$ | 1601.70 | 65.85 | 276181 | 2 | $C_I$ | 1627.53 | 91.68 |
| 285871 | 0 | $C_I$ | 1601.73 | 65.87 | 285565 | 0 | $C_I$ | 1627.53 | 91.68 |

|        |   |       |         |       |        |   |       |         |       |
|--------|---|-------|---------|-------|--------|---|-------|---------|-------|
| 227544 | 1 | $C_I$ | 1601.79 | 65.94 | 283762 | 1 | $C_I$ | 1627.54 | 91.68 |
| 282601 | 1 | $C_I$ | 1601.86 | 66.00 | 285254 | 2 | $C_I$ | 1627.54 | 91.68 |
| 285715 | 0 | $C_S$ | 1601.87 | 66.01 | 285495 | 0 | $C_I$ | 1627.55 | 91.70 |
| 265729 | 1 | $C_I$ | 1601.89 | 66.03 | 263337 | 2 | $C_I$ | 1627.56 | 91.70 |
| 285172 | 1 | $C_I$ | 1601.90 | 66.04 | 283006 | 2 | $C_I$ | 1627.56 | 91.70 |
| 284334 | 1 | $C_I$ | 1601.91 | 66.05 | 252607 | 1 | $C_I$ | 1627.57 | 91.72 |
| 282591 | 1 | $C_I$ | 1601.94 | 66.08 | 215145 | 1 | $C_I$ | 1627.57 | 91.72 |
| 249967 | 1 | $C_I$ | 1601.96 | 66.11 | 283087 | 1 | $C_I$ | 1627.58 | 91.72 |
| 276180 | 2 | $C_I$ | 1602.00 | 66.14 | 235730 | 2 | $C_I$ | 1627.62 | 91.76 |
| 285720 | 0 | $C_I$ | 1602.02 | 66.16 | 273920 | 1 | $C_I$ | 1627.62 | 91.76 |
| 285534 | 0 | $C_I$ | 1602.03 | 66.18 | 243916 | 1 | $C_I$ | 1627.62 | 91.76 |
| 203278 | 1 | $C_I$ | 1602.05 | 66.20 | 268435 | 2 | $C_I$ | 1627.63 | 91.78 |
| 282348 | 1 | $C_I$ | 1602.06 | 66.20 | 180946 | 2 | $C_I$ | 1627.63 | 91.78 |
| 252757 | 1 | $C_I$ | 1602.08 | 66.22 | 236437 | 1 | $C_I$ | 1627.64 | 91.78 |
| 268511 | 1 | $C_I$ | 1602.09 | 66.23 | 282170 | 1 | $C_I$ | 1627.64 | 91.79 |
| 282354 | 1 | $C_I$ | 1602.16 | 66.31 | 212554 | 2 | $C_I$ | 1627.65 | 91.79 |
| 284906 | 1 | $C_I$ | 1602.18 | 66.33 | 280162 | 2 | $C_I$ | 1627.66 | 91.80 |
| 285772 | 0 | $C_I$ | 1602.19 | 66.34 | 252512 | 2 | $C_I$ | 1627.66 | 91.80 |
| 282576 | 1 | $C_I$ | 1602.20 | 66.35 | 265731 | 2 | $C_I$ | 1627.67 | 91.81 |
| 285381 | 1 | $C_2$ | 1602.21 | 66.36 | 273390 | 1 | $C_I$ | 1627.68 | 91.82 |
| 251178 | 1 | $C_I$ | 1602.22 | 66.36 | 284621 | 1 | $C_I$ | 1627.68 | 91.82 |
| 284282 | 1 | $C_S$ | 1602.39 | 66.53 | 284894 | 1 | $C_I$ | 1627.68 | 91.83 |



|        |   |       |         |       |        |   |       |         |       |
|--------|---|-------|---------|-------|--------|---|-------|---------|-------|
| 223809 | 1 | $C_I$ | 1602.40 | 66.54 | 274163 | 2 | $C_I$ | 1627.70 | 91.84 |
| 282575 | 1 | $C_I$ | 1602.40 | 66.55 | 237220 | 2 | $C_I$ | 1627.70 | 91.85 |
| 281712 | 1 | $C_I$ | 1602.41 | 66.55 | 272405 | 1 | $C_I$ | 1627.70 | 91.85 |
| 284343 | 1 | $C_I$ | 1602.43 | 66.58 | 226347 | 2 | $C_I$ | 1627.71 | 91.85 |
| 266012 | 1 | $C_I$ | 1602.45 | 66.59 | 277587 | 2 | $C_I$ | 1627.71 | 91.85 |
| 285680 | 0 | $C_I$ | 1602.61 | 66.75 | 250177 | 1 | $C_I$ | 1627.72 | 91.87 |
| 285275 | 1 | $C_I$ | 1602.64 | 66.78 | 214808 | 1 | $C_I$ | 1627.73 | 91.87 |
| 282589 | 1 | $C_I$ | 1602.67 | 66.82 | 282326 | 2 | $C_I$ | 1627.73 | 91.88 |
| 281618 | 1 | $C_I$ | 1602.74 | 66.89 | 216430 | 2 | $C_I$ | 1627.74 | 91.88 |
| 285193 | 1 | $C_I$ | 1602.74 | 66.89 | 281434 | 2 | $C_I$ | 1627.74 | 91.89 |
| 284625 | 1 | $C_I$ | 1602.79 | 66.94 | 275368 | 2 | $C_I$ | 1627.75 | 91.89 |
| 282624 | 1 | $C_I$ | 1602.81 | 66.96 | 231069 | 1 | $C_I$ | 1627.75 | 91.90 |
| 283203 | 1 | $C_I$ | 1602.85 | 67.00 | 262432 | 1 | $C_I$ | 1627.75 | 91.90 |
| 284842 | 1 | $C_I$ | 1602.93 | 67.08 | 251370 | 2 | $C_I$ | 1627.75 | 91.90 |
| 280096 | 1 | $C_I$ | 1602.95 | 67.09 | 206390 | 1 | $C_I$ | 1627.76 | 91.91 |
| 205206 | 1 | $C_I$ | 1602.96 | 67.11 | 285089 | 2 | $C_I$ | 1627.79 | 91.93 |
| 234805 | 1 | $C_I$ | 1602.97 | 67.11 | 276230 | 1 | $C_I$ | 1627.79 | 91.93 |
| 251776 | 1 | $C_I$ | 1603.01 | 67.16 | 280769 | 1 | $C_I$ | 1627.80 | 91.94 |
| 284338 | 1 | $C_I$ | 1603.02 | 67.16 | 276388 | 1 | $C_I$ | 1627.80 | 91.95 |
| 281546 | 2 | $C_I$ | 1603.02 | 67.16 | 269450 | 1 | $C_I$ | 1627.80 | 91.95 |
| 284298 | 1 | $C_I$ | 1603.07 | 67.21 | 277083 | 2 | $C_I$ | 1627.80 | 91.95 |
| 265727 | 1 | $C_I$ | 1603.07 | 67.21 | 277444 | 2 | $C_I$ | 1627.80 | 91.95 |

|        |   |          |         |       |        |   |       |         |       |
|--------|---|----------|---------|-------|--------|---|-------|---------|-------|
| 214124 | 1 | $C_I$    | 1603.12 | 67.26 | 269644 | 2 | $C_I$ | 1627.80 | 91.95 |
| 285388 | 1 | $C_s$    | 1603.14 | 67.28 | 281582 | 1 | $C_I$ | 1627.82 | 91.96 |
| 231205 | 1 | $C_I$    | 1603.15 | 67.30 | 207166 | 2 | $C_I$ | 1627.83 | 91.97 |
| 221129 | 1 | $C_I$    | 1603.19 | 67.33 | 251209 | 2 | $C_I$ | 1627.84 | 91.99 |
| 285776 | 0 | $C_I$    | 1603.20 | 67.34 | 227482 | 2 | $C_I$ | 1627.85 | 91.99 |
| 285817 | 0 | $C_s$    | 1603.25 | 67.39 | 265595 | 2 | $C_I$ | 1627.86 | 92.00 |
| 285667 | 0 | $C_I$    | 1603.25 | 67.39 | 285016 | 2 | $C_I$ | 1627.86 | 92.01 |
| 268670 | 1 | $C_I$    | 1603.30 | 67.45 | 284770 | 1 | $C_I$ | 1627.86 | 92.01 |
| 252787 | 1 | $C_I$    | 1603.32 | 67.46 | 285531 | 0 | $C_I$ | 1627.86 | 92.01 |
| 285633 | 0 | $C_I$    | 1603.32 | 67.47 | 279001 | 2 | $C_I$ | 1627.87 | 92.01 |
| 285664 | 0 | $C_I$    | 1603.32 | 67.47 | 138404 | 2 | $C_I$ | 1627.88 | 92.02 |
| 285353 | 2 | $C_I$    | 1603.36 | 67.50 | 237562 | 2 | $C_I$ | 1627.88 | 92.03 |
| 215033 | 1 | $C_I$    | 1603.39 | 67.54 | 281547 | 1 | $C_s$ | 1627.89 | 92.03 |
| 285557 | 0 | $C_{2v}$ | 1603.40 | 67.54 | 252582 | 2 | $C_I$ | 1627.89 | 92.04 |
| 285583 | 0 | $C_I$    | 1603.40 | 67.55 | 213785 | 2 | $C_I$ | 1627.92 | 92.06 |
| 266055 | 1 | $C_I$    | 1603.41 | 67.55 | 207895 | 1 | $C_I$ | 1627.92 | 92.07 |
| 284881 | 1 | $C_I$    | 1603.42 | 67.57 | 218902 | 2 | $C_I$ | 1627.93 | 92.07 |
| 284331 | 1 | $C_I$    | 1603.50 | 67.64 | 285322 | 1 | $C_I$ | 1627.93 | 92.08 |
| 284319 | 1 | $C_I$    | 1603.55 | 67.69 | 248436 | 1 | $C_I$ | 1627.95 | 92.09 |
| 266598 | 1 | $C_I$    | 1603.56 | 67.71 | 256879 | 1 | $C_I$ | 1627.95 | 92.09 |
| 273990 | 1 | $C_I$    | 1603.57 | 67.72 | 276195 | 2 | $C_I$ | 1627.95 | 92.10 |
| 284289 | 1 | $C_I$    | 1603.61 | 67.75 | 205637 | 1 | $C_I$ | 1627.95 | 92.10 |

|        |   |       |         |       |        |   |       |         |       |
|--------|---|-------|---------|-------|--------|---|-------|---------|-------|
| 223061 | 1 | $C_1$ | 1603.62 | 67.76 | 180123 | 2 | $C_1$ | 1627.95 | 92.10 |
| 210952 | 1 | $C_1$ | 1603.64 | 67.78 | 265138 | 2 | $C_1$ | 1627.96 | 92.10 |
| 285626 | 0 | $C_1$ | 1603.65 | 67.80 | 252447 | 2 | $C_1$ | 1627.97 | 92.11 |
| 251184 | 2 | $C_1$ | 1603.69 | 67.83 | 267419 | 2 | $C_1$ | 1627.97 | 92.11 |
| 284345 | 1 | $C_1$ | 1603.70 | 67.85 | 278276 | 1 | $C_2$ | 1627.97 | 92.12 |
| 251648 | 1 | $C_1$ | 1603.73 | 67.87 | 227317 | 2 | $C_1$ | 1627.98 | 92.13 |
| 284907 | 1 | $C_1$ | 1603.73 | 67.88 | 202985 | 2 | $C_1$ | 1627.99 | 92.13 |
| 213661 | 1 | $C_1$ | 1603.78 | 67.92 | 250141 | 1 | $C_1$ | 1627.99 | 92.14 |
| 276251 | 2 | $C_1$ | 1603.79 | 67.93 | 203881 | 2 | $C_1$ | 1628.00 | 92.14 |
| 263113 | 1 | $C_1$ | 1603.80 | 67.94 | 252619 | 2 | $C_1$ | 1628.01 | 92.16 |
| 278493 | 1 | $C_1$ | 1603.84 | 67.98 | 227548 | 2 | $C_1$ | 1628.02 | 92.16 |
| 269379 | 1 | $C_1$ | 1603.85 | 67.99 | 283761 | 2 | $C_1$ | 1628.02 | 92.16 |
| 283679 | 1 | $C_1$ | 1603.89 | 68.04 | 275167 | 2 | $C_1$ | 1628.02 | 92.16 |
| 265801 | 1 | $C_1$ | 1603.98 | 68.12 | 270951 | 1 | $C_1$ | 1628.02 | 92.16 |
| 255250 | 1 | $C_1$ | 1603.99 | 68.13 | 243796 | 2 | $C_1$ | 1628.02 | 92.17 |
| 284322 | 1 | $C_1$ | 1603.99 | 68.14 | 203271 | 2 | $C_1$ | 1628.03 | 92.18 |
| 276414 | 1 | $C_1$ | 1604.00 | 68.14 | 276340 | 2 | $C_1$ | 1628.06 | 92.20 |
| 228397 | 1 | $C_1$ | 1604.00 | 68.15 | 213558 | 2 | $C_1$ | 1628.06 | 92.21 |
| 284852 | 1 | $C_1$ | 1604.03 | 68.18 | 236182 | 2 | $C_1$ | 1628.07 | 92.22 |
| 266502 | 1 | $C_1$ | 1604.05 | 68.20 | 236492 | 2 | $C_1$ | 1628.07 | 92.22 |
| 207193 | 1 | $C_1$ | 1604.06 | 68.21 | 218883 | 1 | $C_1$ | 1628.08 | 92.22 |
| 278740 | 1 | $C_1$ | 1604.08 | 68.22 | 268564 | 2 | $C_1$ | 1628.08 | 92.22 |

|        |   |       |         |       |        |   |       |         |       |
|--------|---|-------|---------|-------|--------|---|-------|---------|-------|
| 214175 | 1 | $C_I$ | 1604.09 | 68.24 | 236667 | 1 | $C_I$ | 1628.08 | 92.22 |
| 251180 | 2 | $C_I$ | 1604.18 | 68.33 | 275367 | 1 | $C_I$ | 1628.08 | 92.23 |
| 268509 | 1 | $C_I$ | 1604.19 | 68.34 | 263550 | 2 | $C_I$ | 1628.09 | 92.23 |
| 285808 | 0 | $C_S$ | 1604.24 | 68.38 | 273693 | 1 | $C_I$ | 1628.09 | 92.23 |
| 282363 | 1 | $C_I$ | 1604.25 | 68.39 | 276293 | 2 | $C_I$ | 1628.10 | 92.24 |
| 285775 | 0 | $C_I$ | 1604.25 | 68.39 | 229578 | 2 | $C_I$ | 1628.10 | 92.24 |
| 276223 | 1 | $C_I$ | 1604.26 | 68.41 | 273912 | 1 | $C_I$ | 1628.11 | 92.25 |
| 285679 | 0 | $C_I$ | 1604.29 | 68.43 | 277402 | 2 | $C_I$ | 1628.11 | 92.25 |
| 235709 | 1 | $C_I$ | 1604.34 | 68.49 | 283374 | 2 | $C_I$ | 1628.12 | 92.26 |
| 285386 | 1 | $C_I$ | 1604.35 | 68.50 | 283438 | 1 | $C_I$ | 1628.12 | 92.27 |
| 268504 | 2 | $C_I$ | 1604.38 | 68.53 | 218910 | 2 | $C_I$ | 1628.13 | 92.27 |
| 285863 | 0 | $C_I$ | 1604.39 | 68.53 | 212390 | 2 | $C_I$ | 1628.14 | 92.29 |
| 284446 | 1 | $C_I$ | 1604.47 | 68.62 | 282523 | 2 | $C_I$ | 1628.16 | 92.31 |
| 285491 | 0 | $C_I$ | 1604.49 | 68.64 | 282686 | 2 | $C_I$ | 1628.17 | 92.31 |
| 275988 | 1 | $C_I$ | 1604.51 | 68.65 | 212086 | 2 | $C_I$ | 1628.17 | 92.32 |
| 285396 | 1 | $C_I$ | 1604.51 | 68.65 | 284898 | 1 | $C_I$ | 1628.18 | 92.33 |
| 282317 | 1 | $C_I$ | 1604.63 | 68.77 | 278305 | 2 | $C_I$ | 1628.20 | 92.35 |
| 281437 | 1 | $C_I$ | 1604.64 | 68.79 | 282993 | 2 | $C_I$ | 1628.21 | 92.35 |
| 285155 | 1 | $C_I$ | 1604.67 | 68.81 | 234769 | 1 | $C_I$ | 1628.21 | 92.36 |
| 282595 | 1 | $C_I$ | 1604.67 | 68.81 | 284393 | 2 | $C_I$ | 1628.21 | 92.36 |
| 285785 | 0 | $C_3$ | 1604.72 | 68.86 | 213234 | 2 | $C_I$ | 1628.21 | 92.36 |
| 284912 | 1 | $C_I$ | 1604.73 | 68.87 | 266556 | 2 | $C_I$ | 1628.22 | 92.36 |

|        |   |       |         |       |        |   |       |         |       |
|--------|---|-------|---------|-------|--------|---|-------|---------|-------|
| 277698 | 1 | $C_1$ | 1604.77 | 68.91 | 222938 | 1 | $C_1$ | 1628.22 | 92.36 |
| 285366 | 2 | $C_1$ | 1604.81 | 68.95 | 270612 | 1 | $C_1$ | 1628.22 | 92.36 |
| 282055 | 1 | $C_1$ | 1604.85 | 68.99 | 252632 | 1 | $C_1$ | 1628.22 | 92.37 |
| 281324 | 1 | $C_1$ | 1604.91 | 69.05 | 265649 | 1 | $C_1$ | 1628.22 | 92.37 |
| 281567 | 1 | $C_1$ | 1604.93 | 69.07 | 285552 | 0 | $C_1$ | 1628.22 | 92.37 |
| 262788 | 1 | $C_1$ | 1604.95 | 69.10 | 283487 | 1 | $C_1$ | 1628.22 | 92.37 |
| 214982 | 1 | $C_1$ | 1605.12 | 69.27 | 266752 | 2 | $C_1$ | 1628.23 | 92.37 |
| 285017 | 1 | $C_1$ | 1605.14 | 69.28 | 278264 | 1 | $C_2$ | 1628.23 | 92.38 |
| 228290 | 1 | $C_1$ | 1605.17 | 69.31 | 266741 | 2 | $C_1$ | 1628.25 | 92.39 |
| 285610 | 0 | $C_1$ | 1605.17 | 69.32 | 275365 | 1 | $C_1$ | 1628.25 | 92.40 |
| 285818 | 0 | $C_1$ | 1605.20 | 69.34 | 281538 | 2 | $C_1$ | 1628.26 | 92.41 |
| 277304 | 2 | $C_1$ | 1605.22 | 69.36 | 263112 | 2 | $C_1$ | 1628.27 | 92.41 |
| 285906 | 0 | $C_2$ | 1605.26 | 69.40 | 244085 | 2 | $C_1$ | 1628.27 | 92.42 |
| 285879 | 0 | $C_1$ | 1605.29 | 69.43 | 284954 | 2 | $C_1$ | 1628.28 | 92.43 |
| 266014 | 2 | $C_1$ | 1605.34 | 69.48 | 256762 | 1 | $C_1$ | 1628.28 | 92.43 |
| 275970 | 1 | $C_1$ | 1605.36 | 69.50 | 187863 | 2 | $C_1$ | 1628.29 | 92.43 |
| 285592 | 0 | $C_1$ | 1605.36 | 69.50 | 279055 | 1 | $C_1$ | 1628.29 | 92.44 |
| 251613 | 1 | $C_1$ | 1605.41 | 69.56 | 269743 | 2 | $C_1$ | 1628.30 | 92.45 |
| 265877 | 1 | $C_1$ | 1605.43 | 69.57 | 221194 | 1 | $C_1$ | 1628.30 | 92.45 |
| 284712 | 1 | $C_1$ | 1605.44 | 69.59 | 263579 | 2 | $C_1$ | 1628.30 | 92.45 |
| 273995 | 1 | $C_1$ | 1605.46 | 69.61 | 266192 | 2 | $C_1$ | 1628.31 | 92.45 |
| 211188 | 1 | $C_1$ | 1605.48 | 69.63 | 276234 | 2 | $C_1$ | 1628.31 | 92.46 |

|        |   |       |         |       |        |   |       |         |       |
|--------|---|-------|---------|-------|--------|---|-------|---------|-------|
| 285169 | 2 | $C_1$ | 1605.50 | 69.65 | 282007 | 2 | $C_1$ | 1628.31 | 92.46 |
| 284365 | 1 | $C_1$ | 1605.51 | 69.66 | 265641 | 2 | $C_1$ | 1628.32 | 92.46 |
| 285694 | 0 | $C_1$ | 1605.53 | 69.68 | 254034 | 2 | $C_1$ | 1628.32 | 92.46 |
| 266575 | 1 | $C_1$ | 1605.54 | 69.69 | 206339 | 2 | $C_1$ | 1628.32 | 92.46 |
| 275172 | 1 | $C_1$ | 1605.54 | 69.69 | 268499 | 2 | $C_1$ | 1628.34 | 92.48 |
| 269038 | 1 | $C_1$ | 1605.57 | 69.72 | 282859 | 2 | $C_1$ | 1628.34 | 92.49 |
| 265833 | 2 | $C_1$ | 1605.58 | 69.73 | 227582 | 2 | $C_1$ | 1628.35 | 92.50 |
| 285658 | 0 | $C_1$ | 1605.61 | 69.76 | 203230 | 1 | $C_1$ | 1628.35 | 92.50 |
| 276067 | 2 | $C_1$ | 1605.66 | 69.80 | 276559 | 2 | $C_1$ | 1628.36 | 92.50 |
| 285439 | 1 | $C_2$ | 1605.70 | 69.84 | 212601 | 2 | $C_1$ | 1628.36 | 92.51 |
| 278862 | 1 | $C_1$ | 1605.70 | 69.85 | 279774 | 1 | $C_1$ | 1628.37 | 92.51 |
| 284339 | 1 | $C_1$ | 1605.71 | 69.85 | 276061 | 2 | $C_1$ | 1628.37 | 92.51 |
| 282864 | 1 | $C_1$ | 1605.71 | 69.85 | 263751 | 1 | $C_1$ | 1628.40 | 92.54 |
| 268477 | 1 | $C_1$ | 1605.71 | 69.86 | 215733 | 2 | $C_1$ | 1628.40 | 92.55 |
| 256642 | 1 | $C_1$ | 1605.75 | 69.89 | 236073 | 2 | $C_1$ | 1628.41 | 92.56 |
| 284316 | 1 | $C_1$ | 1605.78 | 69.92 | 214312 | 1 | $C_1$ | 1628.42 | 92.56 |
| 285710 | 0 | $C_1$ | 1605.78 | 69.93 | 280839 | 1 | $C_1$ | 1628.42 | 92.57 |
| 282347 | 2 | $C_1$ | 1605.79 | 69.93 | 213679 | 2 | $C_1$ | 1628.42 | 92.57 |
| 283433 | 2 | $C_1$ | 1605.81 | 69.95 | 235983 | 2 | $C_1$ | 1628.43 | 92.57 |
| 252578 | 1 | $C_1$ | 1605.85 | 70.00 | 243056 | 1 | $C_2$ | 1628.43 | 92.57 |
| 268653 | 1 | $C_1$ | 1605.85 | 70.00 | 222660 | 1 | $C_1$ | 1628.43 | 92.58 |
| 285709 | 0 | $C_1$ | 1605.86 | 70.01 | 282848 | 1 | $C_1$ | 1628.44 | 92.58 |

|        |   |       |         |       |        |   |       |         |       |
|--------|---|-------|---------|-------|--------|---|-------|---------|-------|
| 276268 | 2 | $C_1$ | 1605.89 | 70.03 | 253272 | 1 | $C_1$ | 1628.45 | 92.60 |
| 214149 | 1 | $C_1$ | 1605.91 | 70.05 | 278391 | 1 | $C_2$ | 1628.46 | 92.60 |
| 213139 | 1 | $C_1$ | 1605.91 | 70.06 | 284670 | 1 | $C_1$ | 1628.46 | 92.61 |
| 281626 | 1 | $C_1$ | 1605.91 | 70.06 | 151300 | 2 | $C_1$ | 1628.47 | 92.62 |
| 214179 | 1 | $C_1$ | 1605.94 | 70.08 | 251381 | 1 | $C_1$ | 1628.48 | 92.62 |
| 268506 | 1 | $C_1$ | 1605.94 | 70.09 | 242164 | 1 | $C_1$ | 1628.48 | 92.62 |
| 282922 | 2 | $C_1$ | 1605.95 | 70.10 | 271926 | 2 | $C_1$ | 1628.49 | 92.63 |
| 285370 | 2 | $C_1$ | 1605.97 | 70.11 | 258407 | 1 | $C_1$ | 1628.49 | 92.63 |
| 282162 | 1 | $C_1$ | 1605.98 | 70.13 | 269096 | 2 | $C_1$ | 1628.51 | 92.65 |
| 277697 | 1 | $C_1$ | 1606.08 | 70.22 | 215648 | 1 | $C_1$ | 1628.51 | 92.65 |
| 276209 | 2 | $C_1$ | 1606.12 | 70.26 | 282527 | 2 | $C_1$ | 1628.52 | 92.66 |
| 284304 | 1 | $C_1$ | 1606.14 | 70.28 | 227669 | 1 | $C_1$ | 1628.52 | 92.66 |
| 282860 | 1 | $C_1$ | 1606.14 | 70.28 | 189318 | 2 | $C_1$ | 1628.53 | 92.68 |
| 269143 | 1 | $C_1$ | 1606.15 | 70.30 | 277094 | 2 | $C_1$ | 1628.55 | 92.69 |
| 285786 | 0 | $C_1$ | 1606.18 | 70.33 | 253631 | 2 | $C_1$ | 1628.55 | 92.70 |
| 285587 | 0 | $C_1$ | 1606.21 | 70.36 | 232078 | 1 | $C_1$ | 1628.55 | 92.70 |
| 284325 | 1 | $C_1$ | 1606.22 | 70.36 | 265738 | 2 | $C_1$ | 1628.56 | 92.71 |
| 285861 | 0 | $C_1$ | 1606.22 | 70.37 | 214754 | 2 | $C_1$ | 1628.56 | 92.71 |
| 268476 | 1 | $C_1$ | 1606.25 | 70.40 | 271182 | 2 | $C_1$ | 1628.57 | 92.71 |
| 251169 | 1 | $C_1$ | 1606.27 | 70.42 | 253681 | 2 | $C_1$ | 1628.57 | 92.71 |
| 276245 | 1 | $C_1$ | 1606.28 | 70.42 | 282810 | 2 | $C_1$ | 1628.57 | 92.71 |
| 213859 | 1 | $C_1$ | 1606.30 | 70.44 | 263219 | 2 | $C_1$ | 1628.57 | 92.72 |

|        |   |       |         |       |        |   |       |         |       |
|--------|---|-------|---------|-------|--------|---|-------|---------|-------|
| 285162 | 1 | $C_I$ | 1606.30 | 70.44 | 203672 | 2 | $C_I$ | 1628.58 | 92.72 |
| 285657 | 0 | $C_I$ | 1606.32 | 70.46 | 215720 | 2 | $C_I$ | 1628.58 | 92.73 |
| 250281 | 1 | $C_I$ | 1606.35 | 70.50 | 282302 | 2 | $C_I$ | 1628.59 | 92.74 |
| 251185 | 1 | $C_I$ | 1606.39 | 70.54 | 266582 | 2 | $C_I$ | 1628.59 | 92.74 |
| 203466 | 1 | $C_I$ | 1606.40 | 70.54 | 240861 | 2 | $C_I$ | 1628.59 | 92.74 |
| 228817 | 1 | $C_I$ | 1606.51 | 70.65 | 251229 | 2 | $C_I$ | 1628.60 | 92.74 |
| 282053 | 1 | $C_I$ | 1606.52 | 70.66 | 240462 | 2 | $C_I$ | 1628.60 | 92.74 |
| 283075 | 1 | $C_I$ | 1606.53 | 70.68 | 247266 | 2 | $C_I$ | 1628.61 | 92.75 |
| 284307 | 1 | $C_I$ | 1606.55 | 70.69 | 205602 | 1 | $C_I$ | 1628.62 | 92.77 |
| 276922 | 1 | $C_I$ | 1606.59 | 70.74 | 236576 | 1 | $C_I$ | 1628.63 | 92.78 |
| 283102 | 1 | $C_I$ | 1606.60 | 70.74 | 274805 | 2 | $C_I$ | 1628.63 | 92.78 |
| 208316 | 1 | $C_I$ | 1606.64 | 70.78 | 267242 | 2 | $C_I$ | 1628.63 | 92.78 |
| 253787 | 1 | $C_I$ | 1606.65 | 70.79 | 239970 | 1 | $C_I$ | 1628.64 | 92.78 |
| 285632 | 0 | $C_I$ | 1606.66 | 70.81 | 239904 | 2 | $C_I$ | 1628.65 | 92.79 |
| 224131 | 1 | $C_I$ | 1606.68 | 70.82 | 236021 | 2 | $C_I$ | 1628.66 | 92.81 |
| 276359 | 1 | $C_I$ | 1606.74 | 70.88 | 252749 | 2 | $C_I$ | 1628.66 | 92.81 |
| 283399 | 1 | $C_I$ | 1606.76 | 70.91 | 284976 | 1 | $C_I$ | 1628.67 | 92.81 |
| 235742 | 1 | $C_I$ | 1606.76 | 70.91 | 284526 | 1 | $C_I$ | 1628.67 | 92.81 |
| 280109 | 1 | $C_I$ | 1606.88 | 71.03 | 248358 | 1 | $C_I$ | 1628.67 | 92.81 |
| 269397 | 1 | $C_I$ | 1606.89 | 71.03 | 268605 | 1 | $C_I$ | 1628.67 | 92.82 |
| 284330 | 1 | $C_I$ | 1606.89 | 71.04 | 237612 | 1 | $C_I$ | 1628.67 | 92.82 |
| 276356 | 1 | $C_I$ | 1606.90 | 71.04 | 201737 | 2 | $C_I$ | 1628.70 | 92.84 |



|        |   |       |         |       |        |   |       |         |       |
|--------|---|-------|---------|-------|--------|---|-------|---------|-------|
| 212114 | 1 | $C_I$ | 1606.91 | 71.06 | 235772 | 1 | $C_I$ | 1628.71 | 92.86 |
| 285473 | 0 | $C_I$ | 1606.94 | 71.08 | 236025 | 2 | $C_I$ | 1628.72 | 92.87 |
| 285721 | 0 | $C_I$ | 1607.03 | 71.18 | 252730 | 2 | $C_I$ | 1628.72 | 92.87 |
| 285378 | 2 | $C_I$ | 1607.04 | 71.18 | 265747 | 2 | $C_I$ | 1628.73 | 92.88 |
| 285575 | 0 | $C_I$ | 1607.05 | 71.19 | 242165 | 1 | $C_I$ | 1628.74 | 92.88 |
| 275371 | 1 | $C_I$ | 1607.06 | 71.20 | 239327 | 1 | $C_I$ | 1628.75 | 92.90 |
| 285686 | 0 | $C_I$ | 1607.08 | 71.22 | 273305 | 1 | $C_I$ | 1628.76 | 92.90 |
| 285665 | 0 | $C_I$ | 1607.09 | 71.24 | 263090 | 2 | $C_I$ | 1628.77 | 92.91 |
| 255865 | 1 | $C_I$ | 1607.11 | 71.25 | 251014 | 1 | $C_I$ | 1628.78 | 92.92 |
| 285804 | 0 | $C_I$ | 1607.11 | 71.26 | 267205 | 2 | $C_I$ | 1628.78 | 92.93 |
| 281425 | 1 | $C_I$ | 1607.12 | 71.27 | 284735 | 1 | $C_I$ | 1628.78 | 92.93 |
| 276224 | 1 | $C_I$ | 1607.14 | 71.28 | 273261 | 1 | $C_I$ | 1628.79 | 92.93 |
| 285802 | 0 | $C_I$ | 1607.22 | 71.36 | 274732 | 1 | $C_I$ | 1628.79 | 92.93 |
| 212107 | 1 | $C_I$ | 1607.25 | 71.40 | 263705 | 1 | $C_I$ | 1628.79 | 92.93 |
| 281360 | 1 | $C_I$ | 1607.27 | 71.41 | 276260 | 2 | $C_I$ | 1628.80 | 92.94 |
| 252929 | 1 | $C_I$ | 1607.32 | 71.46 | 252784 | 2 | $C_I$ | 1628.81 | 92.96 |
| 228526 | 1 | $C_I$ | 1607.32 | 71.46 | 282073 | 2 | $C_I$ | 1628.82 | 92.96 |
| 265656 | 1 | $C_I$ | 1607.37 | 71.52 | 212938 | 2 | $C_I$ | 1628.82 | 92.96 |
| 279052 | 1 | $C_I$ | 1607.38 | 71.52 | 212429 | 2 | $C_I$ | 1628.83 | 92.97 |
| 284683 | 1 | $C_I$ | 1607.46 | 71.60 | 247261 | 2 | $C_I$ | 1628.83 | 92.98 |
| 215037 | 1 | $C_I$ | 1607.52 | 71.66 | 181938 | 2 | $C_I$ | 1628.83 | 92.98 |
| 231206 | 1 | $C_I$ | 1607.52 | 71.67 | 278564 | 1 | $C_I$ | 1628.84 | 92.98 |

|        |   |       |         |       |        |   |       |         |       |
|--------|---|-------|---------|-------|--------|---|-------|---------|-------|
| 284364 | 1 | $C_1$ | 1607.65 | 71.79 | 282724 | 2 | $C_1$ | 1628.85 | 92.99 |
| 252737 | 1 | $C_1$ | 1607.69 | 71.83 | 212076 | 2 | $C_1$ | 1628.85 | 93.00 |
| 283418 | 2 | $C_1$ | 1607.69 | 71.84 | 282022 | 2 | $C_1$ | 1628.85 | 93.00 |
| 285814 | 0 | $C_1$ | 1607.72 | 71.87 | 285250 | 2 | $C_1$ | 1628.85 | 93.00 |
| 219551 | 1 | $C_1$ | 1607.73 | 71.88 | 273485 | 1 | $C_1$ | 1628.86 | 93.00 |
| 278968 | 1 | $C_1$ | 1607.79 | 71.93 | 213561 | 2 | $C_1$ | 1628.86 | 93.00 |
| 215029 | 1 | $C_1$ | 1607.82 | 71.97 | 275678 | 2 | $C_1$ | 1628.86 | 93.01 |
| 270899 | 1 | $C_1$ | 1607.86 | 72.01 | 254012 | 1 | $C_1$ | 1628.86 | 93.01 |
| 222903 | 1 | $C_1$ | 1607.86 | 72.01 | 262431 | 1 | $C_1$ | 1628.87 | 93.01 |
| 237571 | 1 | $C_1$ | 1607.88 | 72.03 | 244049 | 1 | $C_1$ | 1628.87 | 93.01 |
| 285567 | 0 | $C_1$ | 1607.89 | 72.04 | 214110 | 1 | $C_1$ | 1628.87 | 93.02 |
| 285191 | 1 | $C_1$ | 1607.90 | 72.05 | 285620 | 0 | $C_1$ | 1628.88 | 93.02 |
| 285628 | 0 | $C_1$ | 1607.93 | 72.07 | 265943 | 2 | $C_1$ | 1628.88 | 93.02 |
| 214852 | 1 | $C_1$ | 1607.96 | 72.10 | 270431 | 2 | $C_1$ | 1628.88 | 93.02 |
| 285647 | 0 | $C_1$ | 1607.98 | 72.12 | 227359 | 2 | $C_1$ | 1628.88 | 93.02 |
| 284363 | 1 | $C_1$ | 1607.98 | 72.13 | 267196 | 2 | $C_1$ | 1628.88 | 93.03 |
| 266039 | 1 | $C_1$ | 1608.00 | 72.15 | 228721 | 1 | $C_1$ | 1628.88 | 93.03 |
| 221107 | 1 | $C_1$ | 1608.03 | 72.18 | 285519 | 0 | $C_1$ | 1628.88 | 93.03 |
| 285175 | 1 | $C_1$ | 1608.04 | 72.19 | 273263 | 2 | $C_1$ | 1628.89 | 93.04 |
| 277066 | 1 | $C_1$ | 1608.11 | 72.25 | 271017 | 2 | $C_1$ | 1628.89 | 93.04 |
| 283061 | 1 | $C_1$ | 1608.12 | 72.26 | 204794 | 2 | $C_1$ | 1628.90 | 93.04 |
| 285901 | 0 | $D_2$ | 1608.13 | 72.27 | 262797 | 2 | $C_1$ | 1628.90 | 93.05 |

|        |   |       |         |       |        |   |       |         |       |
|--------|---|-------|---------|-------|--------|---|-------|---------|-------|
| 285131 | 1 | $C_I$ | 1608.17 | 72.32 | 231213 | 2 | $C_I$ | 1628.91 | 93.05 |
| 251177 | 1 | $C_I$ | 1608.26 | 72.40 | 284312 | 1 | $C_I$ | 1628.91 | 93.06 |
| 270927 | 1 | $C_I$ | 1608.26 | 72.40 | 285548 | 0 | $C_S$ | 1628.91 | 93.06 |
| 212091 | 2 | $C_I$ | 1608.28 | 72.42 | 271674 | 2 | $C_I$ | 1628.92 | 93.06 |
| 285612 | 0 | $C_2$ | 1608.29 | 72.44 | 274721 | 2 | $C_I$ | 1628.92 | 93.07 |
| 285588 | 0 | $C_I$ | 1608.30 | 72.44 | 229574 | 2 | $C_I$ | 1628.93 | 93.07 |
| 276046 | 2 | $C_I$ | 1608.31 | 72.46 | 266534 | 1 | $C_I$ | 1628.93 | 93.07 |
| 282244 | 2 | $C_I$ | 1608.36 | 72.51 | 282229 | 1 | $C_I$ | 1628.93 | 93.07 |
| 284915 | 1 | $C_I$ | 1608.36 | 72.51 | 279678 | 1 | $C_I$ | 1628.93 | 93.08 |
| 214791 | 1 | $C_I$ | 1608.37 | 72.52 | 282528 | 2 | $C_I$ | 1628.94 | 93.08 |
| 285570 | 0 | $C_I$ | 1608.38 | 72.52 | 269785 | 2 | $C_I$ | 1628.94 | 93.08 |
| 285599 | 0 | $C_I$ | 1608.39 | 72.53 | 258668 | 2 | $C_I$ | 1628.95 | 93.10 |
| 269375 | 1 | $C_I$ | 1608.41 | 72.55 | 276115 | 2 | $C_I$ | 1628.96 | 93.10 |
| 285616 | 0 | $C_I$ | 1608.41 | 72.56 | 268810 | 2 | $C_I$ | 1628.96 | 93.10 |
| 283054 | 1 | $C_I$ | 1608.42 | 72.57 | 284755 | 2 | $C_I$ | 1628.97 | 93.12 |
| 285822 | 0 | $C_I$ | 1608.42 | 72.57 | 250905 | 2 | $C_I$ | 1628.97 | 93.12 |
| 268512 | 2 | $C_I$ | 1608.43 | 72.58 | 265444 | 2 | $C_I$ | 1628.98 | 93.12 |
| 252918 | 1 | $C_I$ | 1608.43 | 72.58 | 283886 | 1 | $C_2$ | 1628.98 | 93.13 |
| 279002 | 1 | $C_I$ | 1608.44 | 72.58 | 282412 | 2 | $C_I$ | 1629.00 | 93.14 |
| 283224 | 1 | $C_I$ | 1608.44 | 72.59 | 255987 | 1 | $C_I$ | 1629.01 | 93.15 |
| 285692 | 0 | $C_I$ | 1608.45 | 72.59 | 247251 | 1 | $C_I$ | 1629.01 | 93.15 |
| 212118 | 1 | $C_I$ | 1608.47 | 72.62 | 254801 | 2 | $C_I$ | 1629.01 | 93.16 |

|        |   |       |         |       |        |   |       |         |       |
|--------|---|-------|---------|-------|--------|---|-------|---------|-------|
| 282161 | 1 | $C_1$ | 1608.48 | 72.63 | 226809 | 2 | $C_1$ | 1629.02 | 93.16 |
| 285726 | 0 | $C_1$ | 1608.50 | 72.64 | 253575 | 1 | $C_1$ | 1629.02 | 93.16 |
| 284714 | 1 | $C_1$ | 1608.52 | 72.66 | 285267 | 1 | $C_1$ | 1629.03 | 93.17 |
| 269742 | 1 | $C_1$ | 1608.53 | 72.68 | 237122 | 1 | $C_1$ | 1629.03 | 93.18 |
| 213953 | 1 | $C_1$ | 1608.58 | 72.72 | 283561 | 2 | $C_1$ | 1629.03 | 93.18 |
| 282320 | 2 | $C_1$ | 1608.62 | 72.76 | 226541 | 1 | $C_1$ | 1629.04 | 93.18 |
| 252806 | 1 | $C_1$ | 1608.64 | 72.79 | 212359 | 2 | $C_1$ | 1629.04 | 93.18 |
| 276362 | 1 | $C_1$ | 1608.64 | 72.79 | 265797 | 2 | $C_1$ | 1629.04 | 93.18 |
| 282084 | 1 | $C_1$ | 1608.66 | 72.81 | 232461 | 1 | $C_1$ | 1629.05 | 93.19 |
| 213971 | 1 | $C_1$ | 1608.69 | 72.83 | 284836 | 2 | $C_1$ | 1629.05 | 93.20 |
| 281323 | 1 | $C_1$ | 1608.74 | 72.88 | 273904 | 1 | $C_1$ | 1629.07 | 93.21 |
| 285789 | 0 | $C_2$ | 1608.75 | 72.89 | 213231 | 2 | $C_1$ | 1629.09 | 93.24 |
| 277326 | 2 | $C_1$ | 1608.75 | 72.89 | 280130 | 1 | $C_1$ | 1629.09 | 93.24 |
| 281424 | 1 | $C_1$ | 1608.79 | 72.93 | 264444 | 1 | $C_1$ | 1629.11 | 93.26 |
| 283524 | 1 | $C_1$ | 1608.83 | 72.98 | 282571 | 2 | $C_1$ | 1629.12 | 93.26 |
| 282187 | 1 | $C_1$ | 1608.83 | 72.98 | 264360 | 1 | $C_1$ | 1629.13 | 93.27 |
| 285886 | 0 | $C_1$ | 1608.86 | 73.00 | 284878 | 1 | $C_1$ | 1629.13 | 93.27 |
| 204623 | 1 | $C_1$ | 1608.87 | 73.01 | 265578 | 2 | $C_1$ | 1629.13 | 93.27 |
| 270413 | 1 | $C_1$ | 1608.87 | 73.02 | 225739 | 1 | $C_1$ | 1629.14 | 93.28 |
| 278686 | 1 | $C_1$ | 1608.91 | 73.05 | 254912 | 2 | $C_1$ | 1629.14 | 93.28 |
| 232453 | 1 | $C_1$ | 1608.93 | 73.07 | 265750 | 2 | $C_1$ | 1629.15 | 93.29 |
| 239865 | 1 | $C_1$ | 1608.93 | 73.08 | 239348 | 1 | $C_1$ | 1629.15 | 93.30 |

|        |   |       |         |       |        |   |       |         |       |
|--------|---|-------|---------|-------|--------|---|-------|---------|-------|
| 273994 | 1 | $C_I$ | 1608.95 | 73.09 | 277872 | 2 | $C_I$ | 1629.16 | 93.30 |
| 256588 | 1 | $C_I$ | 1608.96 | 73.11 | 262516 | 1 | $C_I$ | 1629.16 | 93.30 |
| 203495 | 1 | $C_I$ | 1608.97 | 73.12 | 266740 | 2 | $C_I$ | 1629.16 | 93.31 |
| 273924 | 1 | $C_I$ | 1609.00 | 73.14 | 274000 | 1 | $C_I$ | 1629.17 | 93.31 |
| 285798 | 0 | $C_I$ | 1609.02 | 73.16 | 243856 | 2 | $C_I$ | 1629.17 | 93.31 |
| 277348 | 1 | $C_I$ | 1609.09 | 73.23 | 252691 | 1 | $C_I$ | 1629.17 | 93.31 |
| 285201 | 2 | $C_I$ | 1609.09 | 73.24 | 284445 | 2 | $C_I$ | 1629.17 | 93.32 |
| 285718 | 0 | $C_I$ | 1609.13 | 73.27 | 237199 | 2 | $C_I$ | 1629.19 | 93.34 |
| 285685 | 0 | $C_I$ | 1609.16 | 73.31 | 270910 | 1 | $C_I$ | 1629.20 | 93.34 |
| 276220 | 2 | $C_I$ | 1609.19 | 73.34 | 267294 | 2 | $C_I$ | 1629.20 | 93.35 |
| 282632 | 1 | $C_I$ | 1609.19 | 73.34 | 213566 | 2 | $C_I$ | 1629.21 | 93.36 |
| 284332 | 1 | $C_I$ | 1609.20 | 73.34 | 266738 | 2 | $C_I$ | 1629.21 | 93.36 |
| 277279 | 1 | $C_I$ | 1609.23 | 73.37 | 193877 | 2 | $C_I$ | 1629.22 | 93.37 |
| 285877 | 0 | $C_S$ | 1609.27 | 73.41 | 283297 | 2 | $C_I$ | 1629.22 | 93.37 |
| 285766 | 0 | $C_I$ | 1609.30 | 73.44 | 263265 | 2 | $C_I$ | 1629.22 | 93.37 |
| 214183 | 1 | $C_I$ | 1609.30 | 73.44 | 237449 | 1 | $C_I$ | 1629.22 | 93.37 |
| 284358 | 1 | $C_I$ | 1609.35 | 73.50 | 283916 | 2 | $C_I$ | 1629.22 | 93.37 |
| 247259 | 1 | $C_I$ | 1609.37 | 73.52 | 229298 | 2 | $C_I$ | 1629.23 | 93.37 |
| 211187 | 1 | $C_I$ | 1609.40 | 73.54 | 270906 | 1 | $C_I$ | 1629.24 | 93.39 |
| 235137 | 1 | $C_I$ | 1609.42 | 73.56 | 253313 | 2 | $C_I$ | 1629.25 | 93.39 |
| 283734 | 1 | $C_I$ | 1609.43 | 73.58 | 256638 | 1 | $C_I$ | 1629.27 | 93.41 |
| 282049 | 2 | $C_I$ | 1609.44 | 73.58 | 214790 | 1 | $C_I$ | 1629.27 | 93.41 |

|        |   |       |         |       |        |   |       |         |       |
|--------|---|-------|---------|-------|--------|---|-------|---------|-------|
| 250908 | 1 | $C_1$ | 1609.45 | 73.60 | 236340 | 2 | $C_1$ | 1629.28 | 93.42 |
| 285569 | 0 | $C_1$ | 1609.48 | 73.63 | 281616 | 1 | $C_1$ | 1629.28 | 93.42 |
| 282866 | 1 | $C_1$ | 1609.50 | 73.65 | 284620 | 1 | $C_1$ | 1629.28 | 93.43 |
| 276080 | 2 | $C_1$ | 1609.54 | 73.68 | 266087 | 2 | $C_1$ | 1629.28 | 93.43 |
| 282599 | 2 | $C_1$ | 1609.54 | 73.69 | 285593 | 0 | $C_2$ | 1629.29 | 93.43 |
| 275171 | 1 | $C_1$ | 1609.58 | 73.72 | 219566 | 2 | $C_1$ | 1629.30 | 93.44 |
| 282349 | 1 | $C_1$ | 1609.59 | 73.73 | 234821 | 1 | $C_1$ | 1629.30 | 93.44 |
| 272414 | 1 | $C_1$ | 1609.59 | 73.74 | 284525 | 1 | $C_1$ | 1629.30 | 93.45 |
| 265725 | 2 | $C_1$ | 1609.62 | 73.77 | 206421 | 2 | $C_1$ | 1629.33 | 93.48 |
| 282169 | 1 | $C_1$ | 1609.64 | 73.78 | 282426 | 1 | $C_1$ | 1629.33 | 93.48 |
| 242166 | 1 | $C_1$ | 1609.65 | 73.79 | 275647 | 2 | $C_1$ | 1629.34 | 93.48 |
| 282597 | 1 | $C_1$ | 1609.66 | 73.81 | 226531 | 2 | $C_1$ | 1629.34 | 93.48 |
| 284717 | 1 | $C_1$ | 1609.67 | 73.82 | 242336 | 1 | $C_1$ | 1629.35 | 93.50 |
| 284702 | 1 | $C_1$ | 1609.70 | 73.85 | 229841 | 2 | $C_1$ | 1629.35 | 93.50 |
| 282817 | 1 | $C_1$ | 1609.73 | 73.87 | 280503 | 1 | $C_1$ | 1629.36 | 93.50 |
| 226830 | 1 | $C_1$ | 1609.74 | 73.89 | 270526 | 1 | $C_1$ | 1629.36 | 93.51 |
| 285634 | 0 | $C_1$ | 1609.78 | 73.92 | 250163 | 2 | $C_1$ | 1629.37 | 93.51 |
| 277720 | 1 | $C_1$ | 1609.79 | 73.93 | 283912 | 1 | $C_1$ | 1629.37 | 93.51 |
| 218881 | 1 | $C_1$ | 1609.79 | 73.94 | 275952 | 1 | $C_1$ | 1629.37 | 93.52 |
| 262960 | 1 | $C_1$ | 1609.82 | 73.96 | 203781 | 2 | $C_1$ | 1629.38 | 93.52 |
| 284696 | 1 | $C_1$ | 1609.83 | 73.97 | 280441 | 2 | $C_1$ | 1629.38 | 93.52 |
| 275450 | 1 | $C_1$ | 1609.86 | 74.00 | 279928 | 1 | $C_1$ | 1629.38 | 93.52 |

|        |   |       |         |       |        |   |       |         |       |
|--------|---|-------|---------|-------|--------|---|-------|---------|-------|
| 285701 | 0 | $C_I$ | 1609.87 | 74.02 | 248359 | 1 | $C_I$ | 1629.38 | 93.53 |
| 269367 | 1 | $C_I$ | 1609.92 | 74.07 | 270867 | 2 | $C_I$ | 1629.39 | 93.54 |
| 270932 | 1 | $C_I$ | 1609.93 | 74.07 | 253629 | 2 | $C_I$ | 1629.39 | 93.54 |
| 276238 | 1 | $C_I$ | 1610.02 | 74.16 | 282569 | 2 | $C_I$ | 1629.40 | 93.54 |
| 254239 | 1 | $C_I$ | 1610.04 | 74.19 | 283690 | 2 | $C_I$ | 1629.40 | 93.55 |
| 285661 | 0 | $C_I$ | 1610.05 | 74.20 | 236080 | 2 | $C_I$ | 1629.40 | 93.55 |
| 282535 | 2 | $C_I$ | 1610.13 | 74.27 | 268822 | 2 | $C_I$ | 1629.41 | 93.55 |
| 267184 | 1 | $C_I$ | 1610.13 | 74.28 | 278699 | 2 | $C_I$ | 1629.41 | 93.55 |
| 282740 | 1 | $C_I$ | 1610.14 | 74.29 | 237428 | 1 | $C_I$ | 1629.41 | 93.56 |
| 277063 | 1 | $C_I$ | 1610.16 | 74.30 | 236191 | 2 | $C_I$ | 1629.42 | 93.56 |
| 282831 | 1 | $C_I$ | 1610.17 | 74.31 | 285373 | 1 | $C_I$ | 1629.42 | 93.57 |
| 269046 | 1 | $C_I$ | 1610.17 | 74.31 | 229095 | 2 | $C_I$ | 1629.44 | 93.58 |
| 285695 | 0 | $C_I$ | 1610.17 | 74.31 | 267041 | 2 | $C_I$ | 1629.44 | 93.58 |
| 236585 | 1 | $C_I$ | 1610.20 | 74.34 | 274519 | 2 | $C_I$ | 1629.44 | 93.58 |
| 285170 | 2 | $C_I$ | 1610.21 | 74.35 | 255862 | 2 | $C_I$ | 1629.44 | 93.59 |
| 236015 | 2 | $C_I$ | 1610.22 | 74.36 | 284292 | 1 | $C_I$ | 1629.45 | 93.59 |
| 284850 | 1 | $C_I$ | 1610.22 | 74.37 | 212235 | 2 | $C_I$ | 1629.46 | 93.61 |
| 285376 | 1 | $C_I$ | 1610.24 | 74.38 | 237128 | 2 | $C_I$ | 1629.47 | 93.61 |
| 252610 | 1 | $C_I$ | 1610.29 | 74.44 | 282978 | 1 | $C_I$ | 1629.47 | 93.61 |
| 237591 | 1 | $C_I$ | 1610.29 | 74.44 | 254155 | 1 | $C_I$ | 1629.49 | 93.64 |
| 277068 | 2 | $C_I$ | 1610.33 | 74.48 | 278906 | 2 | $C_I$ | 1629.50 | 93.64 |
| 203267 | 1 | $C_I$ | 1610.34 | 74.49 | 278418 | 2 | $C_I$ | 1629.50 | 93.64 |

|        |   |       |         |       |        |   |       |         |       |
|--------|---|-------|---------|-------|--------|---|-------|---------|-------|
| 270928 | 1 | $C_1$ | 1610.37 | 74.52 | 285450 | 1 | $C_1$ | 1629.50 | 93.64 |
| 285696 | 0 | $C_1$ | 1610.38 | 74.53 | 284288 | 2 | $C_1$ | 1629.50 | 93.65 |
| 276231 | 1 | $C_1$ | 1610.40 | 74.54 | 278626 | 2 | $C_1$ | 1629.51 | 93.66 |
| 285480 | 0 | $C_1$ | 1610.40 | 74.55 | 229087 | 2 | $C_1$ | 1629.53 | 93.67 |
| 276511 | 1 | $C_1$ | 1610.46 | 74.60 | 269288 | 1 | $C_1$ | 1629.53 | 93.68 |
| 285778 | 0 | $C_1$ | 1610.47 | 74.62 | 252746 | 1 | $C_1$ | 1629.53 | 93.68 |
| 252811 | 1 | $C_1$ | 1610.48 | 74.62 | 197176 | 2 | $C_1$ | 1629.53 | 93.68 |
| 265842 | 2 | $C_1$ | 1610.50 | 74.64 | 262354 | 2 | $C_1$ | 1629.54 | 93.68 |
| 283200 | 2 | $C_1$ | 1610.50 | 74.65 | 269052 | 2 | $C_1$ | 1629.54 | 93.68 |
| 212102 | 2 | $C_1$ | 1610.50 | 74.65 | 285287 | 1 | $C_1$ | 1629.55 | 93.69 |
| 277345 | 1 | $C_2$ | 1610.51 | 74.65 | 223026 | 2 | $C_1$ | 1629.55 | 93.69 |
| 285604 | 0 | $C_1$ | 1610.52 | 74.66 | 275128 | 1 | $C_1$ | 1629.55 | 93.70 |
| 282096 | 2 | $C_1$ | 1610.53 | 74.67 | 268454 | 1 | $C_1$ | 1629.55 | 93.70 |
| 281356 | 1 | $C_1$ | 1610.53 | 74.68 | 281552 | 2 | $C_1$ | 1629.55 | 93.70 |
| 276934 | 1 | $C_1$ | 1610.57 | 74.71 | 281347 | 1 | $C_1$ | 1629.58 | 93.72 |
| 285576 | 0 | $C_1$ | 1610.57 | 74.71 | 284747 | 2 | $C_1$ | 1629.58 | 93.72 |
| 285173 | 1 | $C_1$ | 1610.58 | 74.72 | 188753 | 2 | $C_1$ | 1629.58 | 93.73 |
| 285184 | 2 | $C_1$ | 1610.59 | 74.73 | 242308 | 2 | $C_1$ | 1629.58 | 93.73 |
| 281713 | 1 | $C_1$ | 1610.59 | 74.74 | 268759 | 2 | $C_1$ | 1629.59 | 93.73 |
| 213198 | 2 | $C_1$ | 1610.66 | 74.81 | 226372 | 2 | $C_1$ | 1629.59 | 93.73 |
| 285352 | 2 | $C_1$ | 1610.67 | 74.82 | 213685 | 2 | $C_1$ | 1629.59 | 93.74 |
| 285379 | 1 | $C_2$ | 1610.67 | 74.82 | 207171 | 2 | $C_1$ | 1629.60 | 93.75 |



|        |   |       |         |       |        |   |       |         |       |
|--------|---|-------|---------|-------|--------|---|-------|---------|-------|
| 285540 | 0 | $C_I$ | 1610.69 | 74.84 | 216469 | 2 | $C_I$ | 1629.61 | 93.75 |
| 275961 | 1 | $C_I$ | 1610.70 | 74.85 | 207704 | 2 | $C_I$ | 1629.61 | 93.76 |
| 281047 | 1 | $C_I$ | 1610.78 | 74.93 | 216156 | 2 | $C_I$ | 1629.62 | 93.76 |
| 282370 | 1 | $C_I$ | 1610.78 | 74.93 | 231879 | 1 | $C_I$ | 1629.62 | 93.77 |
| 285584 | 0 | $C_I$ | 1610.79 | 74.94 | 252548 | 2 | $C_I$ | 1629.63 | 93.77 |
| 276355 | 1 | $C_I$ | 1610.80 | 74.95 | 280210 | 1 | $C_I$ | 1629.64 | 93.78 |
| 205323 | 1 | $C_I$ | 1610.81 | 74.95 | 252524 | 1 | $C_I$ | 1629.64 | 93.78 |
| 231197 | 1 | $C_I$ | 1610.82 | 74.97 | 251649 | 2 | $C_I$ | 1629.64 | 93.79 |
| 276065 | 2 | $C_I$ | 1610.83 | 74.97 | 281441 | 1 | $C_I$ | 1629.64 | 93.79 |
| 280108 | 1 | $C_I$ | 1610.83 | 74.97 | 252946 | 1 | $C_I$ | 1629.65 | 93.80 |
| 215005 | 1 | $C_I$ | 1610.83 | 74.98 | 282751 | 2 | $C_I$ | 1629.65 | 93.80 |
| 273743 | 1 | $C_I$ | 1610.84 | 74.99 | 278260 | 1 | $C_I$ | 1629.66 | 93.81 |
| 236636 | 2 | $C_I$ | 1610.87 | 75.02 | 278323 | 1 | $C_I$ | 1629.66 | 93.81 |
| 227623 | 1 | $C_I$ | 1610.90 | 75.04 | 191683 | 2 | $C_I$ | 1629.67 | 93.81 |
| 236584 | 1 | $C_I$ | 1610.90 | 75.05 | 277330 | 2 | $C_I$ | 1629.67 | 93.82 |
| 285130 | 1 | $C_I$ | 1610.90 | 75.05 | 256552 | 2 | $C_I$ | 1629.68 | 93.83 |
| 282587 | 1 | $C_I$ | 1610.91 | 75.05 | 270432 | 2 | $C_I$ | 1629.68 | 93.83 |
| 284341 | 1 | $C_I$ | 1610.93 | 75.07 | 251779 | 1 | $C_I$ | 1629.69 | 93.84 |
| 285385 | 1 | $C_I$ | 1610.94 | 75.09 | 284021 | 1 | $C_I$ | 1629.69 | 93.84 |
| 281568 | 1 | $C_I$ | 1610.96 | 75.11 | 252651 | 2 | $C_I$ | 1629.70 | 93.84 |
| 251174 | 2 | $C_I$ | 1610.97 | 75.11 | 235974 | 2 | $C_I$ | 1629.70 | 93.84 |
| 236658 | 1 | $C_I$ | 1610.98 | 75.12 | 283439 | 1 | $C_I$ | 1629.70 | 93.85 |

|        |   |       |         |       |        |   |       |         |       |
|--------|---|-------|---------|-------|--------|---|-------|---------|-------|
| 275974 | 2 | $C_I$ | 1610.99 | 75.14 | 265784 | 2 | $C_I$ | 1629.71 | 93.85 |
| 285536 | 0 | $C_I$ | 1611.00 | 75.14 | 208328 | 1 | $C_I$ | 1629.71 | 93.86 |
| 252919 | 1 | $C_I$ | 1611.02 | 75.17 | 284813 | 1 | $C_I$ | 1629.71 | 93.86 |
| 251023 | 1 | $C_I$ | 1611.03 | 75.18 | 280373 | 1 | $C_I$ | 1629.71 | 93.86 |
| 284308 | 1 | $C_I$ | 1611.05 | 75.19 | 203257 | 2 | $C_I$ | 1629.72 | 93.86 |
| 257523 | 1 | $C_I$ | 1611.06 | 75.20 | 277289 | 2 | $C_I$ | 1629.72 | 93.86 |
| 252621 | 2 | $C_I$ | 1611.07 | 75.22 | 281557 | 1 | $C_I$ | 1629.74 | 93.88 |
| 277284 | 1 | $C_I$ | 1611.08 | 75.23 | 203667 | 2 | $C_I$ | 1629.74 | 93.88 |
| 216619 | 2 | $C_I$ | 1611.10 | 75.25 | 276211 | 2 | $C_I$ | 1629.74 | 93.89 |
| 247687 | 1 | $C_I$ | 1611.11 | 75.26 | 266633 | 2 | $C_I$ | 1629.74 | 93.89 |
| 285266 | 1 | $C_I$ | 1611.11 | 75.26 | 223512 | 1 | $C_I$ | 1629.75 | 93.89 |
| 284695 | 1 | $C_I$ | 1611.12 | 75.27 | 251777 | 1 | $C_I$ | 1629.75 | 93.90 |
| 268697 | 2 | $C_I$ | 1611.14 | 75.28 | 275751 | 1 | $C_I$ | 1629.76 | 93.91 |
| 282356 | 2 | $C_I$ | 1611.18 | 75.33 | 282759 | 2 | $C_I$ | 1629.76 | 93.91 |
| 237184 | 1 | $C_I$ | 1611.29 | 75.43 | 270633 | 2 | $C_I$ | 1629.76 | 93.91 |
| 285646 | 0 | $C_I$ | 1611.29 | 75.43 | 269048 | 2 | $C_I$ | 1629.76 | 93.91 |
| 284934 | 2 | $C_I$ | 1611.31 | 75.45 | 212036 | 1 | $C_I$ | 1629.76 | 93.91 |
| 227421 | 1 | $C_I$ | 1611.31 | 75.46 | 215618 | 1 | $C_I$ | 1629.76 | 93.91 |
| 284884 | 1 | $C_I$ | 1611.31 | 75.46 | 278883 | 1 | $C_I$ | 1629.77 | 93.91 |
| 266620 | 1 | $C_I$ | 1611.33 | 75.47 | 280583 | 1 | $C_I$ | 1629.78 | 93.93 |
| 285770 | 0 | $C_I$ | 1611.34 | 75.49 | 285874 | 0 | $C_2$ | 1629.79 | 93.94 |
| 285731 | 0 | $C_I$ | 1611.37 | 75.51 | 267206 | 2 | $C_I$ | 1629.79 | 93.94 |

|        |   |       |         |       |        |   |       |         |       |
|--------|---|-------|---------|-------|--------|---|-------|---------|-------|
| 285153 | 2 | $C_I$ | 1611.37 | 75.52 | 278707 | 2 | $C_I$ | 1629.80 | 93.94 |
| 229591 | 1 | $C_I$ | 1611.38 | 75.53 | 276175 | 2 | $C_I$ | 1629.80 | 93.94 |
| 277092 | 2 | $C_I$ | 1611.43 | 75.58 | 247161 | 1 | $C_I$ | 1629.80 | 93.94 |
| 284843 | 1 | $C_I$ | 1611.43 | 75.58 | 235748 | 2 | $C_I$ | 1629.81 | 93.95 |
| 274873 | 1 | $C_I$ | 1611.44 | 75.59 | 269694 | 2 | $C_I$ | 1629.81 | 93.95 |
| 279751 | 1 | $C_I$ | 1611.47 | 75.62 | 268678 | 2 | $C_I$ | 1629.81 | 93.96 |
| 281431 | 1 | $C_I$ | 1611.49 | 75.63 | 285547 | 0 | $C_I$ | 1629.81 | 93.96 |
| 203488 | 1 | $C_I$ | 1611.52 | 75.66 | 215617 | 1 | $C_I$ | 1629.82 | 93.96 |
| 211875 | 2 | $C_I$ | 1611.55 | 75.69 | 212042 | 2 | $C_I$ | 1629.83 | 93.97 |
| 268760 | 1 | $C_I$ | 1611.58 | 75.72 | 243285 | 1 | $C_I$ | 1629.83 | 93.97 |
| 285784 | 0 | $T$   | 1611.59 | 75.74 | 285176 | 1 | $C_I$ | 1629.85 | 93.99 |
| 283066 | 1 | $C_I$ | 1611.65 | 75.80 | 274069 | 2 | $C_I$ | 1629.85 | 93.99 |
| 276386 | 1 | $C_I$ | 1611.66 | 75.81 | 205642 | 2 | $C_I$ | 1629.86 | 94.00 |
| 214892 | 1 | $C_I$ | 1611.69 | 75.83 | 256654 | 2 | $C_I$ | 1629.86 | 94.01 |
| 251179 | 1 | $C_I$ | 1611.70 | 75.84 | 282365 | 2 | $C_I$ | 1629.88 | 94.02 |
| 285625 | 0 | $C_I$ | 1611.70 | 75.84 | 282182 | 1 | $C_I$ | 1629.88 | 94.02 |
| 268686 | 2 | $C_I$ | 1611.74 | 75.88 | 225284 | 2 | $C_I$ | 1629.89 | 94.03 |
| 282359 | 2 | $C_I$ | 1611.76 | 75.90 | 280186 | 1 | $C_I$ | 1629.89 | 94.03 |
| 284880 | 1 | $C_I$ | 1611.78 | 75.93 | 285882 | 0 | $C_I$ | 1629.89 | 94.04 |
| 239967 | 1 | $C_I$ | 1611.79 | 75.93 | 239974 | 2 | $C_I$ | 1629.90 | 94.05 |
| 285651 | 0 | $C_I$ | 1611.81 | 75.95 | 282009 | 2 | $C_I$ | 1629.90 | 94.05 |
| 276099 | 2 | $C_I$ | 1611.81 | 75.96 | 285742 | 0 | $C_I$ | 1629.91 | 94.06 |

|        |   |       |         |       |        |   |       |         |       |
|--------|---|-------|---------|-------|--------|---|-------|---------|-------|
| 262972 | 1 | $C_I$ | 1611.82 | 75.96 | 283479 | 2 | $C_I$ | 1629.91 | 94.06 |
| 284699 | 1 | $C_I$ | 1611.86 | 76.01 | 280585 | 1 | $C_I$ | 1629.92 | 94.06 |
| 285697 | 0 | $C_I$ | 1611.90 | 76.04 | 229088 | 2 | $C_I$ | 1629.92 | 94.06 |
| 281429 | 1 | $C_I$ | 1611.91 | 76.05 | 273765 | 1 | $C_I$ | 1629.92 | 94.06 |
| 281564 | 1 | $C_I$ | 1611.91 | 76.06 | 267193 | 2 | $C_I$ | 1629.92 | 94.06 |
| 203282 | 2 | $C_I$ | 1611.93 | 76.07 | 262938 | 1 | $C_I$ | 1629.92 | 94.07 |
| 284302 | 1 | $C_I$ | 1611.97 | 76.11 | 265831 | 2 | $C_I$ | 1629.93 | 94.08 |
| 282327 | 2 | $C_I$ | 1611.97 | 76.12 | 208286 | 1 | $C_I$ | 1629.93 | 94.08 |
| 284303 | 1 | $C_I$ | 1611.98 | 76.12 | 212172 | 2 | $C_I$ | 1629.93 | 94.08 |
| 284328 | 1 | $C_I$ | 1611.99 | 76.13 | 282633 | 1 | $C_I$ | 1629.94 | 94.09 |
| 284917 | 1 | $C_I$ | 1612.09 | 76.23 | 276944 | 2 | $C_I$ | 1629.95 | 94.09 |
| 223058 | 1 | $C_I$ | 1612.09 | 76.23 | 267916 | 2 | $C_I$ | 1629.95 | 94.09 |
| 265728 | 1 | $C_I$ | 1612.09 | 76.23 | 235972 | 2 | $C_I$ | 1629.95 | 94.09 |
| 203497 | 1 | $C_I$ | 1612.09 | 76.24 | 281337 | 1 | $C_I$ | 1629.95 | 94.09 |
| 214845 | 1 | $C_I$ | 1612.09 | 76.24 | 246518 | 1 | $C_I$ | 1629.96 | 94.10 |
| 285892 | 0 | $C_2$ | 1612.14 | 76.28 | 282708 | 2 | $C_I$ | 1629.96 | 94.10 |
| 277273 | 1 | $C_I$ | 1612.14 | 76.28 | 237114 | 1 | $C_I$ | 1629.96 | 94.10 |
| 274803 | 1 | $C_I$ | 1612.16 | 76.31 | 228267 | 1 | $C_I$ | 1629.97 | 94.11 |
| 213662 | 1 | $C_I$ | 1612.17 | 76.32 | 279749 | 1 | $C_I$ | 1629.97 | 94.11 |
| 268524 | 1 | $C_I$ | 1612.19 | 76.34 | 284697 | 1 | $C_I$ | 1629.98 | 94.12 |
| 276062 | 2 | $C_I$ | 1612.19 | 76.34 | 220061 | 1 | $C_I$ | 1629.98 | 94.12 |
| 246496 | 1 | $C_I$ | 1612.20 | 76.34 | 285128 | 1 | $C_s$ | 1629.99 | 94.13 |

|        |   |       |         |       |        |   |       |         |       |
|--------|---|-------|---------|-------|--------|---|-------|---------|-------|
| 271212 | 1 | $C_I$ | 1612.20 | 76.35 | 277655 | 1 | $C_2$ | 1630.00 | 94.14 |
| 265806 | 2 | $C_I$ | 1612.21 | 76.36 | 266091 | 1 | $C_I$ | 1630.00 | 94.14 |
| 234804 | 1 | $C_I$ | 1612.23 | 76.37 | 276916 | 2 | $C_I$ | 1630.00 | 94.14 |
| 282279 | 2 | $C_I$ | 1612.23 | 76.37 | 284519 | 1 | $C_I$ | 1630.00 | 94.15 |
| 277069 | 1 | $C_I$ | 1612.23 | 76.37 | 244070 | 2 | $C_I$ | 1630.00 | 94.15 |
| 262935 | 1 | $C_I$ | 1612.24 | 76.39 | 203485 | 2 | $C_I$ | 1630.01 | 94.16 |
| 285274 | 1 | $C_I$ | 1612.25 | 76.40 | 275543 | 1 | $C_I$ | 1630.02 | 94.16 |
| 283193 | 1 | $C_I$ | 1612.27 | 76.41 | 204606 | 2 | $C_I$ | 1630.03 | 94.17 |
| 277065 | 1 | $C_I$ | 1612.29 | 76.43 | 252598 | 2 | $C_I$ | 1630.03 | 94.18 |
| 285258 | 1 | $C_I$ | 1612.29 | 76.43 | 203501 | 2 | $C_I$ | 1630.04 | 94.19 |
| 269552 | 2 | $C_I$ | 1612.29 | 76.44 | 267171 | 2 | $C_I$ | 1630.04 | 94.19 |
| 265823 | 1 | $C_I$ | 1612.30 | 76.44 | 264915 | 2 | $C_I$ | 1630.05 | 94.20 |
| 268505 | 2 | $C_I$ | 1612.30 | 76.44 | 264442 | 2 | $C_I$ | 1630.06 | 94.21 |
| 285335 | 1 | $C_I$ | 1612.31 | 76.45 | 285205 | 2 | $C_I$ | 1630.06 | 94.21 |
| 285638 | 0 | $C_I$ | 1612.33 | 76.47 | 281575 | 2 | $C_I$ | 1630.07 | 94.21 |
| 252785 | 2 | $C_I$ | 1612.33 | 76.47 | 256136 | 2 | $C_I$ | 1630.07 | 94.22 |
| 204076 | 2 | $C_I$ | 1612.34 | 76.49 | 265865 | 2 | $C_I$ | 1630.07 | 94.22 |
| 229667 | 1 | $C_I$ | 1612.36 | 76.50 | 252639 | 2 | $C_I$ | 1630.08 | 94.22 |
| 252622 | 2 | $C_I$ | 1612.36 | 76.51 | 254235 | 2 | $C_I$ | 1630.08 | 94.23 |
| 279714 | 1 | $C_I$ | 1612.36 | 76.51 | 213151 | 2 | $C_I$ | 1630.08 | 94.23 |
| 247258 | 1 | $C_I$ | 1612.37 | 76.51 | 237565 | 1 | $C_I$ | 1630.09 | 94.24 |
| 284937 | 1 | $C_I$ | 1612.45 | 76.59 | 284034 | 1 | $C_I$ | 1630.10 | 94.25 |

|        |   |       |         |       |        |   |       |         |       |
|--------|---|-------|---------|-------|--------|---|-------|---------|-------|
| 281469 | 1 | $C_I$ | 1612.48 | 76.62 | 236183 | 2 | $C_I$ | 1630.11 | 94.25 |
| 285276 | 2 | $C_I$ | 1612.48 | 76.62 | 249968 | 1 | $C_I$ | 1630.11 | 94.26 |
| 282066 | 2 | $C_I$ | 1612.49 | 76.63 | 285209 | 1 | $C_I$ | 1630.11 | 94.26 |
| 273886 | 1 | $C_I$ | 1612.49 | 76.64 | 283173 | 2 | $C_I$ | 1630.13 | 94.28 |
| 284879 | 1 | $C_I$ | 1612.49 | 76.64 | 282997 | 2 | $C_I$ | 1630.14 | 94.28 |
| 243214 | 1 | $C_I$ | 1612.50 | 76.65 | 198632 | 2 | $C_I$ | 1630.14 | 94.28 |
| 269146 | 1 | $C_I$ | 1612.51 | 76.66 | 213773 | 2 | $C_I$ | 1630.14 | 94.28 |
| 251781 | 1 | $C_I$ | 1612.53 | 76.68 | 256967 | 1 | $C_I$ | 1630.17 | 94.31 |
| 285227 | 2 | $C_I$ | 1612.57 | 76.71 | 270908 | 1 | $C_I$ | 1630.17 | 94.32 |
| 248203 | 1 | $C_I$ | 1612.59 | 76.74 | 275174 | 2 | $C_I$ | 1630.18 | 94.33 |
| 278752 | 1 | $C_I$ | 1612.60 | 76.75 | 252448 | 2 | $C_I$ | 1630.19 | 94.33 |
| 285159 | 1 | $C_I$ | 1612.61 | 76.76 | 280146 | 2 | $C_I$ | 1630.19 | 94.33 |
| 282286 | 2 | $C_I$ | 1612.63 | 76.77 | 276528 | 1 | $C_I$ | 1630.19 | 94.34 |
| 282362 | 1 | $C_I$ | 1612.64 | 76.78 | 267151 | 1 | $C_I$ | 1630.20 | 94.35 |
| 280925 | 2 | $C_I$ | 1612.66 | 76.80 | 228384 | 2 | $C_I$ | 1630.20 | 94.35 |
| 254300 | 1 | $C_I$ | 1612.68 | 76.83 | 280508 | 1 | $C_I$ | 1630.21 | 94.35 |
| 276364 | 1 | $C_I$ | 1612.69 | 76.83 | 226390 | 2 | $C_I$ | 1630.21 | 94.36 |
| 284661 | 1 | $C_I$ | 1612.69 | 76.84 | 269057 | 2 | $C_I$ | 1630.21 | 94.36 |
| 252917 | 1 | $C_I$ | 1612.70 | 76.84 | 281367 | 1 | $C_I$ | 1630.22 | 94.37 |
| 203234 | 1 | $C_I$ | 1612.72 | 76.86 | 216169 | 2 | $C_I$ | 1630.23 | 94.37 |
| 281627 | 1 | $C_I$ | 1612.73 | 76.87 | 285883 | 0 | $C_I$ | 1630.23 | 94.38 |
| 284681 | 1 | $C_I$ | 1612.73 | 76.88 | 269359 | 1 | $C_I$ | 1630.23 | 94.38 |

|        |   |       |         |       |        |   |       |         |       |
|--------|---|-------|---------|-------|--------|---|-------|---------|-------|
| 236704 | 2 | $C_I$ | 1612.73 | 76.88 | 213244 | 2 | $C_I$ | 1630.25 | 94.39 |
| 278579 | 1 | $C_I$ | 1612.74 | 76.89 | 212798 | 2 | $C_I$ | 1630.25 | 94.39 |
| 242976 | 1 | $C_I$ | 1612.75 | 76.89 | 251453 | 1 | $C_I$ | 1630.26 | 94.41 |
| 266040 | 1 | $C_I$ | 1612.75 | 76.90 | 214279 | 1 | $C_I$ | 1630.26 | 94.41 |
| 211189 | 1 | $C_I$ | 1612.76 | 76.90 | 280116 | 2 | $C_I$ | 1630.26 | 94.41 |
| 284810 | 1 | $C_I$ | 1612.76 | 76.90 | 239406 | 1 | $C_I$ | 1630.27 | 94.41 |
| 207047 | 1 | $C_I$ | 1612.76 | 76.91 | 265785 | 2 | $C_I$ | 1630.27 | 94.41 |
| 285151 | 1 | $C_I$ | 1612.77 | 76.91 | 268060 | 2 | $C_I$ | 1630.27 | 94.41 |
| 285852 | 0 | $C_I$ | 1612.78 | 76.93 | 283043 | 2 | $C_I$ | 1630.27 | 94.42 |
| 265671 | 2 | $C_I$ | 1612.79 | 76.93 | 212214 | 2 | $C_I$ | 1630.27 | 94.42 |
| 203515 | 2 | $C_I$ | 1612.81 | 76.96 | 256073 | 2 | $C_I$ | 1630.28 | 94.43 |
| 212120 | 2 | $C_I$ | 1612.83 | 76.97 | 280810 | 2 | $C_I$ | 1630.29 | 94.43 |
| 214862 | 1 | $C_I$ | 1612.85 | 77.00 | 172015 | 2 | $C_I$ | 1630.30 | 94.45 |
| 265730 | 2 | $C_I$ | 1612.88 | 77.02 | 277705 | 2 | $C_I$ | 1630.30 | 94.45 |
| 262447 | 1 | $C_I$ | 1612.89 | 77.03 | 283205 | 2 | $C_I$ | 1630.30 | 94.45 |
| 251788 | 2 | $C_I$ | 1612.92 | 77.07 | 272382 | 1 | $C_I$ | 1630.31 | 94.46 |
| 276939 | 1 | $C_I$ | 1612.94 | 77.08 | 214983 | 1 | $C_I$ | 1630.31 | 94.46 |
| 268464 | 1 | $C_I$ | 1612.95 | 77.09 | 265299 | 2 | $C_I$ | 1630.32 | 94.47 |
| 205627 | 1 | $C_I$ | 1612.95 | 77.10 | 265741 | 2 | $C_I$ | 1630.32 | 94.47 |
| 282261 | 2 | $C_I$ | 1612.99 | 77.13 | 269077 | 2 | $C_I$ | 1630.33 | 94.47 |
| 276357 | 1 | $C_I$ | 1612.99 | 77.14 | 278939 | 2 | $C_I$ | 1630.33 | 94.47 |
| 203699 | 2 | $C_I$ | 1613.01 | 77.16 | 236007 | 2 | $C_I$ | 1630.33 | 94.48 |

|        |   |       |         |       |        |   |       |         |       |
|--------|---|-------|---------|-------|--------|---|-------|---------|-------|
| 285256 | 1 | $C_I$ | 1613.03 | 77.17 | 284713 | 1 | $C_I$ | 1630.33 | 94.48 |
| 284711 | 1 | $C_I$ | 1613.03 | 77.17 | 265432 | 2 | $C_I$ | 1630.33 | 94.48 |
| 284459 | 1 | $C_I$ | 1613.06 | 77.20 | 285410 | 1 | $C_I$ | 1630.34 | 94.48 |
| 282806 | 1 | $C_I$ | 1613.09 | 77.24 | 277699 | 1 | $C_I$ | 1630.34 | 94.49 |
| 214136 | 1 | $C_I$ | 1613.14 | 77.28 | 282667 | 2 | $C_I$ | 1630.35 | 94.49 |
| 285571 | 0 | $C_I$ | 1613.16 | 77.30 | 281351 | 1 | $C_I$ | 1630.35 | 94.49 |
| 283596 | 2 | $C_I$ | 1613.16 | 77.31 | 266576 | 1 | $C_I$ | 1630.36 | 94.50 |
| 276130 | 2 | $C_I$ | 1613.18 | 77.33 | 282530 | 2 | $C_I$ | 1630.36 | 94.50 |
| 265988 | 1 | $C_I$ | 1613.24 | 77.39 | 251538 | 2 | $C_I$ | 1630.36 | 94.51 |
| 285384 | 1 | $C_2$ | 1613.25 | 77.39 | 215120 | 1 | $C_I$ | 1630.36 | 94.51 |
| 276353 | 2 | $C_I$ | 1613.25 | 77.39 | 283277 | 2 | $C_I$ | 1630.37 | 94.52 |
| 285478 | 0 | $C_S$ | 1613.25 | 77.40 | 262496 | 1 | $C_I$ | 1630.37 | 94.52 |
| 282372 | 1 | $C_I$ | 1613.28 | 77.42 | 213704 | 2 | $C_I$ | 1630.37 | 94.52 |
| 270824 | 1 | $C_I$ | 1613.32 | 77.46 | 268535 | 2 | $C_I$ | 1630.38 | 94.52 |
| 251164 | 1 | $C_I$ | 1613.35 | 77.50 | 254299 | 2 | $C_I$ | 1630.38 | 94.52 |
| 283434 | 1 | $C_I$ | 1613.39 | 77.53 | 278693 | 2 | $C_I$ | 1630.38 | 94.53 |
| 285528 | 0 | $C_I$ | 1613.39 | 77.54 | 235166 | 2 | $C_I$ | 1630.38 | 94.53 |
| 284854 | 1 | $C_I$ | 1613.40 | 77.54 | 277274 | 2 | $C_I$ | 1630.39 | 94.53 |
| 227581 | 1 | $C_I$ | 1613.40 | 77.54 | 214071 | 2 | $C_I$ | 1630.39 | 94.54 |
| 285374 | 1 | $C_I$ | 1613.40 | 77.55 | 284980 | 1 | $C_I$ | 1630.39 | 94.54 |
| 214988 | 1 | $C_I$ | 1613.40 | 77.55 | 273944 | 1 | $C_I$ | 1630.40 | 94.54 |
| 265859 | 1 | $C_I$ | 1613.42 | 77.57 | 266185 | 2 | $C_I$ | 1630.40 | 94.55 |



|        |   |       |         |       |        |   |       |         |       |
|--------|---|-------|---------|-------|--------|---|-------|---------|-------|
| 282415 | 1 | $C_1$ | 1613.44 | 77.59 | 240208 | 2 | $C_1$ | 1630.41 | 94.55 |
| 265824 | 2 | $C_1$ | 1613.50 | 77.64 | 265687 | 2 | $C_1$ | 1630.41 | 94.56 |
| 284759 | 1 | $C_1$ | 1613.51 | 77.65 | 281428 | 1 | $C_1$ | 1630.41 | 94.56 |
| 282861 | 1 | $C_1$ | 1613.53 | 77.68 | 248100 | 2 | $C_1$ | 1630.42 | 94.57 |
| 282641 | 2 | $C_1$ | 1613.53 | 77.68 | 226745 | 1 | $C_1$ | 1630.42 | 94.57 |
| 285908 | 0 | $D_2$ | 1613.54 | 77.68 | 265724 | 2 | $C_1$ | 1630.43 | 94.57 |
| 281703 | 1 | $C_1$ | 1613.56 | 77.71 | 270517 | 2 | $C_1$ | 1630.43 | 94.58 |
| 263161 | 1 | $C_1$ | 1613.56 | 77.71 | 232065 | 2 | $C_1$ | 1630.44 | 94.59 |
| 285690 | 0 | $C_1$ | 1613.58 | 77.72 | 265554 | 2 | $C_1$ | 1630.44 | 94.59 |
| 285070 | 1 | $C_1$ | 1613.59 | 77.73 | 179558 | 2 | $C_1$ | 1630.45 | 94.59 |
| 280094 | 1 | $C_1$ | 1613.60 | 77.75 | 285648 | 0 | $C_1$ | 1630.45 | 94.59 |
| 282183 | 1 | $C_1$ | 1613.61 | 77.75 | 239952 | 2 | $C_1$ | 1630.45 | 94.59 |
| 282083 | 1 | $C_1$ | 1613.62 | 77.76 | 213094 | 2 | $C_1$ | 1630.45 | 94.60 |
| 285490 | 0 | $C_1$ | 1613.62 | 77.76 | 284486 | 1 | $C_1$ | 1630.46 | 94.60 |
| 268721 | 1 | $C_1$ | 1613.62 | 77.77 | 265481 | 2 | $C_1$ | 1630.46 | 94.60 |
| 256883 | 1 | $C_1$ | 1613.64 | 77.78 | 212377 | 2 | $C_1$ | 1630.47 | 94.61 |
| 284846 | 1 | $C_1$ | 1613.64 | 77.79 | 276086 | 2 | $C_1$ | 1630.47 | 94.62 |
| 214192 | 1 | $C_1$ | 1613.68 | 77.83 | 285390 | 1 | $C_1$ | 1630.48 | 94.62 |
| 159644 | 2 | $C_1$ | 1613.72 | 77.87 | 285622 | 0 | $C_2$ | 1630.48 | 94.62 |
| 278934 | 1 | $C_1$ | 1613.73 | 77.87 | 274068 | 2 | $C_1$ | 1630.48 | 94.62 |
| 285760 | 0 | $C_1$ | 1613.78 | 77.92 | 214847 | 1 | $C_1$ | 1630.49 | 94.64 |
| 282937 | 2 | $C_1$ | 1613.80 | 77.94 | 282820 | 2 | $C_1$ | 1630.49 | 94.64 |

|        |   |       |         |       |        |   |       |         |       |
|--------|---|-------|---------|-------|--------|---|-------|---------|-------|
| 277091 | 2 | $C_1$ | 1613.82 | 77.96 | 284294 | 1 | $C_1$ | 1630.49 | 94.64 |
| 283918 | 1 | $C_1$ | 1613.84 | 77.98 | 205606 | 1 | $C_1$ | 1630.50 | 94.64 |
| 223406 | 1 | $C_1$ | 1613.84 | 77.98 | 212360 | 2 | $C_1$ | 1630.50 | 94.64 |
| 285530 | 0 | $D_2$ | 1613.84 | 77.99 | 213918 | 1 | $C_1$ | 1630.50 | 94.65 |
| 285586 | 0 | $C_1$ | 1613.87 | 78.01 | 205641 | 1 | $C_1$ | 1630.50 | 94.65 |
| 266065 | 1 | $C_1$ | 1613.87 | 78.02 | 236784 | 2 | $C_1$ | 1630.50 | 94.65 |
| 285611 | 0 | $C_1$ | 1613.89 | 78.03 | 282755 | 2 | $C_1$ | 1630.50 | 94.65 |
| 282023 | 1 | $C_1$ | 1613.89 | 78.04 | 265934 | 2 | $C_1$ | 1630.51 | 94.65 |
| 269373 | 2 | $C_1$ | 1613.90 | 78.04 | 267018 | 2 | $C_1$ | 1630.51 | 94.65 |
| 274827 | 2 | $C_1$ | 1613.91 | 78.05 | 276232 | 2 | $C_1$ | 1630.51 | 94.66 |
| 226572 | 1 | $C_1$ | 1613.94 | 78.08 | 212935 | 2 | $C_1$ | 1630.51 | 94.66 |
| 214141 | 1 | $C_1$ | 1613.94 | 78.09 | 229573 | 2 | $C_1$ | 1630.52 | 94.66 |
| 267181 | 1 | $C_1$ | 1613.96 | 78.11 | 206362 | 1 | $C_1$ | 1630.52 | 94.66 |
| 285497 | 0 | $C_2$ | 1613.97 | 78.12 | 255794 | 2 | $C_1$ | 1630.52 | 94.67 |
| 282816 | 1 | $C_1$ | 1613.98 | 78.13 | 279292 | 2 | $C_1$ | 1630.53 | 94.67 |
| 269043 | 2 | $C_1$ | 1614.04 | 78.19 | 227449 | 2 | $C_1$ | 1630.53 | 94.67 |
| 284663 | 1 | $C_1$ | 1614.05 | 78.19 | 271215 | 2 | $C_1$ | 1630.53 | 94.68 |
| 205594 | 1 | $C_1$ | 1614.06 | 78.21 | 212440 | 2 | $C_1$ | 1630.54 | 94.68 |
| 280185 | 1 | $C_1$ | 1614.07 | 78.22 | 281555 | 1 | $C_1$ | 1630.56 | 94.70 |
| 253705 | 1 | $C_1$ | 1614.09 | 78.24 | 255791 | 2 | $C_1$ | 1630.57 | 94.71 |
| 274716 | 1 | $C_1$ | 1614.10 | 78.24 | 269457 | 1 | $C_1$ | 1630.57 | 94.72 |
| 283060 | 2 | $C_1$ | 1614.10 | 78.25 | 282420 | 2 | $C_1$ | 1630.57 | 94.72 |

|        |   |       |         |       |        |   |       |         |       |
|--------|---|-------|---------|-------|--------|---|-------|---------|-------|
| 214303 | 1 | $C_I$ | 1614.12 | 78.27 | 246382 | 2 | $C_I$ | 1630.58 | 94.73 |
| 284818 | 1 | $C_I$ | 1614.13 | 78.28 | 285549 | 0 | $C_I$ | 1630.58 | 94.73 |
| 284947 | 1 | $C_I$ | 1614.14 | 78.28 | 213666 | 1 | $C_I$ | 1630.59 | 94.73 |
| 268495 | 2 | $C_I$ | 1614.14 | 78.28 | 270955 | 2 | $C_I$ | 1630.59 | 94.74 |
| 283398 | 1 | $C_I$ | 1614.15 | 78.30 | 275325 | 1 | $C_I$ | 1630.59 | 94.74 |
| 282928 | 2 | $C_I$ | 1614.15 | 78.30 | 278368 | 1 | $C_I$ | 1630.60 | 94.74 |
| 269050 | 2 | $C_I$ | 1614.17 | 78.32 | 281447 | 1 | $C_I$ | 1630.60 | 94.74 |
| 213563 | 1 | $C_I$ | 1614.19 | 78.33 | 247247 | 2 | $C_I$ | 1630.61 | 94.75 |
| 275212 | 1 | $C_I$ | 1614.20 | 78.35 | 269053 | 1 | $C_I$ | 1630.61 | 94.75 |
| 284371 | 1 | $C_I$ | 1614.23 | 78.37 | 254898 | 2 | $C_I$ | 1630.61 | 94.76 |
| 273386 | 1 | $C_I$ | 1614.25 | 78.40 | 170934 | 2 | $C_I$ | 1630.61 | 94.76 |
| 251539 | 1 | $C_I$ | 1614.26 | 78.41 | 256662 | 2 | $C_I$ | 1630.62 | 94.76 |
| 218985 | 1 | $C_S$ | 1614.30 | 78.45 | 226757 | 1 | $C_I$ | 1630.63 | 94.77 |
| 282807 | 2 | $C_I$ | 1614.32 | 78.47 | 281096 | 2 | $C_I$ | 1630.63 | 94.77 |
| 285700 | 0 | $C_I$ | 1614.35 | 78.50 | 277884 | 1 | $C_I$ | 1630.63 | 94.78 |
| 285873 | 0 | $C_I$ | 1614.38 | 78.52 | 282373 | 1 | $C_I$ | 1630.64 | 94.78 |
| 285885 | 0 | $C_2$ | 1614.39 | 78.53 | 179975 | 2 | $C_I$ | 1630.64 | 94.79 |
| 265709 | 2 | $C_I$ | 1614.40 | 78.55 | 254031 | 1 | $C_I$ | 1630.65 | 94.79 |
| 270992 | 1 | $C_I$ | 1614.41 | 78.56 | 282808 | 2 | $C_I$ | 1630.65 | 94.79 |
| 276114 | 2 | $C_I$ | 1614.41 | 78.56 | 213950 | 1 | $C_I$ | 1630.65 | 94.79 |
| 213789 | 1 | $C_I$ | 1614.42 | 78.57 | 213633 | 2 | $C_I$ | 1630.65 | 94.80 |
| 276381 | 1 | $C_I$ | 1614.44 | 78.58 | 227689 | 1 | $C_I$ | 1630.66 | 94.80 |

|        |   |       |         |       |        |   |       |         |       |
|--------|---|-------|---------|-------|--------|---|-------|---------|-------|
| 275960 | 2 | $C_I$ | 1614.45 | 78.60 | 262920 | 1 | $C_I$ | 1630.66 | 94.80 |
| 206358 | 1 | $C_I$ | 1614.45 | 78.60 | 236208 | 2 | $C_I$ | 1630.66 | 94.81 |
| 285564 | 0 | $C_I$ | 1614.46 | 78.61 | 236338 | 2 | $C_I$ | 1630.66 | 94.81 |
| 215777 | 1 | $C_I$ | 1614.46 | 78.61 | 255770 | 1 | $C_I$ | 1630.66 | 94.81 |
| 281625 | 1 | $C_I$ | 1614.47 | 78.62 | 278868 | 1 | $C_I$ | 1630.67 | 94.82 |
| 226792 | 1 | $C_I$ | 1614.49 | 78.63 | 277241 | 2 | $C_I$ | 1630.67 | 94.82 |
| 283470 | 1 | $C_I$ | 1614.50 | 78.65 | 282381 | 2 | $C_I$ | 1630.68 | 94.82 |
| 280066 | 1 | $C_I$ | 1614.52 | 78.66 | 285215 | 1 | $C_I$ | 1630.68 | 94.82 |
| 215616 | 1 | $C_I$ | 1614.52 | 78.67 | 266591 | 2 | $C_I$ | 1630.68 | 94.82 |
| 282191 | 1 | $C_I$ | 1614.52 | 78.67 | 187861 | 2 | $C_I$ | 1630.68 | 94.82 |
| 285371 | 1 | $C_I$ | 1614.53 | 78.68 | 203407 | 2 | $C_I$ | 1630.68 | 94.83 |
| 266013 | 2 | $C_I$ | 1614.55 | 78.69 | 282832 | 2 | $C_I$ | 1630.68 | 94.83 |
| 264422 | 1 | $C_I$ | 1614.59 | 78.73 | 251056 | 2 | $C_I$ | 1630.68 | 94.83 |
| 265753 | 1 | $C_I$ | 1614.65 | 78.79 | 205636 | 2 | $C_I$ | 1630.70 | 94.84 |
| 237570 | 1 | $C_I$ | 1614.65 | 78.80 | 262584 | 1 | $C_I$ | 1630.70 | 94.84 |
| 282593 | 1 | $C_I$ | 1614.65 | 78.80 | 285148 | 2 | $C_I$ | 1630.70 | 94.85 |
| 282168 | 1 | $C_I$ | 1614.66 | 78.81 | 269834 | 2 | $C_I$ | 1630.71 | 94.85 |
| 284764 | 1 | $C_I$ | 1614.68 | 78.82 | 275122 | 1 | $C_I$ | 1630.71 | 94.85 |
| 285790 | 0 | $C_I$ | 1614.69 | 78.83 | 203232 | 2 | $C_I$ | 1630.71 | 94.85 |
| 269758 | 1 | $C_I$ | 1614.69 | 78.83 | 270752 | 2 | $C_I$ | 1630.72 | 94.86 |
| 214984 | 1 | $C_I$ | 1614.70 | 78.84 | 269828 | 2 | $C_I$ | 1630.73 | 94.87 |
| 285603 | 0 | $C_I$ | 1614.71 | 78.85 | 227590 | 2 | $C_I$ | 1630.74 | 94.89 |

|        |   |       |         |       |        |   |       |         |       |
|--------|---|-------|---------|-------|--------|---|-------|---------|-------|
| 273389 | 1 | $C_I$ | 1614.73 | 78.87 | 243215 | 2 | $C_I$ | 1630.74 | 94.89 |
| 284844 | 1 | $C_I$ | 1614.75 | 78.89 | 237444 | 2 | $C_I$ | 1630.75 | 94.89 |
| 268434 | 2 | $C_I$ | 1614.78 | 78.93 | 282531 | 2 | $C_I$ | 1630.75 | 94.90 |
| 273388 | 1 | $C_I$ | 1614.79 | 78.93 | 213643 | 1 | $C_I$ | 1630.76 | 94.90 |
| 283169 | 2 | $C_I$ | 1614.80 | 78.95 | 207258 | 2 | $C_I$ | 1630.76 | 94.90 |
| 285598 | 0 | $C_I$ | 1614.82 | 78.96 | 275549 | 2 | $C_I$ | 1630.76 | 94.91 |
| 282442 | 1 | $C_I$ | 1614.83 | 78.97 | 252729 | 2 | $C_I$ | 1630.77 | 94.92 |
| 285544 | 0 | $C_I$ | 1614.83 | 78.97 | 282516 | 2 | $C_I$ | 1630.77 | 94.92 |
| 281427 | 1 | $C_I$ | 1614.85 | 78.99 | 272660 | 1 | $C_I$ | 1630.77 | 94.92 |
| 205344 | 1 | $C_I$ | 1614.85 | 79.00 | 248334 | 1 | $C_I$ | 1630.79 | 94.93 |
| 285562 | 0 | $C_2$ | 1614.85 | 79.00 | 284529 | 1 | $C_I$ | 1630.79 | 94.94 |
| 270823 | 1 | $C_I$ | 1614.86 | 79.00 | 283682 | 2 | $C_I$ | 1630.79 | 94.94 |
| 275083 | 2 | $C_I$ | 1614.87 | 79.01 | 285596 | 0 | $C_I$ | 1630.80 | 94.94 |
| 285672 | 0 | $C_s$ | 1614.88 | 79.03 | 285535 | 0 | $C_I$ | 1630.80 | 94.95 |
| 278568 | 2 | $C_I$ | 1614.89 | 79.04 | 268379 | 2 | $C_I$ | 1630.81 | 94.95 |
| 283042 | 2 | $C_I$ | 1614.91 | 79.05 | 239874 | 1 | $C_I$ | 1630.81 | 94.95 |
| 277659 | 1 | $C_I$ | 1614.92 | 79.06 | 251034 | 2 | $C_I$ | 1630.81 | 94.96 |
| 277715 | 1 | $C_I$ | 1614.92 | 79.07 | 254301 | 2 | $C_I$ | 1630.82 | 94.96 |
| 281561 | 1 | $C_I$ | 1614.93 | 79.07 | 282957 | 2 | $C_I$ | 1630.82 | 94.97 |
| 283005 | 1 | $C_I$ | 1614.93 | 79.08 | 277673 | 2 | $C_I$ | 1630.83 | 94.97 |
| 285573 | 0 | $C_I$ | 1614.99 | 79.13 | 213939 | 2 | $C_I$ | 1630.83 | 94.98 |
| 285836 | 0 | $C_I$ | 1614.99 | 79.14 | 248120 | 1 | $C_I$ | 1630.84 | 94.98 |

|        |   |       |         |       |        |   |       |         |       |
|--------|---|-------|---------|-------|--------|---|-------|---------|-------|
| 281710 | 1 | $C_I$ | 1614.99 | 79.14 | 207226 | 1 | $C_I$ | 1630.84 | 94.99 |
| 283125 | 2 | $C_I$ | 1615.00 | 79.14 | 187603 | 2 | $C_I$ | 1630.84 | 94.99 |
| 282949 | 2 | $C_I$ | 1615.03 | 79.17 | 262512 | 1 | $C_I$ | 1630.85 | 94.99 |
| 213060 | 1 | $C_I$ | 1615.03 | 79.18 | 240431 | 1 | $C_I$ | 1630.86 | 95.01 |
| 252573 | 1 | $C_I$ | 1615.04 | 79.18 | 275473 | 2 | $C_I$ | 1630.87 | 95.01 |
| 203265 | 1 | $C_I$ | 1615.04 | 79.19 | 205590 | 1 | $C_I$ | 1630.87 | 95.02 |
| 251008 | 1 | $C_I$ | 1615.06 | 79.20 | 227539 | 2 | $C_I$ | 1630.88 | 95.02 |
| 203500 | 1 | $C_I$ | 1615.06 | 79.21 | 282150 | 2 | $C_I$ | 1630.88 | 95.02 |
| 235990 | 2 | $C_I$ | 1615.07 | 79.21 | 269226 | 2 | $C_I$ | 1630.88 | 95.02 |
| 281293 | 1 | $C_I$ | 1615.07 | 79.22 | 266299 | 2 | $C_I$ | 1630.88 | 95.02 |
| 214134 | 1 | $C_I$ | 1615.08 | 79.22 | 268445 | 2 | $C_I$ | 1630.88 | 95.03 |
| 285754 | 0 | $C_S$ | 1615.08 | 79.22 | 255768 | 2 | $C_I$ | 1630.89 | 95.03 |
| 285909 | 0 | $C_2$ | 1615.08 | 79.23 | 240887 | 1 | $C_I$ | 1630.89 | 95.04 |
| 281358 | 1 | $C_I$ | 1615.10 | 79.24 | 275119 | 2 | $C_I$ | 1630.89 | 95.04 |
| 213948 | 1 | $C_I$ | 1615.11 | 79.26 | 214103 | 1 | $C_I$ | 1630.90 | 95.04 |
| 282959 | 2 | $C_I$ | 1615.13 | 79.27 | 194293 | 2 | $C_I$ | 1630.90 | 95.04 |
| 285783 | 0 | $C_I$ | 1615.15 | 79.30 | 270412 | 2 | $C_I$ | 1630.90 | 95.04 |
| 276924 | 1 | $C_I$ | 1615.16 | 79.30 | 213976 | 2 | $C_I$ | 1630.90 | 95.05 |
| 285002 | 1 | $C_I$ | 1615.16 | 79.31 | 256838 | 1 | $C_I$ | 1630.91 | 95.05 |
| 214122 | 1 | $C_I$ | 1615.17 | 79.32 | 263115 | 2 | $C_I$ | 1630.91 | 95.05 |
| 277696 | 1 | $C_I$ | 1615.17 | 79.32 | 278653 | 2 | $C_I$ | 1630.91 | 95.06 |
| 263138 | 1 | $C_I$ | 1615.19 | 79.33 | 285759 | 0 | $C_I$ | 1630.91 | 95.06 |

|        |   |       |         |       |        |   |       |         |       |
|--------|---|-------|---------|-------|--------|---|-------|---------|-------|
| 203281 | 1 | $C_1$ | 1615.19 | 79.34 | 207685 | 2 | $C_1$ | 1630.92 | 95.07 |
| 251728 | 2 | $C_1$ | 1615.19 | 79.34 | 247236 | 2 | $C_1$ | 1630.92 | 95.07 |
| 285375 | 1 | $C_1$ | 1615.21 | 79.35 | 269750 | 2 | $C_1$ | 1630.93 | 95.07 |
| 215028 | 2 | $C_1$ | 1615.21 | 79.35 | 268572 | 1 | $C_1$ | 1630.93 | 95.07 |
| 284479 | 1 | $C_1$ | 1615.21 | 79.35 | 284362 | 1 | $C_1$ | 1630.93 | 95.08 |
| 265795 | 2 | $C_1$ | 1615.21 | 79.36 | 285443 | 1 | $C_1$ | 1630.94 | 95.08 |
| 235731 | 1 | $C_1$ | 1615.24 | 79.38 | 211608 | 2 | $C_1$ | 1630.94 | 95.09 |
| 213067 | 2 | $C_1$ | 1615.24 | 79.38 | 252522 | 1 | $C_1$ | 1630.95 | 95.09 |
| 285580 | 0 | $C_2$ | 1615.29 | 79.43 | 285474 | 0 | $C_1$ | 1630.95 | 95.09 |
| 274499 | 1 | $C_1$ | 1615.29 | 79.44 | 275981 | 2 | $C_1$ | 1630.96 | 95.10 |
| 283053 | 1 | $C_1$ | 1615.31 | 79.46 | 270984 | 2 | $C_1$ | 1630.96 | 95.10 |
| 252763 | 1 | $C_1$ | 1615.36 | 79.51 | 252510 | 2 | $C_1$ | 1630.96 | 95.11 |
| 285762 | 0 | $C_1$ | 1615.39 | 79.53 | 258847 | 2 | $C_1$ | 1630.96 | 95.11 |
| 283188 | 1 | $C_1$ | 1615.40 | 79.55 | 269356 | 1 | $C_1$ | 1630.96 | 95.11 |
| 214861 | 1 | $C_1$ | 1615.41 | 79.55 | 273911 | 1 | $C_1$ | 1630.97 | 95.11 |
| 285248 | 2 | $C_1$ | 1615.43 | 79.57 | 285541 | 0 | $C_1$ | 1630.97 | 95.11 |
| 282069 | 1 | $C_1$ | 1615.44 | 79.58 | 283677 | 1 | $C_1$ | 1630.97 | 95.12 |
| 276056 | 2 | $C_1$ | 1615.45 | 79.60 | 212842 | 2 | $C_1$ | 1630.98 | 95.13 |
| 205268 | 1 | $C_1$ | 1615.45 | 79.60 | 248216 | 1 | $C_1$ | 1631.00 | 95.14 |
| 265808 | 2 | $C_1$ | 1615.46 | 79.61 | 278541 | 1 | $C_1$ | 1631.00 | 95.15 |
| 269189 | 2 | $C_1$ | 1615.52 | 79.67 | 278933 | 1 | $C_1$ | 1631.01 | 95.16 |
| 285202 | 2 | $C_1$ | 1615.53 | 79.67 | 207373 | 2 | $C_1$ | 1631.01 | 95.16 |

|        |   |       |         |       |        |   |       |         |       |
|--------|---|-------|---------|-------|--------|---|-------|---------|-------|
| 249970 | 1 | $C_1$ | 1615.53 | 79.68 | 236030 | 2 | $C_1$ | 1631.02 | 95.16 |
| 277262 | 1 | $C_1$ | 1615.54 | 79.68 | 180256 | 2 | $C_1$ | 1631.02 | 95.17 |
| 284860 | 2 | $C_1$ | 1615.54 | 79.68 | 279656 | 1 | $C_1$ | 1631.02 | 95.17 |
| 278694 | 1 | $C_1$ | 1615.56 | 79.71 | 275967 | 1 | $C_1$ | 1631.02 | 95.17 |
| 252615 | 2 | $C_1$ | 1615.57 | 79.71 | 262921 | 1 | $C_1$ | 1631.02 | 95.17 |
| 274723 | 1 | $C_1$ | 1615.58 | 79.72 | 280087 | 2 | $C_1$ | 1631.02 | 95.17 |
| 252799 | 2 | $C_1$ | 1615.58 | 79.73 | 247124 | 2 | $C_1$ | 1631.03 | 95.18 |
| 215004 | 1 | $C_1$ | 1615.61 | 79.76 | 277856 | 2 | $C_1$ | 1631.05 | 95.19 |
| 282534 | 2 | $C_1$ | 1615.62 | 79.76 | 264438 | 2 | $C_1$ | 1631.05 | 95.19 |
| 285164 | 1 | $C_1$ | 1615.64 | 79.78 | 279685 | 1 | $C_1$ | 1631.05 | 95.20 |
| 225477 | 1 | $C_1$ | 1615.64 | 79.78 | 211178 | 1 | $C_1$ | 1631.06 | 95.20 |
| 284327 | 1 | $C_1$ | 1615.64 | 79.79 | 239318 | 1 | $C_1$ | 1631.06 | 95.21 |
| 283007 | 2 | $C_1$ | 1615.68 | 79.82 | 279007 | 1 | $C_1$ | 1631.06 | 95.21 |
| 203243 | 1 | $C_1$ | 1615.68 | 79.83 | 151310 | 2 | $C_1$ | 1631.06 | 95.21 |
| 268460 | 1 | $C_1$ | 1615.68 | 79.83 | 253696 | 1 | $C_1$ | 1631.07 | 95.21 |
| 280054 | 1 | $C_1$ | 1615.72 | 79.86 | 253765 | 1 | $C_1$ | 1631.07 | 95.22 |
| 251069 | 1 | $C_1$ | 1615.73 | 79.87 | 222787 | 1 | $C_1$ | 1631.07 | 95.22 |
| 237185 | 1 | $C_1$ | 1615.73 | 79.88 | 285738 | 0 | $C_1$ | 1631.08 | 95.22 |
| 268517 | 2 | $C_1$ | 1615.73 | 79.88 | 276308 | 2 | $C_1$ | 1631.09 | 95.23 |
| 285359 | 2 | $C_1$ | 1615.75 | 79.89 | 280197 | 1 | $C_1$ | 1631.09 | 95.23 |
| 278644 | 1 | $C_1$ | 1615.78 | 79.92 | 280068 | 1 | $C_1$ | 1631.10 | 95.25 |
| 283098 | 2 | $C_1$ | 1615.81 | 79.95 | 215746 | 2 | $C_1$ | 1631.11 | 95.25 |



|        |   |       |         |       |        |   |       |         |       |
|--------|---|-------|---------|-------|--------|---|-------|---------|-------|
| 276609 | 1 | $C_1$ | 1615.82 | 79.96 | 283680 | 2 | $C_1$ | 1631.11 | 95.26 |
| 284293 | 1 | $C_1$ | 1615.82 | 79.97 | 276497 | 2 | $C_1$ | 1631.12 | 95.26 |
| 268492 | 1 | $C_1$ | 1615.84 | 79.99 | 210842 | 2 | $C_1$ | 1631.12 | 95.27 |
| 270920 | 2 | $C_1$ | 1615.85 | 80.00 | 269298 | 1 | $C_1$ | 1631.12 | 95.27 |
| 265788 | 2 | $C_1$ | 1615.87 | 80.01 | 212034 | 2 | $C_1$ | 1631.12 | 95.27 |
| 277062 | 2 | $C_1$ | 1615.87 | 80.01 | 212972 | 2 | $C_1$ | 1631.14 | 95.28 |
| 285693 | 0 | $C_1$ | 1615.87 | 80.01 | 184847 | 2 | $C_1$ | 1631.14 | 95.28 |
| 267155 | 1 | $C_1$ | 1615.89 | 80.03 | 269617 | 2 | $C_1$ | 1631.14 | 95.29 |
| 239864 | 1 | $C_1$ | 1615.90 | 80.05 | 227668 | 2 | $C_1$ | 1631.15 | 95.29 |
| 212117 | 2 | $C_1$ | 1615.91 | 80.05 | 247703 | 1 | $C_1$ | 1631.15 | 95.30 |
| 232107 | 1 | $C_1$ | 1615.91 | 80.06 | 284752 | 1 | $C_1$ | 1631.15 | 95.30 |
| 282804 | 1 | $C_1$ | 1615.93 | 80.07 | 265559 | 2 | $C_1$ | 1631.17 | 95.31 |
| 214140 | 1 | $C_1$ | 1615.95 | 80.10 | 208335 | 1 | $C_1$ | 1631.18 | 95.32 |
| 284701 | 1 | $C_1$ | 1615.98 | 80.12 | 282262 | 2 | $C_1$ | 1631.18 | 95.32 |
| 285614 | 0 | $C_2$ | 1615.99 | 80.13 | 262515 | 1 | $C_1$ | 1631.18 | 95.33 |
| 280065 | 1 | $C_1$ | 1616.00 | 80.15 | 266034 | 2 | $C_1$ | 1631.18 | 95.33 |
| 213949 | 1 | $C_1$ | 1616.01 | 80.15 | 212088 | 2 | $C_1$ | 1631.19 | 95.33 |
| 282434 | 1 | $C_1$ | 1616.01 | 80.15 | 252794 | 2 | $C_1$ | 1631.19 | 95.34 |
| 227558 | 1 | $C_1$ | 1616.01 | 80.15 | 213954 | 1 | $C_1$ | 1631.20 | 95.34 |
| 218256 | 1 | $C_1$ | 1616.02 | 80.16 | 251392 | 2 | $C_1$ | 1631.20 | 95.34 |
| 252705 | 1 | $C_1$ | 1616.02 | 80.16 | 283889 | 1 | $C_1$ | 1631.20 | 95.34 |
| 250911 | 1 | $C_1$ | 1616.02 | 80.17 | 284344 | 1 | $C_1$ | 1631.20 | 95.35 |

|        |   |       |         |       |        |   |       |         |       |
|--------|---|-------|---------|-------|--------|---|-------|---------|-------|
| 279053 | 1 | $C_I$ | 1616.04 | 80.18 | 278879 | 1 | $C_I$ | 1631.20 | 95.35 |
| 203256 | 1 | $C_I$ | 1616.04 | 80.19 | 255677 | 2 | $C_I$ | 1631.21 | 95.36 |
| 278870 | 1 | $C_I$ | 1616.06 | 80.21 | 278863 | 2 | $C_I$ | 1631.22 | 95.37 |
| 285154 | 2 | $C_I$ | 1616.06 | 80.21 | 274439 | 1 | $C_I$ | 1631.24 | 95.39 |
| 283436 | 1 | $C_I$ | 1616.07 | 80.21 | 282945 | 1 | $C_I$ | 1631.25 | 95.39 |
| 282447 | 1 | $C_I$ | 1616.07 | 80.21 | 237569 | 1 | $C_I$ | 1631.26 | 95.41 |
| 285404 | 1 | $C_S$ | 1616.07 | 80.22 | 275120 | 2 | $C_I$ | 1631.27 | 95.42 |
| 269772 | 1 | $C_I$ | 1616.08 | 80.23 | 270819 | 2 | $C_I$ | 1631.27 | 95.42 |
| 273394 | 1 | $C_I$ | 1616.09 | 80.23 | 280589 | 1 | $C_I$ | 1631.28 | 95.43 |
| 213085 | 1 | $C_I$ | 1616.10 | 80.25 | 226310 | 2 | $C_I$ | 1631.29 | 95.43 |
| 214053 | 1 | $C_I$ | 1616.10 | 80.25 | 248425 | 2 | $C_I$ | 1631.31 | 95.45 |
| 281330 | 1 | $C_I$ | 1616.12 | 80.27 | 268491 | 2 | $C_I$ | 1631.31 | 95.45 |
| 251168 | 2 | $C_I$ | 1616.16 | 80.31 | 197278 | 2 | $C_I$ | 1631.31 | 95.46 |
| 243208 | 1 | $C_I$ | 1616.19 | 80.33 | 227683 | 1 | $C_I$ | 1631.31 | 95.46 |
| 234803 | 1 | $C_I$ | 1616.20 | 80.34 | 212897 | 1 | $C_I$ | 1631.33 | 95.47 |
| 280071 | 1 | $C_I$ | 1616.20 | 80.35 | 247264 | 2 | $C_I$ | 1631.33 | 95.47 |
| 285349 | 2 | $C_I$ | 1616.20 | 80.35 | 213313 | 2 | $C_I$ | 1631.33 | 95.47 |
| 252695 | 1 | $C_I$ | 1616.21 | 80.36 | 269974 | 2 | $C_I$ | 1631.33 | 95.48 |
| 273426 | 1 | $C_I$ | 1616.22 | 80.36 | 275664 | 1 | $C_I$ | 1631.34 | 95.48 |
| 279086 | 1 | $C_I$ | 1616.22 | 80.36 | 272466 | 1 | $C_I$ | 1631.35 | 95.49 |
| 282685 | 2 | $C_I$ | 1616.23 | 80.38 | 282941 | 2 | $C_I$ | 1631.35 | 95.50 |
| 277225 | 2 | $C_I$ | 1616.23 | 80.38 | 236635 | 2 | $C_I$ | 1631.37 | 95.51 |

|        |   |       |         |       |        |   |       |         |       |
|--------|---|-------|---------|-------|--------|---|-------|---------|-------|
| 285829 | 0 | $C_1$ | 1616.27 | 80.42 | 225375 | 1 | $C_1$ | 1631.37 | 95.51 |
| 236221 | 2 | $C_1$ | 1616.30 | 80.44 | 280464 | 2 | $C_1$ | 1631.37 | 95.52 |
| 281075 | 1 | $C_1$ | 1616.32 | 80.47 | 278504 | 2 | $C_1$ | 1631.38 | 95.52 |
| 236038 | 2 | $C_1$ | 1616.33 | 80.48 | 240170 | 2 | $C_1$ | 1631.38 | 95.52 |
| 214180 | 1 | $C_1$ | 1616.34 | 80.48 | 244071 | 2 | $C_1$ | 1631.38 | 95.53 |
| 285160 | 1 | $C_1$ | 1616.35 | 80.50 | 284999 | 1 | $C_1$ | 1631.38 | 95.53 |
| 214209 | 1 | $C_1$ | 1616.35 | 80.50 | 282562 | 2 | $C_1$ | 1631.39 | 95.53 |
| 188751 | 2 | $C_1$ | 1616.36 | 80.51 | 270191 | 2 | $C_1$ | 1631.39 | 95.54 |
| 235743 | 1 | $C_1$ | 1616.37 | 80.51 | 284011 | 1 | $C_1$ | 1631.41 | 95.55 |
| 285898 | 0 | $C_2$ | 1616.37 | 80.51 | 278995 | 2 | $C_1$ | 1631.43 | 95.57 |
| 256881 | 1 | $C_1$ | 1616.37 | 80.52 | 227422 | 2 | $C_1$ | 1631.43 | 95.58 |
| 276248 | 2 | $C_1$ | 1616.39 | 80.53 | 229568 | 2 | $C_1$ | 1631.44 | 95.58 |
| 278989 | 1 | $C_1$ | 1616.39 | 80.54 | 214981 | 2 | $C_1$ | 1631.45 | 95.59 |
| 212108 | 2 | $C_1$ | 1616.40 | 80.54 | 282232 | 1 | $C_1$ | 1631.45 | 95.60 |
| 281320 | 1 | $C_1$ | 1616.40 | 80.55 | 254237 | 2 | $C_1$ | 1631.46 | 95.60 |
| 280766 | 1 | $C_1$ | 1616.43 | 80.57 | 278779 | 1 | $C_1$ | 1631.46 | 95.61 |
| 285090 | 1 | $C_1$ | 1616.44 | 80.59 | 276210 | 2 | $C_1$ | 1631.46 | 95.61 |
| 276048 | 2 | $C_1$ | 1616.45 | 80.59 | 282037 | 2 | $C_1$ | 1631.46 | 95.61 |
| 239343 | 1 | $C_1$ | 1616.47 | 80.61 | 284350 | 2 | $C_1$ | 1631.47 | 95.61 |
| 265732 | 2 | $C_1$ | 1616.47 | 80.61 | 269245 | 1 | $C_1$ | 1631.48 | 95.62 |
| 207208 | 2 | $C_1$ | 1616.50 | 80.65 | 280713 | 2 | $C_1$ | 1631.48 | 95.63 |
| 284357 | 1 | $C_1$ | 1616.51 | 80.66 | 213940 | 2 | $C_1$ | 1631.48 | 95.63 |

|        |   |       |         |       |        |   |       |         |       |
|--------|---|-------|---------|-------|--------|---|-------|---------|-------|
| 266196 | 2 | $C_I$ | 1616.52 | 80.67 | 243781 | 1 | $C_2$ | 1631.48 | 95.63 |
| 284933 | 2 | $C_I$ | 1616.53 | 80.68 | 244476 | 1 | $C_I$ | 1631.49 | 95.63 |
| 216464 | 2 | $C_I$ | 1616.54 | 80.69 | 283176 | 2 | $C_I$ | 1631.49 | 95.64 |
| 282537 | 2 | $C_I$ | 1616.56 | 80.70 | 205132 | 1 | $C_I$ | 1631.50 | 95.65 |
| 246515 | 1 | $C_I$ | 1616.57 | 80.71 | 278486 | 2 | $C_I$ | 1631.52 | 95.66 |
| 237452 | 1 | $C_I$ | 1616.58 | 80.73 | 265608 | 2 | $C_I$ | 1631.53 | 95.67 |
| 246367 | 1 | $C_I$ | 1616.60 | 80.74 | 268498 | 2 | $C_I$ | 1631.53 | 95.67 |
| 236281 | 2 | $C_I$ | 1616.61 | 80.76 | 266583 | 2 | $C_I$ | 1631.53 | 95.67 |
| 276104 | 1 | $C_I$ | 1616.62 | 80.76 | 212143 | 2 | $C_I$ | 1631.53 | 95.68 |
| 283206 | 1 | $C_I$ | 1616.63 | 80.77 | 284385 | 1 | $C_I$ | 1631.55 | 95.69 |
| 277060 | 1 | $C_I$ | 1616.63 | 80.78 | 203677 | 2 | $C_I$ | 1631.56 | 95.70 |
| 282538 | 2 | $C_I$ | 1616.65 | 80.79 | 262494 | 1 | $C_I$ | 1631.56 | 95.70 |
| 284283 | 1 | $C_I$ | 1616.65 | 80.80 | 213562 | 2 | $C_I$ | 1631.56 | 95.71 |
| 284923 | 1 | $C_S$ | 1616.66 | 80.80 | 210865 | 2 | $C_I$ | 1631.56 | 95.71 |
| 263582 | 1 | $C_I$ | 1616.67 | 80.81 | 252773 | 2 | $C_I$ | 1631.57 | 95.71 |
| 285828 | 0 | $C_I$ | 1616.68 | 80.82 | 269058 | 2 | $C_I$ | 1631.57 | 95.71 |
| 253784 | 1 | $C_I$ | 1616.68 | 80.82 | 254940 | 2 | $C_I$ | 1631.58 | 95.72 |
| 284861 | 1 | $C_I$ | 1616.69 | 80.83 | 268757 | 1 | $C_I$ | 1631.58 | 95.73 |
| 252814 | 2 | $C_I$ | 1616.69 | 80.84 | 275194 | 2 | $C_I$ | 1631.59 | 95.74 |
| 203659 | 1 | $C_I$ | 1616.69 | 80.84 | 284520 | 1 | $C_I$ | 1631.59 | 95.74 |
| 266151 | 2 | $C_I$ | 1616.70 | 80.84 | 277067 | 1 | $C_I$ | 1631.60 | 95.74 |
| 283215 | 2 | $C_I$ | 1616.70 | 80.85 | 284632 | 1 | $C_I$ | 1631.60 | 95.74 |

|        |   |       |         |       |        |   |       |         |       |
|--------|---|-------|---------|-------|--------|---|-------|---------|-------|
| 270111 | 2 | $C_I$ | 1616.74 | 80.89 | 265997 | 2 | $C_I$ | 1631.60 | 95.75 |
| 231193 | 1 | $C_I$ | 1616.75 | 80.89 | 222895 | 2 | $C_I$ | 1631.60 | 95.75 |
| 276136 | 2 | $C_I$ | 1616.75 | 80.89 | 269144 | 1 | $C_I$ | 1631.61 | 95.75 |
| 269406 | 2 | $C_I$ | 1616.80 | 80.94 | 284893 | 1 | $C_I$ | 1631.61 | 95.76 |
| 275687 | 1 | $C_I$ | 1616.82 | 80.97 | 256589 | 1 | $C_I$ | 1631.61 | 95.76 |
| 285383 | 1 | $C_I$ | 1616.83 | 80.97 | 236200 | 2 | $C_I$ | 1631.62 | 95.76 |
| 236489 | 2 | $C_I$ | 1616.86 | 81.00 | 224575 | 2 | $C_I$ | 1631.62 | 95.77 |
| 278735 | 1 | $C_I$ | 1616.87 | 81.01 | 284920 | 1 | $C_s$ | 1631.63 | 95.77 |
| 210840 | 1 | $C_I$ | 1616.88 | 81.02 | 283199 | 2 | $C_I$ | 1631.63 | 95.78 |
| 203921 | 2 | $C_I$ | 1616.92 | 81.07 | 262353 | 2 | $C_I$ | 1631.63 | 95.78 |
| 269082 | 2 | $C_I$ | 1616.94 | 81.09 | 274667 | 1 | $C_I$ | 1631.63 | 95.78 |
| 284457 | 1 | $C_I$ | 1616.95 | 81.10 | 262437 | 2 | $C_I$ | 1631.64 | 95.78 |
| 281487 | 1 | $C_I$ | 1616.97 | 81.11 | 231152 | 2 | $C_I$ | 1631.64 | 95.78 |
| 214727 | 1 | $C_I$ | 1616.98 | 81.12 | 269770 | 2 | $C_I$ | 1631.64 | 95.79 |
| 264148 | 1 | $C_I$ | 1617.00 | 81.15 | 207280 | 2 | $C_I$ | 1631.65 | 95.79 |
| 281563 | 2 | $C_I$ | 1617.01 | 81.15 | 253298 | 2 | $C_I$ | 1631.65 | 95.80 |
| 227660 | 1 | $C_I$ | 1617.01 | 81.16 | 268679 | 2 | $C_I$ | 1631.66 | 95.80 |
| 278419 | 2 | $C_I$ | 1617.02 | 81.16 | 205589 | 2 | $C_I$ | 1631.66 | 95.80 |
| 279057 | 1 | $C_I$ | 1617.03 | 81.18 | 251535 | 2 | $C_I$ | 1631.67 | 95.81 |
| 280093 | 1 | $C_I$ | 1617.04 | 81.18 | 252788 | 2 | $C_I$ | 1631.67 | 95.81 |
| 281707 | 1 | $C_I$ | 1617.04 | 81.18 | 256564 | 1 | $C_I$ | 1631.67 | 95.81 |
| 283881 | 1 | $C_I$ | 1617.07 | 81.21 | 283572 | 2 | $C_I$ | 1631.67 | 95.81 |

|        |   |       |         |       |        |   |       |         |       |
|--------|---|-------|---------|-------|--------|---|-------|---------|-------|
| 219001 | 1 | $C_s$ | 1617.07 | 81.22 | 274722 | 2 | $C_I$ | 1631.67 | 95.81 |
| 285660 | 0 | $C_I$ | 1617.08 | 81.22 | 279095 | 1 | $C_I$ | 1631.67 | 95.82 |
| 266080 | 1 | $C_I$ | 1617.11 | 81.26 | 214934 | 2 | $C_I$ | 1631.68 | 95.82 |
| 285171 | 1 | $C_I$ | 1617.12 | 81.27 | 285572 | 0 | $C_I$ | 1631.68 | 95.82 |
| 285698 | 0 | $C_I$ | 1617.13 | 81.27 | 229700 | 2 | $C_I$ | 1631.69 | 95.83 |
| 214135 | 1 | $C_I$ | 1617.13 | 81.28 | 239972 | 2 | $C_I$ | 1631.69 | 95.83 |
| 284475 | 1 | $C_I$ | 1617.14 | 81.28 | 282681 | 2 | $C_I$ | 1631.69 | 95.83 |
| 280112 | 1 | $C_I$ | 1617.17 | 81.31 | 277751 | 1 | $C_I$ | 1631.69 | 95.83 |
| 284311 | 1 | $C_I$ | 1617.17 | 81.31 | 236204 | 2 | $C_I$ | 1631.70 | 95.84 |
| 252781 | 1 | $C_I$ | 1617.18 | 81.33 | 269747 | 2 | $C_I$ | 1631.70 | 95.84 |
| 278981 | 1 | $C_I$ | 1617.20 | 81.34 | 251620 | 1 | $C_I$ | 1631.70 | 95.85 |
| 203266 | 2 | $C_I$ | 1617.23 | 81.37 | 283432 | 1 | $C_I$ | 1631.70 | 95.85 |
| 252821 | 1 | $C_I$ | 1617.25 | 81.40 | 229323 | 1 | $C_I$ | 1631.71 | 95.85 |
| 248446 | 1 | $C_I$ | 1617.25 | 81.40 | 277648 | 1 | $C_I$ | 1631.71 | 95.86 |
| 265832 | 2 | $C_I$ | 1617.26 | 81.41 | 277283 | 1 | $C_I$ | 1631.71 | 95.86 |
| 284778 | 1 | $C_I$ | 1617.27 | 81.41 | 273897 | 2 | $C_I$ | 1631.71 | 95.86 |
| 206357 | 1 | $C_I$ | 1617.29 | 81.43 | 273362 | 1 | $C_I$ | 1631.72 | 95.86 |
| 285655 | 0 | $C_I$ | 1617.29 | 81.44 | 203627 | 1 | $C_I$ | 1631.72 | 95.87 |
| 249841 | 1 | $C_I$ | 1617.30 | 81.45 | 207692 | 2 | $C_I$ | 1631.73 | 95.88 |
| 282711 | 2 | $C_I$ | 1617.31 | 81.45 | 280459 | 1 | $C_I$ | 1631.73 | 95.88 |
| 232072 | 1 | $C_I$ | 1617.32 | 81.47 | 262793 | 2 | $C_I$ | 1631.73 | 95.88 |
| 284660 | 1 | $C_I$ | 1617.33 | 81.47 | 282390 | 2 | $C_I$ | 1631.75 | 95.90 |

|        |   |       |         |       |        |   |       |         |       |
|--------|---|-------|---------|-------|--------|---|-------|---------|-------|
| 277268 | 1 | $C_I$ | 1617.33 | 81.47 | 205591 | 2 | $C_I$ | 1631.75 | 95.90 |
| 239863 | 1 | $C_I$ | 1617.33 | 81.47 | 215076 | 2 | $C_I$ | 1631.75 | 95.90 |
| 268475 | 2 | $C_I$ | 1617.34 | 81.48 | 268913 | 2 | $C_I$ | 1631.76 | 95.90 |
| 285182 | 1 | $C_I$ | 1617.36 | 81.50 | 250896 | 2 | $C_I$ | 1631.76 | 95.90 |
| 212674 | 2 | $C_I$ | 1617.37 | 81.51 | 204689 | 2 | $C_I$ | 1631.76 | 95.91 |
| 273894 | 1 | $C_I$ | 1617.38 | 81.52 | 262480 | 1 | $C_I$ | 1631.76 | 95.91 |
| 214644 | 2 | $C_I$ | 1617.39 | 81.53 | 215150 | 1 | $C_I$ | 1631.76 | 95.91 |
| 253641 | 1 | $C_I$ | 1617.39 | 81.54 | 284723 | 1 | $C_I$ | 1631.76 | 95.91 |
| 284871 | 2 | $C_I$ | 1617.40 | 81.54 | 214160 | 2 | $C_I$ | 1631.77 | 95.92 |
| 262399 | 1 | $C_I$ | 1617.43 | 81.57 | 203455 | 1 | $C_I$ | 1631.77 | 95.92 |
| 269170 | 2 | $C_I$ | 1617.47 | 81.62 | 256557 | 2 | $C_I$ | 1631.78 | 95.92 |
| 282118 | 1 | $C_I$ | 1617.49 | 81.64 | 262975 | 2 | $C_I$ | 1631.78 | 95.92 |
| 283520 | 2 | $C_I$ | 1617.51 | 81.66 | 237450 | 1 | $C_I$ | 1631.78 | 95.92 |
| 285763 | 0 | $C_I$ | 1617.52 | 81.66 | 234838 | 2 | $C_I$ | 1631.79 | 95.93 |
| 252809 | 2 | $C_I$ | 1617.54 | 81.68 | 251042 | 2 | $C_I$ | 1631.79 | 95.93 |
| 267240 | 1 | $C_I$ | 1617.56 | 81.71 | 273381 | 2 | $C_I$ | 1631.79 | 95.93 |
| 269074 | 2 | $C_I$ | 1617.57 | 81.72 | 212442 | 2 | $C_I$ | 1631.79 | 95.94 |
| 283914 | 1 | $C_I$ | 1617.59 | 81.74 | 267971 | 2 | $C_I$ | 1631.79 | 95.94 |
| 285493 | 0 | $C_I$ | 1617.60 | 81.75 | 227692 | 1 | $C_I$ | 1631.80 | 95.94 |
| 278539 | 1 | $C_I$ | 1617.61 | 81.76 | 268775 | 2 | $C_I$ | 1631.80 | 95.94 |
| 285644 | 0 | $C_I$ | 1617.62 | 81.76 | 216467 | 2 | $C_I$ | 1631.80 | 95.94 |
| 266815 | 1 | $C_I$ | 1617.63 | 81.77 | 268527 | 2 | $C_I$ | 1631.80 | 95.94 |

|        |   |       |         |       |        |   |       |         |       |
|--------|---|-------|---------|-------|--------|---|-------|---------|-------|
| 278556 | 2 | $C_I$ | 1617.63 | 81.77 | 268892 | 2 | $C_I$ | 1631.81 | 95.95 |
| 280088 | 2 | $C_I$ | 1617.63 | 81.77 | 280486 | 1 | $C_I$ | 1631.81 | 95.96 |
| 274872 | 1 | $C_I$ | 1617.64 | 81.79 | 280070 | 1 | $C_I$ | 1631.82 | 95.96 |
| 203467 | 1 | $C_I$ | 1617.66 | 81.80 | 242521 | 1 | $C_I$ | 1631.82 | 95.96 |
| 283992 | 1 | $C_I$ | 1617.66 | 81.81 | 264227 | 1 | $C_I$ | 1631.82 | 95.97 |
| 282577 | 2 | $C_I$ | 1617.66 | 81.81 | 247871 | 2 | $C_I$ | 1631.84 | 95.98 |
| 212150 | 1 | $C_I$ | 1617.68 | 81.82 | 210833 | 2 | $C_I$ | 1631.84 | 95.99 |
| 226583 | 1 | $C_I$ | 1617.68 | 81.82 | 273746 | 1 | $C_I$ | 1631.84 | 95.99 |
| 203275 | 2 | $C_I$ | 1617.69 | 81.84 | 254952 | 2 | $C_I$ | 1631.85 | 95.99 |
| 227661 | 1 | $C_I$ | 1617.71 | 81.86 | 265561 | 2 | $C_I$ | 1631.87 | 96.02 |
| 268693 | 2 | $C_I$ | 1617.73 | 81.87 | 270990 | 1 | $C_I$ | 1631.89 | 96.03 |
| 213084 | 1 | $C_I$ | 1617.75 | 81.90 | 252623 | 2 | $C_I$ | 1631.90 | 96.04 |
| 282424 | 1 | $C_I$ | 1617.75 | 81.90 | 256053 | 2 | $C_I$ | 1631.90 | 96.04 |
| 251183 | 1 | $C_I$ | 1617.76 | 81.91 | 211181 | 1 | $C_I$ | 1631.90 | 96.05 |
| 285483 | 0 | $C_I$ | 1617.78 | 81.93 | 251638 | 2 | $C_I$ | 1631.91 | 96.05 |
| 220457 | 1 | $C_I$ | 1617.79 | 81.93 | 280192 | 1 | $C_I$ | 1631.91 | 96.06 |
| 268436 | 1 | $C_I$ | 1617.79 | 81.93 | 243783 | 2 | $C_I$ | 1631.92 | 96.07 |
| 282336 | 2 | $C_I$ | 1617.79 | 81.93 | 278978 | 1 | $C_I$ | 1631.92 | 96.07 |
| 281806 | 2 | $C_I$ | 1617.79 | 81.94 | 214831 | 2 | $C_I$ | 1631.92 | 96.07 |
| 268698 | 2 | $C_I$ | 1617.79 | 81.94 | 278587 | 2 | $C_I$ | 1631.93 | 96.07 |
| 262863 | 1 | $C_I$ | 1617.82 | 81.97 | 268177 | 2 | $C_I$ | 1631.93 | 96.07 |
| 266234 | 2 | $C_I$ | 1617.83 | 81.98 | 283812 | 1 | $C_I$ | 1631.93 | 96.07 |



|        |   |       |         |       |        |   |       |         |       |
|--------|---|-------|---------|-------|--------|---|-------|---------|-------|
| 212093 | 2 | $C_I$ | 1617.84 | 81.98 | 201458 | 2 | $C_I$ | 1631.94 | 96.08 |
| 277079 | 2 | $C_I$ | 1617.85 | 82.00 | 213809 | 2 | $C_I$ | 1631.94 | 96.09 |
| 248430 | 1 | $C_I$ | 1617.86 | 82.00 | 283055 | 1 | $C_I$ | 1631.94 | 96.09 |
| 262433 | 1 | $C_I$ | 1617.86 | 82.01 | 285187 | 2 | $C_I$ | 1631.95 | 96.09 |
| 285781 | 0 | $C_2$ | 1617.87 | 82.01 | 251594 | 2 | $C_I$ | 1631.95 | 96.09 |
| 274024 | 1 | $C_I$ | 1617.88 | 82.03 | 265798 | 2 | $C_I$ | 1631.95 | 96.10 |
| 182256 | 2 | $C_I$ | 1617.89 | 82.04 | 271237 | 2 | $C_I$ | 1631.96 | 96.10 |
| 282160 | 1 | $C_I$ | 1617.90 | 82.04 | 284382 | 2 | $C_I$ | 1631.96 | 96.11 |
| 273921 | 1 | $C_I$ | 1617.91 | 82.05 | 212971 | 1 | $C_I$ | 1631.97 | 96.11 |
| 207361 | 1 | $C_I$ | 1617.91 | 82.05 | 216427 | 2 | $C_I$ | 1631.97 | 96.11 |
| 276170 | 2 | $C_I$ | 1617.91 | 82.05 | 279695 | 2 | $C_I$ | 1631.97 | 96.12 |
| 203277 | 1 | $C_I$ | 1617.93 | 82.08 | 263575 | 2 | $C_I$ | 1631.98 | 96.12 |
| 269036 | 2 | $C_I$ | 1617.97 | 82.11 | 248123 | 2 | $C_I$ | 1631.98 | 96.12 |
| 262923 | 1 | $C_I$ | 1617.98 | 82.12 | 276063 | 2 | $C_I$ | 1631.98 | 96.12 |
| 285290 | 1 | $C_I$ | 1617.99 | 82.13 | 271011 | 1 | $C_I$ | 1631.99 | 96.13 |
| 282944 | 1 | $C_I$ | 1618.00 | 82.14 | 262337 | 2 | $C_I$ | 1632.00 | 96.14 |
| 235746 | 1 | $C_I$ | 1618.04 | 82.18 | 269045 | 2 | $C_I$ | 1632.00 | 96.14 |
| 274825 | 2 | $C_I$ | 1618.04 | 82.18 | 205628 | 1 | $C_I$ | 1632.00 | 96.15 |
| 203804 | 2 | $C_I$ | 1618.05 | 82.20 | 264440 | 2 | $C_I$ | 1632.00 | 96.15 |
| 228710 | 1 | $C_I$ | 1618.06 | 82.21 | 282783 | 1 | $C_I$ | 1632.01 | 96.15 |
| 207196 | 2 | $C_I$ | 1618.07 | 82.21 | 285436 | 2 | $C_I$ | 1632.01 | 96.15 |
| 284847 | 2 | $C_I$ | 1618.07 | 82.22 | 281418 | 1 | $C_I$ | 1632.01 | 96.15 |

|        |   |       |         |       |        |   |       |         |       |
|--------|---|-------|---------|-------|--------|---|-------|---------|-------|
| 276081 | 2 | $C_I$ | 1618.07 | 82.22 | 215137 | 2 | $C_I$ | 1632.02 | 96.16 |
| 285246 | 1 | $C_I$ | 1618.09 | 82.24 | 214858 | 1 | $C_I$ | 1632.02 | 96.16 |
| 282031 | 2 | $C_I$ | 1618.10 | 82.24 | 282915 | 2 | $C_I$ | 1632.02 | 96.17 |
| 280456 | 1 | $C_I$ | 1618.11 | 82.26 | 262821 | 1 | $C_I$ | 1632.03 | 96.17 |
| 281322 | 1 | $C_I$ | 1618.13 | 82.28 | 266572 | 1 | $C_I$ | 1632.03 | 96.17 |
| 285878 | 0 | $C_I$ | 1618.14 | 82.29 | 285271 | 2 | $C_I$ | 1632.03 | 96.18 |
| 214936 | 2 | $C_I$ | 1618.15 | 82.29 | 268771 | 1 | $C_I$ | 1632.03 | 96.18 |
| 282814 | 1 | $C_I$ | 1618.16 | 82.30 | 205601 | 2 | $C_I$ | 1632.04 | 96.18 |
| 269776 | 2 | $C_I$ | 1618.20 | 82.34 | 276921 | 2 | $C_I$ | 1632.04 | 96.18 |
| 262849 | 1 | $C_I$ | 1618.20 | 82.34 | 212183 | 2 | $C_I$ | 1632.05 | 96.19 |
| 215149 | 1 | $C_I$ | 1618.21 | 82.35 | 276607 | 2 | $C_I$ | 1632.05 | 96.20 |
| 253769 | 1 | $C_I$ | 1618.21 | 82.36 | 251727 | 2 | $C_I$ | 1632.05 | 96.20 |
| 285216 | 1 | $C_I$ | 1618.23 | 82.38 | 269055 | 1 | $C_I$ | 1632.05 | 96.20 |
| 267201 | 2 | $C_I$ | 1618.24 | 82.38 | 283684 | 2 | $C_I$ | 1632.06 | 96.20 |
| 252543 | 1 | $C_I$ | 1618.24 | 82.39 | 227902 | 1 | $C_I$ | 1632.06 | 96.20 |
| 282358 | 2 | $C_I$ | 1618.25 | 82.39 | 210793 | 2 | $C_I$ | 1632.06 | 96.20 |
| 265579 | 2 | $C_I$ | 1618.25 | 82.40 | 285621 | 0 | $C_I$ | 1632.07 | 96.21 |
| 269386 | 1 | $C_I$ | 1618.26 | 82.40 | 212031 | 2 | $C_I$ | 1632.07 | 96.21 |
| 213788 | 1 | $C_I$ | 1618.26 | 82.41 | 212353 | 2 | $C_I$ | 1632.07 | 96.22 |
| 268684 | 2 | $C_I$ | 1618.27 | 82.42 | 240237 | 2 | $C_I$ | 1632.08 | 96.22 |
| 281535 | 2 | $C_I$ | 1618.31 | 82.45 | 262406 | 2 | $C_I$ | 1632.08 | 96.22 |
| 220222 | 1 | $C_I$ | 1618.31 | 82.46 | 268762 | 2 | $C_I$ | 1632.08 | 96.22 |

|        |   |       |         |       |        |   |       |         |       |
|--------|---|-------|---------|-------|--------|---|-------|---------|-------|
| 251047 | 1 | $C_1$ | 1618.31 | 82.46 | 227514 | 2 | $C_1$ | 1632.08 | 96.23 |
| 203260 | 1 | $C_1$ | 1618.32 | 82.46 | 282829 | 1 | $C_1$ | 1632.09 | 96.24 |
| 279750 | 1 | $C_1$ | 1618.35 | 82.49 | 282623 | 2 | $C_1$ | 1632.09 | 96.24 |
| 282438 | 2 | $C_1$ | 1618.35 | 82.50 | 212599 | 2 | $C_1$ | 1632.10 | 96.24 |
| 265803 | 2 | $C_1$ | 1618.39 | 82.53 | 235160 | 2 | $C_1$ | 1632.10 | 96.25 |
| 282794 | 1 | $C_1$ | 1618.40 | 82.54 | 268116 | 2 | $C_1$ | 1632.11 | 96.25 |
| 282602 | 2 | $C_1$ | 1618.40 | 82.54 | 250855 | 2 | $C_1$ | 1632.11 | 96.26 |
| 285538 | 0 | $C_1$ | 1618.41 | 82.55 | 254216 | 2 | $C_1$ | 1632.13 | 96.28 |
| 266011 | 2 | $C_1$ | 1618.41 | 82.56 | 232433 | 1 | $C_1$ | 1632.13 | 96.28 |
| 281566 | 1 | $C_1$ | 1618.41 | 82.56 | 235560 | 2 | $C_1$ | 1632.13 | 96.28 |
| 268497 | 2 | $C_1$ | 1618.42 | 82.56 | 277100 | 2 | $C_1$ | 1632.15 | 96.30 |
| 214999 | 1 | $C_1$ | 1618.46 | 82.61 | 283570 | 2 | $C_1$ | 1632.15 | 96.30 |
| 251383 | 1 | $C_1$ | 1618.48 | 82.62 | 278921 | 2 | $C_1$ | 1632.15 | 96.30 |
| 212669 | 2 | $C_1$ | 1618.48 | 82.63 | 265887 | 1 | $C_1$ | 1632.16 | 96.30 |
| 207996 | 2 | $C_1$ | 1618.49 | 82.63 | 236741 | 2 | $C_1$ | 1632.16 | 96.30 |
| 284885 | 2 | $C_1$ | 1618.50 | 82.65 | 215890 | 2 | $C_1$ | 1632.16 | 96.30 |
| 269225 | 2 | $C_1$ | 1618.51 | 82.66 | 265906 | 2 | $C_1$ | 1632.16 | 96.30 |
| 285773 | 0 | $C_2$ | 1618.52 | 82.67 | 277170 | 2 | $C_1$ | 1632.17 | 96.31 |
| 282590 | 1 | $C_1$ | 1618.52 | 82.67 | 236377 | 2 | $C_1$ | 1632.17 | 96.31 |
| 277442 | 2 | $C_1$ | 1618.53 | 82.67 | 255904 | 2 | $C_1$ | 1632.17 | 96.31 |
| 282995 | 1 | $C_1$ | 1618.53 | 82.67 | 268490 | 2 | $C_1$ | 1632.17 | 96.32 |
| 236181 | 2 | $C_1$ | 1618.53 | 82.68 | 279043 | 1 | $C_1$ | 1632.18 | 96.32 |

|        |   |       |         |       |        |   |       |         |       |
|--------|---|-------|---------|-------|--------|---|-------|---------|-------|
| 212054 | 1 | $C_I$ | 1618.54 | 82.69 | 203660 | 2 | $C_I$ | 1632.18 | 96.32 |
| 275917 | 1 | $C_I$ | 1618.55 | 82.69 | 276626 | 1 | $C_I$ | 1632.18 | 96.33 |
| 284337 | 1 | $C_I$ | 1618.57 | 82.71 | 226537 | 1 | $C_I$ | 1632.18 | 96.33 |
| 263195 | 2 | $C_I$ | 1618.58 | 82.72 | 219974 | 1 | $C_I$ | 1632.19 | 96.33 |
| 284914 | 1 | $C_I$ | 1618.59 | 82.73 | 235965 | 2 | $C_I$ | 1632.19 | 96.33 |
| 266052 | 2 | $C_I$ | 1618.61 | 82.75 | 277056 | 1 | $C_I$ | 1632.20 | 96.34 |
| 282738 | 1 | $C_I$ | 1618.62 | 82.77 | 191627 | 2 | $C_I$ | 1632.20 | 96.34 |
| 281540 | 1 | $C_I$ | 1618.65 | 82.80 | 214851 | 2 | $C_I$ | 1632.20 | 96.35 |
| 187859 | 2 | $C_I$ | 1618.65 | 82.80 | 254295 | 2 | $C_I$ | 1632.20 | 96.35 |
| 281455 | 1 | $C_I$ | 1618.66 | 82.80 | 284619 | 1 | $C_I$ | 1632.21 | 96.35 |
| 213663 | 1 | $C_I$ | 1618.66 | 82.80 | 275971 | 2 | $C_I$ | 1632.22 | 96.36 |
| 285192 | 1 | $C_I$ | 1618.67 | 82.81 | 222876 | 2 | $C_I$ | 1632.22 | 96.36 |
| 284664 | 1 | $C_I$ | 1618.67 | 82.81 | 284698 | 1 | $C_I$ | 1632.22 | 96.37 |
| 285185 | 2 | $C_I$ | 1618.67 | 82.81 | 263335 | 2 | $C_I$ | 1632.23 | 96.37 |
| 269076 | 2 | $C_I$ | 1618.67 | 82.81 | 188534 | 2 | $C_I$ | 1632.24 | 96.39 |
| 205619 | 1 | $C_I$ | 1618.68 | 82.83 | 203911 | 2 | $C_I$ | 1632.25 | 96.39 |
| 266543 | 1 | $C_I$ | 1618.69 | 82.84 | 282862 | 1 | $C_I$ | 1632.25 | 96.39 |
| 281508 | 2 | $C_I$ | 1618.69 | 82.84 | 191612 | 2 | $C_I$ | 1632.26 | 96.40 |
| 284326 | 1 | $C_I$ | 1618.70 | 82.85 | 242274 | 1 | $C_I$ | 1632.26 | 96.40 |
| 282565 | 2 | $C_I$ | 1618.71 | 82.85 | 262908 | 1 | $C_I$ | 1632.26 | 96.40 |
| 285411 | 1 | $C_I$ | 1618.73 | 82.87 | 282886 | 2 | $C_I$ | 1632.26 | 96.41 |
| 227415 | 2 | $C_I$ | 1618.75 | 82.90 | 236335 | 2 | $C_I$ | 1632.27 | 96.42 |

|        |   |          |         |       |        |   |       |         |       |
|--------|---|----------|---------|-------|--------|---|-------|---------|-------|
| 284882 | 2 | $C_I$    | 1618.76 | 82.90 | 285749 | 0 | $C_I$ | 1632.28 | 96.42 |
| 273905 | 1 | $C_I$    | 1618.76 | 82.90 | 215708 | 2 | $C_I$ | 1632.28 | 96.42 |
| 285810 | 0 | $C_{2v}$ | 1618.77 | 82.91 | 251390 | 2 | $C_I$ | 1632.28 | 96.43 |
| 278721 | 2 | $C_I$    | 1618.78 | 82.92 | 266781 | 2 | $C_I$ | 1632.28 | 96.43 |
| 268666 | 1 | $C_I$    | 1618.79 | 82.93 | 283137 | 2 | $C_I$ | 1632.31 | 96.46 |
| 251603 | 1 | $C_I$    | 1618.79 | 82.93 | 239249 | 1 | $C_I$ | 1632.32 | 96.46 |
| 285247 | 2 | $C_I$    | 1618.80 | 82.94 | 262350 | 2 | $C_I$ | 1632.32 | 96.47 |
| 269086 | 1 | $C_I$    | 1618.81 | 82.96 | 234024 | 2 | $C_I$ | 1632.33 | 96.47 |
| 281417 | 1 | $C_I$    | 1618.81 | 82.96 | 276269 | 2 | $C_I$ | 1632.35 | 96.49 |
| 269223 | 2 | $C_I$    | 1618.83 | 82.97 | 284300 | 2 | $C_I$ | 1632.35 | 96.49 |
| 278718 | 2 | $C_I$    | 1618.84 | 82.99 | 284688 | 1 | $C_I$ | 1632.36 | 96.51 |
| 265805 | 1 | $C_I$    | 1618.89 | 83.03 | 229701 | 2 | $C_I$ | 1632.36 | 96.51 |
| 282101 | 2 | $C_I$    | 1618.89 | 83.04 | 247132 | 2 | $C_I$ | 1632.36 | 96.51 |
| 275966 | 2 | $C_I$    | 1618.90 | 83.04 | 278748 | 2 | $C_I$ | 1632.37 | 96.51 |
| 266592 | 2 | $C_I$    | 1618.91 | 83.06 | 282996 | 1 | $C_I$ | 1632.37 | 96.52 |
| 269149 | 2 | $C_I$    | 1618.94 | 83.08 | 232123 | 1 | $C_I$ | 1632.39 | 96.54 |
| 285607 | 0 | $C_I$    | 1618.95 | 83.09 | 280079 | 1 | $C_I$ | 1632.40 | 96.54 |
| 214195 | 2 | $C_I$    | 1618.95 | 83.10 | 251074 | 2 | $C_I$ | 1632.41 | 96.55 |
| 252579 | 1 | $C_I$    | 1618.96 | 83.10 | 284839 | 1 | $C_I$ | 1632.41 | 96.56 |
| 278891 | 1 | $C_I$    | 1618.96 | 83.10 | 279489 | 2 | $C_I$ | 1632.41 | 96.56 |
| 213958 | 2 | $C_I$    | 1618.96 | 83.10 | 215334 | 2 | $C_I$ | 1632.42 | 96.56 |
| 274504 | 1 | $C_I$    | 1618.97 | 83.11 | 248586 | 2 | $C_I$ | 1632.42 | 96.56 |

|        |   |       |         |       |        |   |       |         |       |
|--------|---|-------|---------|-------|--------|---|-------|---------|-------|
| 214147 | 1 | $C_1$ | 1618.97 | 83.12 | 277746 | 1 | $C_1$ | 1632.42 | 96.57 |
| 280767 | 1 | $C_1$ | 1618.99 | 83.13 | 267013 | 2 | $C_1$ | 1632.43 | 96.58 |
| 282409 | 1 | $C_1$ | 1618.99 | 83.14 | 284442 | 2 | $C_1$ | 1632.44 | 96.58 |
| 278398 | 1 | $C_2$ | 1619.00 | 83.14 | 285546 | 0 | $C_1$ | 1632.44 | 96.59 |
| 284909 | 1 | $C_1$ | 1619.01 | 83.15 | 269104 | 1 | $C_1$ | 1632.44 | 96.59 |
| 284618 | 1 | $C_1$ | 1619.02 | 83.16 | 228543 | 1 | $C_1$ | 1632.45 | 96.59 |
| 215862 | 2 | $C_1$ | 1619.02 | 83.16 | 226747 | 2 | $C_1$ | 1632.45 | 96.60 |
| 282441 | 1 | $C_1$ | 1619.02 | 83.17 | 271181 | 2 | $C_1$ | 1632.45 | 96.60 |
| 283683 | 2 | $C_1$ | 1619.03 | 83.17 | 271929 | 2 | $C_1$ | 1632.46 | 96.60 |
| 277718 | 1 | $C_1$ | 1619.04 | 83.19 | 282419 | 2 | $C_1$ | 1632.47 | 96.61 |
| 228694 | 1 | $C_1$ | 1619.05 | 83.19 | 212806 | 2 | $C_1$ | 1632.47 | 96.62 |
| 204037 | 2 | $C_1$ | 1619.05 | 83.20 | 280362 | 1 | $C_1$ | 1632.47 | 96.62 |
| 284680 | 1 | $C_1$ | 1619.06 | 83.20 | 204745 | 2 | $C_1$ | 1632.47 | 96.62 |
| 282318 | 1 | $C_1$ | 1619.06 | 83.20 | 219529 | 2 | $C_1$ | 1632.48 | 96.62 |
| 283752 | 1 | $C_1$ | 1619.06 | 83.20 | 232109 | 1 | $C_1$ | 1632.48 | 96.63 |
| 285876 | 0 | $C_2$ | 1619.07 | 83.21 | 205211 | 1 | $C_1$ | 1632.49 | 96.63 |
| 236673 | 2 | $C_1$ | 1619.07 | 83.22 | 207076 | 2 | $C_1$ | 1632.49 | 96.63 |
| 285699 | 0 | $C_1$ | 1619.07 | 83.22 | 281401 | 1 | $C_1$ | 1632.51 | 96.65 |
| 285296 | 1 | $C_1$ | 1619.10 | 83.24 | 278992 | 2 | $C_1$ | 1632.51 | 96.65 |
| 267014 | 2 | $C_1$ | 1619.10 | 83.25 | 237113 | 2 | $C_1$ | 1632.51 | 96.65 |
| 279065 | 1 | $C_1$ | 1619.11 | 83.26 | 281820 | 2 | $C_1$ | 1632.52 | 96.67 |
| 285190 | 1 | $C_1$ | 1619.11 | 83.26 | 277300 | 2 | $C_1$ | 1632.53 | 96.67 |

|        |   |       |         |       |        |   |       |         |       |
|--------|---|-------|---------|-------|--------|---|-------|---------|-------|
| 274869 | 2 | $C_I$ | 1619.12 | 83.27 | 269951 | 2 | $C_I$ | 1632.53 | 96.67 |
| 282052 | 1 | $C_I$ | 1619.13 | 83.27 | 285870 | 0 | $C_I$ | 1632.53 | 96.68 |
| 252576 | 1 | $C_I$ | 1619.14 | 83.29 | 265778 | 2 | $C_I$ | 1632.54 | 96.68 |
| 270930 | 1 | $C_I$ | 1619.16 | 83.31 | 269194 | 2 | $C_I$ | 1632.54 | 96.68 |
| 203908 | 2 | $C_I$ | 1619.18 | 83.32 | 283446 | 1 | $C_I$ | 1632.54 | 96.69 |
| 284775 | 1 | $C_I$ | 1619.23 | 83.37 | 284401 | 1 | $C_I$ | 1632.54 | 96.69 |
| 285787 | 0 | $C_I$ | 1619.25 | 83.39 | 282513 | 2 | $C_I$ | 1632.54 | 96.69 |
| 278425 | 1 | $C_I$ | 1619.26 | 83.41 | 268927 | 2 | $C_I$ | 1632.55 | 96.70 |
| 280111 | 1 | $C_I$ | 1619.27 | 83.41 | 272667 | 2 | $C_I$ | 1632.55 | 96.70 |
| 207043 | 1 | $C_I$ | 1619.28 | 83.43 | 244448 | 1 | $C_I$ | 1632.55 | 96.70 |
| 270988 | 1 | $C_I$ | 1619.28 | 83.43 | 282682 | 2 | $C_I$ | 1632.55 | 96.70 |
| 277237 | 1 | $C_I$ | 1619.30 | 83.44 | 283908 | 1 | $C_I$ | 1632.56 | 96.70 |
| 284706 | 1 | $C_I$ | 1619.31 | 83.45 | 220176 | 2 | $C_I$ | 1632.56 | 96.71 |
| 265594 | 2 | $C_I$ | 1619.35 | 83.50 | 212446 | 2 | $C_I$ | 1632.56 | 96.71 |
| 239953 | 2 | $C_I$ | 1619.36 | 83.50 | 203505 | 2 | $C_I$ | 1632.57 | 96.72 |
| 277089 | 2 | $C_I$ | 1619.36 | 83.51 | 269083 | 2 | $C_I$ | 1632.58 | 96.72 |
| 266008 | 2 | $C_I$ | 1619.38 | 83.53 | 281097 | 2 | $C_I$ | 1632.58 | 96.72 |
| 285350 | 2 | $C_I$ | 1619.39 | 83.53 | 270535 | 2 | $C_I$ | 1632.58 | 96.72 |
| 269400 | 2 | $C_I$ | 1619.39 | 83.54 | 206890 | 2 | $C_I$ | 1632.58 | 96.73 |
| 270950 | 1 | $C_I$ | 1619.41 | 83.56 | 283602 | 2 | $C_I$ | 1632.58 | 96.73 |
| 282525 | 2 | $C_I$ | 1619.42 | 83.56 | 176868 | 2 | $C_I$ | 1632.58 | 96.73 |
| 270918 | 2 | $C_I$ | 1619.44 | 83.58 | 270688 | 1 | $C_I$ | 1632.59 | 96.73 |

|        |   |       |         |       |        |   |       |         |       |
|--------|---|-------|---------|-------|--------|---|-------|---------|-------|
| 285486 | 0 | $C_2$ | 1619.44 | 83.59 | 266499 | 2 | $C_1$ | 1632.59 | 96.73 |
| 255880 | 1 | $C_1$ | 1619.45 | 83.59 | 251005 | 1 | $C_1$ | 1632.59 | 96.74 |
| 275648 | 2 | $C_1$ | 1619.46 | 83.61 | 212145 | 2 | $C_1$ | 1632.59 | 96.74 |
| 268520 | 1 | $C_1$ | 1619.46 | 83.61 | 263592 | 1 | $C_1$ | 1632.60 | 96.75 |
| 277646 | 1 | $C_1$ | 1619.46 | 83.61 | 269901 | 2 | $C_1$ | 1632.60 | 96.75 |
| 268824 | 2 | $C_1$ | 1619.47 | 83.62 | 265581 | 2 | $C_1$ | 1632.60 | 96.75 |
| 258287 | 1 | $C_1$ | 1619.49 | 83.63 | 262343 | 2 | $C_1$ | 1632.61 | 96.75 |
| 252583 | 2 | $C_1$ | 1619.50 | 83.64 | 235975 | 2 | $C_1$ | 1632.61 | 96.76 |
| 252862 | 2 | $C_1$ | 1619.51 | 83.65 | 215614 | 2 | $C_1$ | 1632.62 | 96.77 |
| 214998 | 1 | $C_1$ | 1619.51 | 83.66 | 282683 | 2 | $C_1$ | 1632.62 | 96.77 |
| 273895 | 1 | $C_1$ | 1619.51 | 83.66 | 236101 | 2 | $C_1$ | 1632.63 | 96.77 |
| 159693 | 2 | $C_1$ | 1619.53 | 83.67 | 280466 | 1 | $C_1$ | 1632.64 | 96.78 |
| 210707 | 1 | $C_1$ | 1619.53 | 83.67 | 282559 | 2 | $C_1$ | 1632.64 | 96.79 |
| 284998 | 1 | $C_1$ | 1619.53 | 83.68 | 212556 | 2 | $C_1$ | 1632.65 | 96.80 |
| 281574 | 2 | $C_1$ | 1619.53 | 83.68 | 278942 | 1 | $C_1$ | 1632.66 | 96.80 |
| 282863 | 1 | $C_1$ | 1619.54 | 83.69 | 215884 | 2 | $C_1$ | 1632.66 | 96.81 |
| 239345 | 1 | $C_1$ | 1619.55 | 83.69 | 265483 | 2 | $C_1$ | 1632.67 | 96.81 |
| 212103 | 1 | $C_1$ | 1619.55 | 83.70 | 274816 | 2 | $C_1$ | 1632.67 | 96.81 |
| 285727 | 0 | $C_1$ | 1619.56 | 83.70 | 269085 | 2 | $C_1$ | 1632.67 | 96.81 |
| 241912 | 1 | $C_1$ | 1619.57 | 83.72 | 227966 | 2 | $C_1$ | 1632.67 | 96.82 |
| 265826 | 2 | $C_1$ | 1619.57 | 83.72 | 239882 | 2 | $C_1$ | 1632.69 | 96.83 |
| 282608 | 2 | $C_1$ | 1619.59 | 83.74 | 283130 | 2 | $C_1$ | 1632.70 | 96.84 |



|        |   |       |         |       |        |   |       |         |       |
|--------|---|-------|---------|-------|--------|---|-------|---------|-------|
| 282609 | 2 | $C_I$ | 1619.59 | 83.74 | 282514 | 2 | $C_I$ | 1632.70 | 96.84 |
| 284313 | 1 | $C_I$ | 1619.61 | 83.75 | 276383 | 1 | $C_I$ | 1632.71 | 96.85 |
| 281219 | 2 | $C_I$ | 1619.63 | 83.77 | 276052 | 2 | $C_I$ | 1632.71 | 96.85 |
| 282612 | 2 | $C_I$ | 1619.64 | 83.78 | 283002 | 2 | $C_I$ | 1632.71 | 96.85 |
| 285481 | 0 | $C_2$ | 1619.65 | 83.79 | 228227 | 2 | $C_I$ | 1632.71 | 96.85 |
| 269230 | 1 | $C_I$ | 1619.65 | 83.80 | 283423 | 2 | $C_I$ | 1632.73 | 96.87 |
| 212427 | 2 | $C_I$ | 1619.65 | 83.80 | 282192 | 2 | $C_I$ | 1632.73 | 96.88 |
| 284824 | 1 | $C_I$ | 1619.66 | 83.81 | 284718 | 2 | $C_I$ | 1632.73 | 96.88 |
| 285670 | 0 | $C_I$ | 1619.67 | 83.82 | 235715 | 2 | $C_I$ | 1632.74 | 96.88 |
| 251595 | 1 | $C_I$ | 1619.68 | 83.83 | 266843 | 1 | $C_I$ | 1632.74 | 96.88 |
| 276366 | 2 | $C_I$ | 1619.69 | 83.84 | 265998 | 2 | $C_I$ | 1632.74 | 96.88 |
| 278600 | 2 | $C_I$ | 1619.69 | 83.84 | 279524 | 2 | $C_I$ | 1632.75 | 96.89 |
| 252644 | 2 | $C_I$ | 1619.70 | 83.84 | 207096 | 2 | $C_I$ | 1632.75 | 96.89 |
| 285740 | 0 | $C_I$ | 1619.70 | 83.85 | 283711 | 2 | $C_I$ | 1632.76 | 96.91 |
| 234808 | 1 | $C_I$ | 1619.71 | 83.85 | 187862 | 2 | $C_I$ | 1632.76 | 96.91 |
| 236560 | 1 | $C_I$ | 1619.71 | 83.85 | 216248 | 2 | $C_I$ | 1632.77 | 96.91 |
| 283268 | 2 | $C_I$ | 1619.71 | 83.86 | 224129 | 1 | $C_I$ | 1632.78 | 96.92 |
| 237420 | 1 | $C_I$ | 1619.72 | 83.87 | 203483 | 2 | $C_I$ | 1632.78 | 96.92 |
| 218961 | 1 | $C_S$ | 1619.73 | 83.87 | 215562 | 2 | $C_I$ | 1632.79 | 96.93 |
| 269358 | 1 | $C_I$ | 1619.75 | 83.89 | 282896 | 2 | $C_I$ | 1632.79 | 96.93 |
| 251165 | 1 | $C_I$ | 1619.75 | 83.89 | 215112 | 1 | $C_I$ | 1632.79 | 96.94 |
| 265787 | 2 | $C_I$ | 1619.75 | 83.90 | 252450 | 2 | $C_I$ | 1632.79 | 96.94 |

|        |   |       |         |       |        |   |       |         |       |
|--------|---|-------|---------|-------|--------|---|-------|---------|-------|
| 274002 | 2 | $C_I$ | 1619.76 | 83.90 | 275155 | 2 | $C_I$ | 1632.80 | 96.94 |
| 239946 | 1 | $C_I$ | 1619.76 | 83.90 | 284309 | 2 | $C_I$ | 1632.80 | 96.94 |
| 282543 | 2 | $C_I$ | 1619.77 | 83.91 | 277176 | 2 | $C_I$ | 1632.80 | 96.95 |
| 285367 | 1 | $C_S$ | 1619.78 | 83.92 | 231199 | 2 | $C_I$ | 1632.81 | 96.95 |
| 273923 | 1 | $C_I$ | 1619.80 | 83.94 | 285144 | 2 | $C_I$ | 1632.81 | 96.95 |
| 283051 | 1 | $C_I$ | 1619.80 | 83.95 | 269784 | 2 | $C_I$ | 1632.81 | 96.96 |
| 282339 | 2 | $C_I$ | 1619.82 | 83.96 | 237429 | 1 | $C_I$ | 1632.81 | 96.96 |
| 277057 | 1 | $C_I$ | 1619.84 | 83.99 | 283576 | 2 | $C_I$ | 1632.82 | 96.96 |
| 282000 | 2 | $C_I$ | 1619.84 | 83.99 | 252574 | 1 | $C_I$ | 1632.82 | 96.97 |
| 252921 | 1 | $C_I$ | 1619.85 | 83.99 | 277327 | 2 | $C_I$ | 1632.83 | 96.97 |
| 251380 | 1 | $C_I$ | 1619.87 | 84.02 | 251641 | 2 | $C_I$ | 1632.83 | 96.97 |
| 273992 | 1 | $C_I$ | 1619.87 | 84.02 | 206766 | 1 | $C_I$ | 1632.83 | 96.97 |
| 235021 | 1 | $C_I$ | 1619.88 | 84.02 | 276133 | 2 | $C_I$ | 1632.83 | 96.97 |
| 270935 | 2 | $C_I$ | 1619.88 | 84.03 | 282028 | 2 | $C_I$ | 1632.84 | 96.99 |
| 203276 | 2 | $C_I$ | 1619.91 | 84.05 | 283126 | 2 | $C_I$ | 1632.85 | 96.99 |
| 282089 | 2 | $C_I$ | 1619.92 | 84.06 | 281406 | 2 | $C_I$ | 1632.86 | 97.00 |
| 278333 | 1 | $C_I$ | 1619.97 | 84.12 | 237100 | 2 | $C_I$ | 1632.86 | 97.00 |
| 250854 | 2 | $C_I$ | 1619.99 | 84.14 | 236226 | 2 | $C_I$ | 1632.86 | 97.00 |
| 267172 | 2 | $C_I$ | 1620.00 | 84.14 | 254479 | 2 | $C_I$ | 1632.86 | 97.01 |
| 282596 | 1 | $C_I$ | 1620.01 | 84.16 | 215887 | 1 | $C_I$ | 1632.86 | 97.01 |
| 281303 | 1 | $C_I$ | 1620.02 | 84.17 | 281144 | 2 | $C_I$ | 1632.87 | 97.01 |
| 284662 | 1 | $C_I$ | 1620.02 | 84.17 | 256198 | 2 | $C_I$ | 1632.87 | 97.01 |

|        |   |       |         |       |        |   |       |         |       |
|--------|---|-------|---------|-------|--------|---|-------|---------|-------|
| 281283 | 1 | $C_I$ | 1620.02 | 84.17 | 281405 | 1 | $C_I$ | 1632.87 | 97.02 |
| 285005 | 1 | $C_I$ | 1620.04 | 84.19 | 224130 | 1 | $C_I$ | 1632.88 | 97.03 |
| 206282 | 1 | $C_I$ | 1620.05 | 84.19 | 223035 | 1 | $C_I$ | 1632.89 | 97.04 |
| 284458 | 1 | $C_I$ | 1620.05 | 84.20 | 282811 | 2 | $C_I$ | 1632.89 | 97.04 |
| 276597 | 2 | $C_I$ | 1620.07 | 84.21 | 191675 | 2 | $C_I$ | 1632.89 | 97.04 |
| 268565 | 1 | $C_I$ | 1620.07 | 84.22 | 268691 | 2 | $C_I$ | 1632.89 | 97.04 |
| 282872 | 1 | $C_I$ | 1620.09 | 84.24 | 275204 | 2 | $C_I$ | 1632.89 | 97.04 |
| 203484 | 1 | $C_I$ | 1620.11 | 84.26 | 226343 | 2 | $C_I$ | 1632.90 | 97.05 |
| 285272 | 2 | $C_I$ | 1620.12 | 84.26 | 223505 | 2 | $C_I$ | 1632.90 | 97.05 |
| 236027 | 2 | $C_I$ | 1620.12 | 84.27 | 236215 | 2 | $C_I$ | 1632.91 | 97.05 |
| 228354 | 1 | $C_I$ | 1620.12 | 84.27 | 282418 | 2 | $C_I$ | 1632.91 | 97.06 |
| 265573 | 2 | $C_I$ | 1620.13 | 84.27 | 215200 | 1 | $C_I$ | 1632.92 | 97.06 |
| 213787 | 1 | $C_I$ | 1620.13 | 84.27 | 265646 | 1 | $C_I$ | 1632.92 | 97.07 |
| 285774 | 0 | $C_I$ | 1620.14 | 84.29 | 263119 | 2 | $C_I$ | 1632.92 | 97.07 |
| 284480 | 1 | $C_I$ | 1620.15 | 84.29 | 184821 | 2 | $C_I$ | 1632.92 | 97.07 |
| 232080 | 1 | $C_I$ | 1620.16 | 84.31 | 264281 | 2 | $C_I$ | 1632.93 | 97.07 |
| 285907 | 0 | $C_S$ | 1620.19 | 84.33 | 284356 | 1 | $C_I$ | 1632.93 | 97.08 |
| 236003 | 2 | $C_I$ | 1620.20 | 84.34 | 281078 | 1 | $C_I$ | 1632.93 | 97.08 |
| 275114 | 1 | $C_I$ | 1620.20 | 84.34 | 262791 | 1 | $C_I$ | 1632.94 | 97.08 |
| 265726 | 2 | $C_I$ | 1620.22 | 84.36 | 283392 | 1 | $C_I$ | 1632.94 | 97.08 |
| 282323 | 1 | $C_I$ | 1620.23 | 84.37 | 220342 | 2 | $C_I$ | 1632.94 | 97.08 |
| 285722 | 0 | $C_I$ | 1620.23 | 84.38 | 213580 | 2 | $C_I$ | 1632.95 | 97.09 |

|        |   |       |         |       |        |   |       |         |       |
|--------|---|-------|---------|-------|--------|---|-------|---------|-------|
| 285853 | 0 | $D_2$ | 1620.25 | 84.39 | 269024 | 2 | $C_1$ | 1632.95 | 97.10 |
| 213857 | 2 | $C_1$ | 1620.25 | 84.40 | 275439 | 2 | $C_1$ | 1632.95 | 97.10 |
| 284768 | 1 | $C_1$ | 1620.26 | 84.40 | 277163 | 2 | $C_1$ | 1632.96 | 97.10 |
| 281076 | 1 | $C_1$ | 1620.26 | 84.41 | 268083 | 2 | $C_1$ | 1632.96 | 97.11 |
| 231143 | 1 | $C_1$ | 1620.26 | 84.41 | 278495 | 2 | $C_1$ | 1632.96 | 97.11 |
| 213671 | 2 | $C_1$ | 1620.27 | 84.42 | 212135 | 2 | $C_1$ | 1632.96 | 97.11 |
| 273393 | 1 | $C_1$ | 1620.27 | 84.42 | 284761 | 2 | $C_1$ | 1632.97 | 97.11 |
| 285387 | 1 | $C_1$ | 1620.27 | 84.42 | 279757 | 1 | $C_1$ | 1632.97 | 97.12 |
| 276400 | 2 | $C_1$ | 1620.28 | 84.43 | 272653 | 2 | $C_1$ | 1632.97 | 97.12 |
| 283086 | 1 | $C_1$ | 1620.29 | 84.43 | 281353 | 1 | $C_1$ | 1632.98 | 97.12 |
| 276083 | 2 | $C_1$ | 1620.30 | 84.44 | 285761 | 0 | $C_1$ | 1632.98 | 97.12 |
| 285602 | 0 | $C_2$ | 1620.30 | 84.45 | 284953 | 1 | $C_1$ | 1632.98 | 97.13 |
| 285706 | 0 | $C_1$ | 1620.30 | 84.45 | 214889 | 2 | $C_1$ | 1632.99 | 97.13 |
| 212350 | 2 | $C_1$ | 1620.32 | 84.46 | 172393 | 2 | $C_1$ | 1632.99 | 97.13 |
| 284285 | 2 | $C_1$ | 1620.32 | 84.46 | 228407 | 2 | $C_1$ | 1632.99 | 97.14 |
| 246514 | 1 | $C_1$ | 1620.33 | 84.47 | 212514 | 2 | $C_1$ | 1632.99 | 97.14 |
| 285533 | 0 | $C_1$ | 1620.33 | 84.47 | 207582 | 2 | $C_1$ | 1632.99 | 97.14 |
| 283678 | 1 | $C_1$ | 1620.33 | 84.47 | 270957 | 2 | $C_1$ | 1633.00 | 97.14 |
| 285444 | 1 | $C_2$ | 1620.33 | 84.47 | 236670 | 2 | $C_1$ | 1633.00 | 97.15 |
| 285268 | 2 | $C_1$ | 1620.34 | 84.48 | 226733 | 2 | $C_1$ | 1633.01 | 97.15 |
| 282885 | 1 | $C_1$ | 1620.34 | 84.49 | 226354 | 1 | $C_1$ | 1633.02 | 97.16 |
| 278322 | 1 | $C_1$ | 1620.36 | 84.50 | 282548 | 2 | $C_1$ | 1633.02 | 97.16 |

|        |   |       |         |       |        |   |       |         |       |
|--------|---|-------|---------|-------|--------|---|-------|---------|-------|
| 203977 | 2 | $C_I$ | 1620.36 | 84.51 | 282078 | 2 | $C_I$ | 1633.02 | 97.16 |
| 203261 | 2 | $C_I$ | 1620.36 | 84.51 | 212290 | 2 | $C_I$ | 1633.02 | 97.17 |
| 284301 | 1 | $C_I$ | 1620.37 | 84.51 | 268708 | 2 | $C_I$ | 1633.04 | 97.18 |
| 280586 | 1 | $C_I$ | 1620.40 | 84.55 | 283783 | 1 | $C_I$ | 1633.04 | 97.19 |
| 213612 | 1 | $C_I$ | 1620.41 | 84.55 | 283047 | 1 | $C_I$ | 1633.05 | 97.19 |
| 285269 | 1 | $C_I$ | 1620.43 | 84.58 | 203701 | 2 | $C_I$ | 1633.07 | 97.22 |
| 211540 | 1 | $C_I$ | 1620.46 | 84.61 | 212470 | 2 | $C_I$ | 1633.08 | 97.22 |
| 265866 | 2 | $C_I$ | 1620.48 | 84.63 | 263749 | 2 | $C_I$ | 1633.08 | 97.23 |
| 269376 | 1 | $C_I$ | 1620.49 | 84.63 | 285707 | 0 | $C_s$ | 1633.09 | 97.23 |
| 252771 | 2 | $C_I$ | 1620.49 | 84.64 | 284928 | 2 | $C_I$ | 1633.09 | 97.24 |
| 284944 | 1 | $C_I$ | 1620.50 | 84.64 | 268935 | 2 | $C_I$ | 1633.10 | 97.24 |
| 266638 | 1 | $C_I$ | 1620.51 | 84.66 | 284212 | 2 | $C_I$ | 1633.10 | 97.25 |
| 269073 | 2 | $C_I$ | 1620.52 | 84.66 | 284200 | 2 | $C_I$ | 1633.11 | 97.25 |
| 252540 | 1 | $C_I$ | 1620.53 | 84.67 | 247133 | 2 | $C_I$ | 1633.11 | 97.26 |
| 248423 | 1 | $C_I$ | 1620.53 | 84.68 | 222739 | 2 | $C_I$ | 1633.12 | 97.26 |
| 265990 | 2 | $C_I$ | 1620.54 | 84.68 | 212193 | 2 | $C_I$ | 1633.13 | 97.27 |
| 282067 | 1 | $C_I$ | 1620.56 | 84.70 | 244038 | 1 | $C_I$ | 1633.13 | 97.27 |
| 252520 | 1 | $C_I$ | 1620.56 | 84.70 | 236086 | 2 | $C_I$ | 1633.13 | 97.28 |
| 232926 | 1 | $C_I$ | 1620.58 | 84.72 | 236011 | 2 | $C_I$ | 1633.13 | 97.28 |
| 285539 | 0 | $C_I$ | 1620.58 | 84.72 | 222906 | 1 | $C_I$ | 1633.15 | 97.29 |
| 229541 | 1 | $C_I$ | 1620.59 | 84.74 | 208324 | 1 | $C_I$ | 1633.15 | 97.30 |
| 285561 | 0 | $C_2$ | 1620.60 | 84.75 | 283763 | 1 | $C_I$ | 1633.15 | 97.30 |

|        |   |       |         |       |        |   |       |         |       |
|--------|---|-------|---------|-------|--------|---|-------|---------|-------|
| 228846 | 2 | $C_1$ | 1620.60 | 84.75 | 212225 | 2 | $C_1$ | 1633.16 | 97.30 |
| 252538 | 1 | $C_1$ | 1620.62 | 84.76 | 280485 | 2 | $C_1$ | 1633.16 | 97.30 |
| 283411 | 1 | $C_1$ | 1620.63 | 84.78 | 211297 | 1 | $C_1$ | 1633.16 | 97.31 |
| 207678 | 1 | $C_1$ | 1620.64 | 84.78 | 280799 | 1 | $C_1$ | 1633.17 | 97.31 |
| 263210 | 1 | $C_1$ | 1620.64 | 84.78 | 268726 | 1 | $C_1$ | 1633.17 | 97.32 |
| 281704 | 1 | $C_1$ | 1620.64 | 84.78 | 212900 | 2 | $C_1$ | 1633.19 | 97.33 |
| 282090 | 2 | $C_1$ | 1620.65 | 84.79 | 284024 | 1 | $C_2$ | 1633.19 | 97.33 |
| 285689 | 0 | $C_1$ | 1620.66 | 84.80 | 218886 | 1 | $C_1$ | 1633.19 | 97.33 |
| 212913 | 1 | $C_1$ | 1620.66 | 84.81 | 265942 | 2 | $C_1$ | 1633.19 | 97.34 |
| 266189 | 2 | $C_1$ | 1620.69 | 84.83 | 254917 | 2 | $C_1$ | 1633.21 | 97.35 |
| 273910 | 1 | $C_1$ | 1620.70 | 84.84 | 235999 | 2 | $C_1$ | 1633.21 | 97.35 |
| 212455 | 2 | $C_1$ | 1620.71 | 84.85 | 284617 | 1 | $C_1$ | 1633.21 | 97.36 |
| 284295 | 1 | $C_1$ | 1620.74 | 84.88 | 251797 | 2 | $C_1$ | 1633.21 | 97.36 |
| 283111 | 1 | $C_1$ | 1620.74 | 84.89 | 207194 | 2 | $C_1$ | 1633.23 | 97.37 |
| 281542 | 1 | $C_1$ | 1620.75 | 84.89 | 283390 | 2 | $C_1$ | 1633.23 | 97.38 |
| 285656 | 0 | $C_1$ | 1620.75 | 84.89 | 214199 | 2 | $C_1$ | 1633.24 | 97.38 |
| 285255 | 1 | $C_1$ | 1620.75 | 84.89 | 251817 | 2 | $C_1$ | 1633.25 | 97.39 |
| 275349 | 1 | $C_1$ | 1620.76 | 84.90 | 284194 | 2 | $C_1$ | 1633.25 | 97.39 |
| 262840 | 1 | $C_1$ | 1620.76 | 84.91 | 283628 | 2 | $C_1$ | 1633.25 | 97.39 |
| 282925 | 2 | $C_1$ | 1620.77 | 84.91 | 285177 | 1 | $C_1$ | 1633.25 | 97.40 |
| 214463 | 2 | $C_1$ | 1620.77 | 84.91 | 276239 | 1 | $C_1$ | 1633.26 | 97.41 |
| 283121 | 2 | $C_1$ | 1620.80 | 84.95 | 236006 | 2 | $C_1$ | 1633.26 | 97.41 |

|        |   |       |         |       |        |   |       |         |       |
|--------|---|-------|---------|-------|--------|---|-------|---------|-------|
| 266585 | 2 | $C_I$ | 1620.81 | 84.95 | 269042 | 2 | $C_I$ | 1633.27 | 97.41 |
| 284315 | 2 | $C_I$ | 1620.82 | 84.96 | 269107 | 1 | $C_I$ | 1633.27 | 97.42 |
| 250899 | 2 | $C_I$ | 1620.82 | 84.97 | 172392 | 2 | $C_I$ | 1633.27 | 97.42 |
| 285183 | 1 | $C_I$ | 1620.84 | 84.98 | 285554 | 0 | $C_I$ | 1633.28 | 97.42 |
| 268646 | 2 | $C_I$ | 1620.84 | 84.99 | 214951 | 2 | $C_I$ | 1633.28 | 97.43 |
| 271627 | 1 | $C_I$ | 1620.85 | 84.99 | 268522 | 2 | $C_I$ | 1633.28 | 97.43 |
| 251550 | 1 | $C_I$ | 1620.85 | 84.99 | 251231 | 2 | $C_I$ | 1633.28 | 97.43 |
| 274483 | 1 | $C_I$ | 1620.86 | 85.00 | 282075 | 2 | $C_I$ | 1633.28 | 97.43 |
| 285545 | 0 | $C_I$ | 1620.86 | 85.00 | 265796 | 2 | $C_I$ | 1633.30 | 97.44 |
| 284756 | 1 | $C_I$ | 1620.86 | 85.01 | 205216 | 2 | $C_I$ | 1633.30 | 97.44 |
| 252618 | 2 | $C_I$ | 1620.86 | 85.01 | 182185 | 2 | $C_I$ | 1633.31 | 97.46 |
| 243180 | 1 | $C_I$ | 1620.90 | 85.04 | 271172 | 2 | $C_I$ | 1633.32 | 97.46 |
| 274444 | 2 | $C_I$ | 1620.91 | 85.05 | 226523 | 2 | $C_I$ | 1633.32 | 97.46 |
| 198629 | 2 | $C_I$ | 1620.91 | 85.05 | 214459 | 2 | $C_I$ | 1633.32 | 97.46 |
| 275209 | 1 | $C_I$ | 1620.92 | 85.07 | 262483 | 1 | $C_I$ | 1633.33 | 97.47 |
| 276216 | 2 | $C_I$ | 1620.93 | 85.07 | 270900 | 2 | $C_I$ | 1633.33 | 97.47 |
| 266009 | 1 | $C_I$ | 1620.93 | 85.07 | 227110 | 2 | $C_I$ | 1633.33 | 97.48 |
| 206359 | 1 | $C_I$ | 1620.93 | 85.07 | 283104 | 2 | $C_I$ | 1633.33 | 97.48 |
| 284921 | 1 | $C_S$ | 1620.94 | 85.08 | 243171 | 2 | $C_I$ | 1633.34 | 97.48 |
| 266792 | 1 | $C_I$ | 1620.95 | 85.09 | 282106 | 1 | $C_I$ | 1633.35 | 97.49 |
| 273384 | 1 | $C_I$ | 1620.96 | 85.10 | 269111 | 1 | $C_I$ | 1633.35 | 97.49 |
| 235735 | 1 | $C_I$ | 1620.96 | 85.11 | 213309 | 2 | $C_I$ | 1633.35 | 97.50 |

|        |   |       |         |       |        |   |       |         |       |
|--------|---|-------|---------|-------|--------|---|-------|---------|-------|
| 285194 | 1 | $C_I$ | 1620.97 | 85.11 | 280484 | 1 | $C_I$ | 1633.35 | 97.50 |
| 252931 | 1 | $C_I$ | 1620.98 | 85.12 | 280800 | 2 | $C_I$ | 1633.35 | 97.50 |
| 277332 | 2 | $C_I$ | 1620.98 | 85.13 | 268635 | 2 | $C_I$ | 1633.36 | 97.50 |
| 223060 | 1 | $C_I$ | 1620.99 | 85.13 | 212407 | 2 | $C_I$ | 1633.36 | 97.51 |
| 226605 | 1 | $C_I$ | 1621.01 | 85.16 | 234842 | 1 | $C_I$ | 1633.36 | 97.51 |
| 275972 | 1 | $C_I$ | 1621.01 | 85.16 | 222914 | 2 | $C_I$ | 1633.37 | 97.51 |
| 281536 | 1 | $C_I$ | 1621.02 | 85.16 | 213858 | 2 | $C_I$ | 1633.38 | 97.53 |
| 285407 | 1 | $C_I$ | 1621.02 | 85.17 | 270874 | 2 | $C_I$ | 1633.38 | 97.53 |
| 280159 | 1 | $C_I$ | 1621.04 | 85.18 | 262365 | 2 | $C_I$ | 1633.38 | 97.53 |
| 270933 | 1 | $C_I$ | 1621.06 | 85.20 | 218900 | 1 | $C_S$ | 1633.39 | 97.53 |
| 283076 | 1 | $C_I$ | 1621.06 | 85.21 | 255654 | 2 | $C_I$ | 1633.39 | 97.53 |
| 281709 | 1 | $C_I$ | 1621.07 | 85.22 | 231681 | 1 | $C_I$ | 1633.39 | 97.54 |
| 270993 | 1 | $C_I$ | 1621.08 | 85.22 | 264279 | 2 | $C_I$ | 1633.39 | 97.54 |
| 227586 | 1 | $C_I$ | 1621.08 | 85.23 | 203440 | 2 | $C_I$ | 1633.40 | 97.54 |
| 277226 | 2 | $C_I$ | 1621.11 | 85.25 | 182240 | 2 | $C_I$ | 1633.40 | 97.54 |
| 285264 | 1 | $C_I$ | 1621.12 | 85.26 | 282752 | 2 | $C_I$ | 1633.40 | 97.54 |
| 235970 | 2 | $C_I$ | 1621.12 | 85.27 | 280945 | 2 | $C_I$ | 1633.40 | 97.55 |
| 250280 | 1 | $C_I$ | 1621.13 | 85.28 | 280924 | 2 | $C_I$ | 1633.40 | 97.55 |
| 253709 | 2 | $C_I$ | 1621.14 | 85.29 | 276615 | 1 | $C_I$ | 1633.41 | 97.55 |
| 267185 | 1 | $C_I$ | 1621.15 | 85.30 | 284020 | 2 | $C_I$ | 1633.41 | 97.55 |
| 252745 | 2 | $C_I$ | 1621.16 | 85.30 | 255660 | 2 | $C_I$ | 1633.41 | 97.56 |
| 283123 | 2 | $C_I$ | 1621.17 | 85.32 | 281940 | 2 | $C_I$ | 1633.41 | 97.56 |



|        |   |       |         |       |        |   |       |         |       |
|--------|---|-------|---------|-------|--------|---|-------|---------|-------|
| 284943 | 1 | $C_I$ | 1621.18 | 85.32 | 282631 | 2 | $C_I$ | 1633.41 | 97.56 |
| 278589 | 1 | $C_I$ | 1621.18 | 85.32 | 210877 | 2 | $C_I$ | 1633.42 | 97.56 |
| 205638 | 1 | $C_I$ | 1621.19 | 85.33 | 208282 | 2 | $C_I$ | 1633.42 | 97.56 |
| 213138 | 1 | $C_I$ | 1621.20 | 85.34 | 277295 | 2 | $C_I$ | 1633.42 | 97.57 |
| 282850 | 1 | $C_I$ | 1621.20 | 85.35 | 276261 | 2 | $C_I$ | 1633.42 | 97.57 |
| 265553 | 2 | $C_I$ | 1621.20 | 85.35 | 256553 | 2 | $C_I$ | 1633.43 | 97.58 |
| 271227 | 1 | $C_I$ | 1621.21 | 85.35 | 214048 | 2 | $C_I$ | 1633.44 | 97.58 |
| 283195 | 1 | $C_I$ | 1621.23 | 85.38 | 277378 | 2 | $C_I$ | 1633.45 | 97.59 |
| 253788 | 1 | $C_I$ | 1621.23 | 85.38 | 278505 | 1 | $C_I$ | 1633.45 | 97.60 |
| 180745 | 2 | $C_I$ | 1621.25 | 85.39 | 210951 | 1 | $C_I$ | 1633.47 | 97.61 |
| 262493 | 1 | $C_I$ | 1621.25 | 85.39 | 284896 | 1 | $C_I$ | 1633.47 | 97.61 |
| 235964 | 2 | $C_I$ | 1621.26 | 85.41 | 284314 | 1 | $C_I$ | 1633.47 | 97.62 |
| 266602 | 1 | $C_I$ | 1621.29 | 85.43 | 203242 | 1 | $C_I$ | 1633.48 | 97.63 |
| 210841 | 2 | $C_I$ | 1621.30 | 85.45 | 208817 | 2 | $C_I$ | 1633.50 | 97.64 |
| 278700 | 2 | $C_I$ | 1621.31 | 85.45 | 252451 | 2 | $C_I$ | 1633.50 | 97.64 |
| 211607 | 1 | $C_I$ | 1621.31 | 85.46 | 256089 | 2 | $C_I$ | 1633.50 | 97.64 |
| 282956 | 2 | $C_I$ | 1621.34 | 85.49 | 210834 | 2 | $C_I$ | 1633.50 | 97.65 |
| 266083 | 1 | $C_I$ | 1621.35 | 85.50 | 284935 | 2 | $C_I$ | 1633.50 | 97.65 |
| 284481 | 1 | $C_I$ | 1621.35 | 85.50 | 250278 | 1 | $C_I$ | 1633.51 | 97.65 |
| 215000 | 1 | $C_I$ | 1621.36 | 85.50 | 285550 | 0 | $C_I$ | 1633.51 | 97.66 |
| 285765 | 0 | $C_I$ | 1621.37 | 85.51 | 205615 | 2 | $C_I$ | 1633.51 | 97.66 |
| 282107 | 1 | $C_I$ | 1621.37 | 85.52 | 239895 | 2 | $C_I$ | 1633.52 | 97.66 |

|        |   |       |         |       |        |   |       |         |       |
|--------|---|-------|---------|-------|--------|---|-------|---------|-------|
| 266737 | 1 | $C_I$ | 1621.38 | 85.53 | 251644 | 1 | $C_I$ | 1633.52 | 97.67 |
| 179596 | 2 | $C_I$ | 1621.39 | 85.53 | 219988 | 2 | $C_I$ | 1633.52 | 97.67 |
| 265980 | 2 | $C_I$ | 1621.39 | 85.54 | 252779 | 2 | $C_I$ | 1633.53 | 97.67 |
| 269065 | 2 | $C_I$ | 1621.40 | 85.54 | 172333 | 2 | $C_I$ | 1633.54 | 97.68 |
| 266191 | 2 | $C_I$ | 1621.40 | 85.54 | 239966 | 2 | $C_I$ | 1633.54 | 97.69 |
| 205208 | 1 | $C_I$ | 1621.40 | 85.55 | 254113 | 2 | $C_I$ | 1633.54 | 97.69 |
| 277236 | 2 | $C_I$ | 1621.41 | 85.55 | 182297 | 2 | $C_I$ | 1633.55 | 97.69 |
| 273908 | 1 | $C_I$ | 1621.43 | 85.57 | 213410 | 2 | $C_I$ | 1633.55 | 97.70 |
| 285594 | 0 | $C_I$ | 1621.43 | 85.58 | 263180 | 2 | $C_I$ | 1633.55 | 97.70 |
| 212399 | 2 | $C_I$ | 1621.46 | 85.61 | 216449 | 2 | $C_I$ | 1633.55 | 97.70 |
| 276923 | 2 | $C_I$ | 1621.46 | 85.61 | 254313 | 2 | $C_I$ | 1633.56 | 97.70 |
| 247245 | 2 | $C_I$ | 1621.47 | 85.62 | 284977 | 1 | $C_I$ | 1633.56 | 97.70 |
| 285197 | 1 | $C_I$ | 1621.47 | 85.62 | 262814 | 1 | $C_I$ | 1633.56 | 97.70 |
| 269195 | 2 | $C_I$ | 1621.48 | 85.63 | 205212 | 2 | $C_I$ | 1633.56 | 97.70 |
| 253682 | 1 | $C_I$ | 1621.48 | 85.63 | 281516 | 2 | $C_I$ | 1633.57 | 97.71 |
| 266504 | 1 | $C_I$ | 1621.49 | 85.63 | 277582 | 2 | $C_I$ | 1633.57 | 97.71 |
| 250866 | 1 | $C_I$ | 1621.49 | 85.63 | 283009 | 2 | $C_I$ | 1633.57 | 97.71 |
| 271184 | 1 | $C_I$ | 1621.50 | 85.64 | 207560 | 1 | $C_I$ | 1633.57 | 97.71 |
| 237425 | 1 | $C_I$ | 1621.50 | 85.65 | 254704 | 2 | $C_I$ | 1633.57 | 97.72 |
| 275817 | 2 | $C_I$ | 1621.52 | 85.67 | 213207 | 2 | $C_I$ | 1633.57 | 97.72 |
| 281352 | 1 | $C_I$ | 1621.52 | 85.67 | 275685 | 2 | $C_I$ | 1633.58 | 97.72 |
| 275161 | 1 | $C_I$ | 1621.54 | 85.68 | 226522 | 2 | $C_I$ | 1633.58 | 97.72 |

|        |   |       |         |       |        |   |       |         |       |
|--------|---|-------|---------|-------|--------|---|-------|---------|-------|
| 265547 | 2 | $C_I$ | 1621.54 | 85.69 | 120344 | 2 | $C_I$ | 1633.58 | 97.73 |
| 235992 | 2 | $C_I$ | 1621.57 | 85.72 | 162371 | 2 | $C_I$ | 1633.59 | 97.73 |
| 285372 | 1 | $C_I$ | 1621.57 | 85.72 | 280052 | 2 | $C_I$ | 1633.59 | 97.74 |
| 143565 | 2 | $C_I$ | 1621.58 | 85.72 | 214277 | 2 | $C_I$ | 1633.59 | 97.74 |
| 282328 | 2 | $C_I$ | 1621.58 | 85.72 | 236688 | 2 | $C_I$ | 1633.60 | 97.74 |
| 278692 | 1 | $C_I$ | 1621.58 | 85.72 | 265153 | 2 | $C_I$ | 1633.60 | 97.75 |
| 203268 | 1 | $C_I$ | 1621.59 | 85.74 | 284951 | 2 | $C_I$ | 1633.61 | 97.75 |
| 284719 | 1 | $C_I$ | 1621.59 | 85.74 | 227510 | 2 | $C_I$ | 1633.61 | 97.76 |
| 250885 | 2 | $C_I$ | 1621.60 | 85.75 | 270842 | 2 | $C_I$ | 1633.61 | 97.76 |
| 278538 | 1 | $C_I$ | 1621.60 | 85.75 | 277790 | 2 | $C_I$ | 1633.62 | 97.76 |
| 269228 | 2 | $C_I$ | 1621.61 | 85.76 | 285663 | 0 | $C_I$ | 1633.62 | 97.76 |
| 282005 | 2 | $C_I$ | 1621.62 | 85.77 | 262717 | 2 | $C_I$ | 1633.62 | 97.76 |
| 207195 | 2 | $C_I$ | 1621.62 | 85.77 | 276401 | 1 | $C_I$ | 1633.62 | 97.76 |
| 269407 | 2 | $C_I$ | 1621.62 | 85.77 | 222737 | 2 | $C_I$ | 1633.62 | 97.77 |
| 249495 | 2 | $C_I$ | 1621.63 | 85.77 | 269972 | 2 | $C_I$ | 1633.63 | 97.77 |
| 265944 | 2 | $C_I$ | 1621.63 | 85.77 | 252951 | 2 | $C_I$ | 1633.64 | 97.78 |
| 284565 | 2 | $C_I$ | 1621.63 | 85.78 | 264443 | 2 | $C_I$ | 1633.64 | 97.78 |
| 270825 | 2 | $C_I$ | 1621.64 | 85.78 | 277770 | 2 | $C_I$ | 1633.64 | 97.79 |
| 243218 | 2 | $C_I$ | 1621.65 | 85.79 | 262142 | 2 | $C_I$ | 1633.65 | 97.79 |
| 213778 | 1 | $C_I$ | 1621.65 | 85.80 | 279072 | 2 | $C_I$ | 1633.65 | 97.80 |
| 269451 | 1 | $C_I$ | 1621.66 | 85.80 | 284488 | 1 | $C_I$ | 1633.67 | 97.81 |
| 242759 | 1 | $C_I$ | 1621.66 | 85.80 | 236337 | 2 | $C_I$ | 1633.68 | 97.82 |

|        |   |       |         |       |        |   |       |         |       |
|--------|---|-------|---------|-------|--------|---|-------|---------|-------|
| 275151 | 1 | $C_1$ | 1621.66 | 85.81 | 212184 | 1 | $C_1$ | 1633.68 | 97.82 |
| 282361 | 1 | $C_1$ | 1621.69 | 85.84 | 202961 | 2 | $C_1$ | 1633.68 | 97.83 |
| 284780 | 1 | $C_1$ | 1621.70 | 85.85 | 265752 | 2 | $C_1$ | 1633.69 | 97.83 |
| 255771 | 1 | $C_1$ | 1621.70 | 85.85 | 251778 | 2 | $C_1$ | 1633.69 | 97.83 |
| 284911 | 1 | $C_1$ | 1621.71 | 85.85 | 266515 | 2 | $C_1$ | 1633.69 | 97.83 |
| 214711 | 1 | $C_1$ | 1621.71 | 85.86 | 263079 | 1 | $C_1$ | 1633.69 | 97.84 |
| 203235 | 1 | $C_1$ | 1621.72 | 85.86 | 269453 | 2 | $C_1$ | 1633.69 | 97.84 |
| 187661 | 2 | $C_1$ | 1621.72 | 85.86 | 277269 | 2 | $C_1$ | 1633.69 | 97.84 |
| 250868 | 2 | $C_1$ | 1621.72 | 85.87 | 247211 | 2 | $C_1$ | 1633.69 | 97.84 |
| 239272 | 1 | $C_1$ | 1621.73 | 85.87 | 226744 | 2 | $C_1$ | 1633.70 | 97.84 |
| 236567 | 2 | $C_1$ | 1621.73 | 85.88 | 212070 | 2 | $C_1$ | 1633.70 | 97.84 |
| 264250 | 1 | $C_1$ | 1621.73 | 85.88 | 282011 | 2 | $C_1$ | 1633.70 | 97.85 |
| 212085 | 2 | $C_1$ | 1621.75 | 85.89 | 268114 | 2 | $C_1$ | 1633.70 | 97.85 |
| 268658 | 2 | $C_1$ | 1621.75 | 85.90 | 273414 | 2 | $C_1$ | 1633.70 | 97.85 |
| 262977 | 2 | $C_1$ | 1621.75 | 85.90 | 275983 | 2 | $C_1$ | 1633.71 | 97.85 |
| 284760 | 1 | $C_1$ | 1621.75 | 85.90 | 265844 | 2 | $C_1$ | 1633.71 | 97.85 |
| 270530 | 1 | $C_1$ | 1621.76 | 85.90 | 213856 | 2 | $C_1$ | 1633.71 | 97.86 |
| 207289 | 2 | $C_1$ | 1621.76 | 85.90 | 243776 | 2 | $C_1$ | 1633.71 | 97.86 |
| 283097 | 2 | $C_1$ | 1621.77 | 85.91 | 285769 | 0 | $C_1$ | 1633.71 | 97.86 |
| 283400 | 1 | $C_1$ | 1621.77 | 85.91 | 239856 | 2 | $C_1$ | 1633.72 | 97.86 |
| 282579 | 1 | $C_1$ | 1621.77 | 85.92 | 251952 | 2 | $C_1$ | 1633.72 | 97.86 |
| 283891 | 1 | $C_2$ | 1621.78 | 85.93 | 215629 | 1 | $C_1$ | 1633.72 | 97.86 |

|        |   |       |         |       |        |   |       |         |       |
|--------|---|-------|---------|-------|--------|---|-------|---------|-------|
| 251167 | 1 | $C_I$ | 1621.78 | 85.93 | 235984 | 2 | $C_I$ | 1633.72 | 97.86 |
| 285223 | 1 | $C_I$ | 1621.78 | 85.93 | 268636 | 2 | $C_I$ | 1633.72 | 97.87 |
| 266038 | 2 | $C_I$ | 1621.80 | 85.94 | 276091 | 2 | $C_I$ | 1633.72 | 97.87 |
| 213616 | 2 | $C_I$ | 1621.81 | 85.95 | 243179 | 2 | $C_I$ | 1633.73 | 97.87 |
| 266016 | 1 | $C_I$ | 1621.82 | 85.97 | 236828 | 2 | $C_I$ | 1633.73 | 97.88 |
| 284271 | 1 | $C_I$ | 1621.83 | 85.97 | 264952 | 2 | $C_I$ | 1633.73 | 97.88 |
| 250992 | 2 | $C_I$ | 1621.84 | 85.98 | 279775 | 1 | $C_I$ | 1633.73 | 97.88 |
| 253120 | 2 | $C_I$ | 1621.86 | 86.01 | 284513 | 1 | $C_I$ | 1633.74 | 97.89 |
| 285779 | 0 | $C_I$ | 1621.87 | 86.01 | 262395 | 2 | $C_I$ | 1633.74 | 97.89 |
| 214857 | 1 | $C_I$ | 1621.88 | 86.03 | 283134 | 2 | $C_I$ | 1633.74 | 97.89 |
| 280189 | 1 | $C_I$ | 1621.89 | 86.03 | 212611 | 2 | $C_I$ | 1633.75 | 97.89 |
| 266601 | 1 | $C_I$ | 1621.89 | 86.04 | 212395 | 2 | $C_I$ | 1633.75 | 97.90 |
| 282040 | 2 | $C_I$ | 1621.90 | 86.04 | 203476 | 2 | $C_I$ | 1633.76 | 97.90 |
| 284217 | 2 | $C_I$ | 1621.91 | 86.06 | 277757 | 2 | $C_I$ | 1633.76 | 97.90 |
| 281310 | 1 | $C_I$ | 1621.91 | 86.06 | 206942 | 2 | $C_I$ | 1633.76 | 97.91 |
| 231377 | 1 | $C_I$ | 1621.92 | 86.06 | 277409 | 2 | $C_I$ | 1633.77 | 97.91 |
| 268687 | 2 | $C_I$ | 1621.94 | 86.09 | 276020 | 2 | $C_I$ | 1633.78 | 97.92 |
| 213657 | 2 | $C_I$ | 1621.95 | 86.10 | 284489 | 1 | $C_I$ | 1633.78 | 97.92 |
| 284359 | 1 | $C_I$ | 1621.98 | 86.13 | 268494 | 2 | $C_I$ | 1633.78 | 97.92 |
| 282737 | 2 | $C_I$ | 1621.98 | 86.13 | 197339 | 2 | $C_I$ | 1633.78 | 97.92 |
| 265755 | 2 | $C_I$ | 1621.98 | 86.13 | 219965 | 2 | $C_I$ | 1633.78 | 97.93 |
| 275452 | 2 | $C_I$ | 1621.99 | 86.13 | 265771 | 2 | $C_I$ | 1633.79 | 97.93 |

|        |   |       |         |       |        |   |       |         |       |
|--------|---|-------|---------|-------|--------|---|-------|---------|-------|
| 252519 | 1 | $C_I$ | 1621.99 | 86.14 | 253177 | 2 | $C_I$ | 1633.80 | 97.94 |
| 214076 | 2 | $C_I$ | 1622.00 | 86.14 | 242721 | 2 | $C_I$ | 1633.80 | 97.94 |
| 281580 | 2 | $C_I$ | 1622.00 | 86.15 | 282102 | 2 | $C_I$ | 1633.80 | 97.94 |
| 285702 | 0 | $C_I$ | 1622.00 | 86.15 | 203629 | 2 | $C_I$ | 1633.80 | 97.95 |
| 251173 | 1 | $C_I$ | 1622.01 | 86.15 | 282374 | 2 | $C_I$ | 1633.81 | 97.95 |
| 282369 | 1 | $C_I$ | 1622.01 | 86.16 | 285746 | 0 | $C_I$ | 1633.81 | 97.96 |
| 252873 | 2 | $C_I$ | 1622.03 | 86.17 | 282694 | 2 | $C_I$ | 1633.82 | 97.96 |
| 256872 | 1 | $C_I$ | 1622.03 | 86.17 | 173823 | 2 | $C_I$ | 1633.82 | 97.96 |
| 281686 | 2 | $C_I$ | 1622.03 | 86.18 | 276098 | 2 | $C_I$ | 1633.82 | 97.97 |
| 285302 | 1 | $C_I$ | 1622.04 | 86.18 | 270866 | 2 | $C_I$ | 1633.82 | 97.97 |
| 229577 | 2 | $C_I$ | 1622.04 | 86.19 | 285438 | 2 | $C_I$ | 1633.82 | 97.97 |
| 243034 | 2 | $C_I$ | 1622.06 | 86.20 | 252484 | 2 | $C_I$ | 1633.83 | 97.97 |
| 274692 | 2 | $C_I$ | 1622.06 | 86.21 | 252895 | 1 | $C_I$ | 1633.83 | 97.97 |
| 270873 | 1 | $C_I$ | 1622.07 | 86.22 | 277370 | 2 | $C_I$ | 1633.83 | 97.98 |
| 282758 | 2 | $C_I$ | 1622.08 | 86.22 | 280771 | 1 | $C_I$ | 1633.84 | 97.99 |
| 270486 | 1 | $C_I$ | 1622.08 | 86.23 | 285102 | 1 | $C_I$ | 1633.84 | 97.99 |
| 285449 | 2 | $C_I$ | 1622.08 | 86.23 | 278320 | 2 | $C_I$ | 1633.84 | 97.99 |
| 226444 | 2 | $C_I$ | 1622.09 | 86.24 | 236320 | 2 | $C_I$ | 1633.84 | 97.99 |
| 275696 | 2 | $C_I$ | 1622.11 | 86.26 | 284955 | 2 | $C_I$ | 1633.85 | 97.99 |
| 282256 | 2 | $C_I$ | 1622.15 | 86.30 | 284265 | 1 | $C_I$ | 1633.85 | 97.99 |
| 207056 | 1 | $C_I$ | 1622.16 | 86.31 | 256194 | 2 | $C_I$ | 1633.85 | 98.00 |
| 274806 | 2 | $C_I$ | 1622.17 | 86.32 | 268573 | 2 | $C_I$ | 1633.85 | 98.00 |

|        |   |       |         |       |        |   |       |         |       |
|--------|---|-------|---------|-------|--------|---|-------|---------|-------|
| 265549 | 2 | $C_I$ | 1622.18 | 86.33 | 278663 | 2 | $C_I$ | 1633.86 | 98.01 |
| 281883 | 2 | $C_I$ | 1622.22 | 86.36 | 236549 | 2 | $C_I$ | 1633.87 | 98.01 |
| 276051 | 2 | $C_I$ | 1622.22 | 86.37 | 227488 | 2 | $C_I$ | 1633.87 | 98.02 |
| 226692 | 2 | $C_I$ | 1622.23 | 86.37 | 253706 | 2 | $C_I$ | 1633.87 | 98.02 |
| 282818 | 1 | $C_I$ | 1622.23 | 86.38 | 271183 | 2 | $C_I$ | 1633.88 | 98.02 |
| 273993 | 1 | $C_I$ | 1622.23 | 86.38 | 237416 | 1 | $C_I$ | 1633.89 | 98.03 |
| 276593 | 1 | $C_I$ | 1622.23 | 86.38 | 236070 | 2 | $C_I$ | 1633.90 | 98.04 |
| 278781 | 1 | $C_I$ | 1622.24 | 86.38 | 285507 | 0 | $C_I$ | 1633.90 | 98.04 |
| 252722 | 1 | $C_I$ | 1622.24 | 86.39 | 213974 | 2 | $C_I$ | 1633.91 | 98.05 |
| 276118 | 2 | $C_I$ | 1622.25 | 86.39 | 282986 | 1 | $C_I$ | 1633.91 | 98.06 |
| 270643 | 1 | $C_I$ | 1622.25 | 86.39 | 223495 | 1 | $C_I$ | 1633.93 | 98.07 |
| 282546 | 2 | $C_I$ | 1622.25 | 86.40 | 236432 | 2 | $C_I$ | 1633.93 | 98.08 |
| 283326 | 2 | $C_I$ | 1622.26 | 86.41 | 280502 | 1 | $C_I$ | 1633.94 | 98.08 |
| 228431 | 1 | $C_I$ | 1622.27 | 86.42 | 212896 | 2 | $C_I$ | 1633.94 | 98.08 |
| 248363 | 1 | $C_I$ | 1622.27 | 86.42 | 251637 | 1 | $C_I$ | 1633.94 | 98.09 |
| 239901 | 1 | $C_I$ | 1622.29 | 86.44 | 275330 | 1 | $C_I$ | 1633.94 | 98.09 |
| 284291 | 2 | $C_I$ | 1622.30 | 86.45 | 237456 | 2 | $C_I$ | 1633.95 | 98.09 |
| 270529 | 1 | $C_I$ | 1622.30 | 86.45 | 203972 | 2 | $C_I$ | 1633.96 | 98.11 |
| 226388 | 2 | $C_I$ | 1622.31 | 86.46 | 195794 | 2 | $C_I$ | 1633.97 | 98.11 |
| 207059 | 1 | $C_I$ | 1622.34 | 86.49 | 277325 | 2 | $C_I$ | 1633.98 | 98.12 |
| 216247 | 2 | $C_I$ | 1622.35 | 86.49 | 234703 | 2 | $C_I$ | 1633.98 | 98.12 |
| 263338 | 2 | $C_I$ | 1622.36 | 86.51 | 236422 | 2 | $C_I$ | 1633.98 | 98.13 |

|        |   |       |         |       |        |   |       |         |       |
|--------|---|-------|---------|-------|--------|---|-------|---------|-------|
| 267417 | 1 | $C_1$ | 1622.37 | 86.52 | 252694 | 2 | $C_1$ | 1633.99 | 98.13 |
| 212152 | 1 | $C_1$ | 1622.40 | 86.54 | 215557 | 2 | $C_1$ | 1634.00 | 98.15 |
| 252922 | 1 | $C_1$ | 1622.41 | 86.56 | 269399 | 2 | $C_1$ | 1634.00 | 98.15 |
| 264239 | 1 | $C_1$ | 1622.42 | 86.56 | 275324 | 2 | $C_1$ | 1634.01 | 98.15 |
| 284817 | 1 | $C_1$ | 1622.42 | 86.57 | 265827 | 2 | $C_1$ | 1634.01 | 98.16 |
| 282947 | 2 | $C_1$ | 1622.42 | 86.57 | 269039 | 2 | $C_1$ | 1634.02 | 98.16 |
| 266048 | 2 | $C_1$ | 1622.44 | 86.59 | 253583 | 2 | $C_1$ | 1634.02 | 98.16 |
| 231151 | 2 | $C_1$ | 1622.44 | 86.59 | 278631 | 1 | $C_1$ | 1634.02 | 98.16 |
| 213137 | 1 | $C_1$ | 1622.44 | 86.59 | 285221 | 1 | $C_1$ | 1634.03 | 98.17 |
| 279772 | 1 | $C_1$ | 1622.45 | 86.59 | 268608 | 2 | $C_1$ | 1634.03 | 98.17 |
| 247257 | 1 | $C_1$ | 1622.46 | 86.60 | 254033 | 2 | $C_1$ | 1634.03 | 98.18 |
| 282815 | 1 | $C_1$ | 1622.46 | 86.61 | 227881 | 2 | $C_1$ | 1634.03 | 98.18 |
| 212295 | 2 | $C_1$ | 1622.48 | 86.63 | 283978 | 1 | $C_1$ | 1634.03 | 98.18 |
| 270645 | 1 | $C_1$ | 1622.50 | 86.64 | 269692 | 2 | $C_1$ | 1634.05 | 98.19 |
| 214046 | 2 | $C_1$ | 1622.50 | 86.65 | 282448 | 1 | $C_1$ | 1634.05 | 98.20 |
| 270952 | 1 | $C_1$ | 1622.52 | 86.66 | 284876 | 2 | $C_1$ | 1634.06 | 98.20 |
| 252546 | 2 | $C_1$ | 1622.52 | 86.67 | 280084 | 2 | $C_1$ | 1634.06 | 98.20 |
| 252942 | 1 | $C_1$ | 1622.53 | 86.68 | 263136 | 1 | $C_1$ | 1634.07 | 98.22 |
| 214296 | 1 | $C_1$ | 1622.54 | 86.69 | 273922 | 1 | $C_1$ | 1634.07 | 98.22 |
| 214291 | 1 | $C_1$ | 1622.56 | 86.70 | 276682 | 2 | $C_1$ | 1634.09 | 98.23 |
| 252712 | 1 | $C_1$ | 1622.57 | 86.71 | 262378 | 2 | $C_1$ | 1634.09 | 98.23 |
| 283269 | 2 | $C_1$ | 1622.57 | 86.72 | 237445 | 2 | $C_1$ | 1634.09 | 98.23 |



|        |   |       |         |       |        |   |       |         |       |
|--------|---|-------|---------|-------|--------|---|-------|---------|-------|
| 255777 | 2 | $C_I$ | 1622.57 | 86.72 | 161547 | 2 | $C_I$ | 1634.09 | 98.23 |
| 262489 | 1 | $C_I$ | 1622.57 | 86.72 | 214799 | 1 | $C_I$ | 1634.09 | 98.24 |
| 265567 | 2 | $C_I$ | 1622.58 | 86.73 | 231254 | 2 | $C_I$ | 1634.09 | 98.24 |
| 260152 | 2 | $C_I$ | 1622.59 | 86.73 | 283396 | 1 | $C_I$ | 1634.10 | 98.24 |
| 267183 | 2 | $C_I$ | 1622.60 | 86.74 | 251237 | 2 | $C_I$ | 1634.10 | 98.25 |
| 252791 | 1 | $C_I$ | 1622.60 | 86.74 | 284201 | 2 | $C_I$ | 1634.10 | 98.25 |
| 191611 | 2 | $C_I$ | 1622.61 | 86.76 | 282110 | 2 | $C_I$ | 1634.11 | 98.26 |
| 213577 | 2 | $C_I$ | 1622.62 | 86.77 | 283190 | 2 | $C_I$ | 1634.12 | 98.26 |
| 212733 | 2 | $C_I$ | 1622.62 | 86.77 | 284929 | 2 | $C_I$ | 1634.12 | 98.27 |
| 226598 | 2 | $C_I$ | 1622.62 | 86.77 | 214397 | 1 | $C_I$ | 1634.12 | 98.27 |
| 265666 | 2 | $C_I$ | 1622.64 | 86.78 | 237417 | 1 | $C_I$ | 1634.13 | 98.27 |
| 282443 | 1 | $C_I$ | 1622.64 | 86.79 | 257769 | 1 | $C_I$ | 1634.13 | 98.27 |
| 263092 | 1 | $C_I$ | 1622.65 | 86.79 | 262943 | 2 | $C_I$ | 1634.13 | 98.28 |
| 267203 | 1 | $C_I$ | 1622.65 | 86.80 | 274750 | 2 | $C_I$ | 1634.14 | 98.28 |
| 250630 | 2 | $C_I$ | 1622.66 | 86.81 | 280919 | 2 | $C_I$ | 1634.14 | 98.29 |
| 276236 | 2 | $C_I$ | 1622.66 | 86.81 | 228287 | 2 | $C_I$ | 1634.15 | 98.29 |
| 236028 | 2 | $C_I$ | 1622.67 | 86.81 | 269221 | 2 | $C_I$ | 1634.15 | 98.30 |
| 284404 | 2 | $C_I$ | 1622.67 | 86.82 | 266359 | 2 | $C_I$ | 1634.15 | 98.30 |
| 285601 | 0 | $C_I$ | 1622.68 | 86.82 | 229324 | 1 | $C_I$ | 1634.16 | 98.30 |
| 284758 | 2 | $C_I$ | 1622.68 | 86.83 | 268283 | 2 | $C_I$ | 1634.16 | 98.31 |
| 276282 | 1 | $C_I$ | 1622.69 | 86.83 | 268551 | 1 | $C_I$ | 1634.16 | 98.31 |
| 283014 | 1 | $C_I$ | 1622.69 | 86.84 | 235020 | 1 | $C_I$ | 1634.17 | 98.31 |

|        |   |       |         |       |        |   |       |         |       |
|--------|---|-------|---------|-------|--------|---|-------|---------|-------|
| 175204 | 2 | $C_1$ | 1622.69 | 86.84 | 270414 | 1 | $C_1$ | 1634.17 | 98.32 |
| 252521 | 1 | $C_1$ | 1622.70 | 86.85 | 236634 | 2 | $C_1$ | 1634.17 | 98.32 |
| 215034 | 1 | $C_1$ | 1622.71 | 86.85 | 214779 | 1 | $C_1$ | 1634.17 | 98.32 |
| 273998 | 1 | $C_1$ | 1622.71 | 86.86 | 216268 | 2 | $C_1$ | 1634.17 | 98.32 |
| 278907 | 1 | $C_1$ | 1622.71 | 86.86 | 282080 | 2 | $C_1$ | 1634.18 | 98.33 |
| 252826 | 1 | $C_1$ | 1622.72 | 86.86 | 248378 | 2 | $C_1$ | 1634.18 | 98.33 |
| 283575 | 2 | $C_1$ | 1622.72 | 86.87 | 284812 | 1 | $C_1$ | 1634.18 | 98.33 |
| 276134 | 2 | $C_1$ | 1622.73 | 86.87 | 270437 | 2 | $C_1$ | 1634.19 | 98.33 |
| 277224 | 2 | $C_1$ | 1622.73 | 86.87 | 251337 | 2 | $C_1$ | 1634.19 | 98.33 |
| 285243 | 1 | $C_1$ | 1622.73 | 86.88 | 213691 | 2 | $C_1$ | 1634.19 | 98.33 |
| 285395 | 1 | $C_1$ | 1622.74 | 86.88 | 268662 | 2 | $C_1$ | 1634.19 | 98.33 |
| 266017 | 1 | $C_1$ | 1622.76 | 86.90 | 213635 | 2 | $C_1$ | 1634.20 | 98.34 |
| 272403 | 1 | $C_1$ | 1622.76 | 86.90 | 213855 | 2 | $C_1$ | 1634.20 | 98.34 |
| 280403 | 2 | $C_1$ | 1622.77 | 86.91 | 280481 | 2 | $C_1$ | 1634.20 | 98.34 |
| 171217 | 2 | $C_1$ | 1622.77 | 86.91 | 269736 | 1 | $C_1$ | 1634.20 | 98.34 |
| 283507 | 2 | $C_1$ | 1622.78 | 86.92 | 214770 | 1 | $C_1$ | 1634.20 | 98.35 |
| 214953 | 1 | $C_1$ | 1622.78 | 86.93 | 215817 | 1 | $C_1$ | 1634.20 | 98.35 |
| 277750 | 1 | $C_1$ | 1622.78 | 86.93 | 252904 | 1 | $C_1$ | 1634.21 | 98.36 |
| 277355 | 1 | $C_1$ | 1622.80 | 86.94 | 277263 | 1 | $C_1$ | 1634.21 | 98.36 |
| 223059 | 1 | $C_1$ | 1622.80 | 86.94 | 212532 | 2 | $C_1$ | 1634.22 | 98.37 |
| 212029 | 2 | $C_1$ | 1622.81 | 86.96 | 270960 | 2 | $C_1$ | 1634.23 | 98.38 |
| 276076 | 2 | $C_1$ | 1622.82 | 86.97 | 266782 | 1 | $C_1$ | 1634.24 | 98.38 |

|        |   |       |         |       |        |   |       |         |       |
|--------|---|-------|---------|-------|--------|---|-------|---------|-------|
| 285448 | 2 | $C_I$ | 1622.83 | 86.98 | 210914 | 2 | $C_I$ | 1634.24 | 98.39 |
| 237606 | 1 | $C_I$ | 1622.83 | 86.98 | 268671 | 2 | $C_I$ | 1634.24 | 98.39 |
| 272493 | 1 | $C_I$ | 1622.85 | 86.99 | 276641 | 2 | $C_I$ | 1634.24 | 98.39 |
| 249911 | 1 | $C_I$ | 1622.85 | 86.99 | 228430 | 1 | $C_I$ | 1634.25 | 98.39 |
| 285206 | 2 | $C_I$ | 1622.86 | 87.01 | 203430 | 1 | $C_I$ | 1634.25 | 98.40 |
| 214295 | 1 | $C_I$ | 1622.87 | 87.01 | 268538 | 2 | $C_I$ | 1634.26 | 98.41 |
| 282572 | 1 | $C_I$ | 1622.89 | 87.03 | 268701 | 2 | $C_I$ | 1634.27 | 98.42 |
| 276445 | 2 | $C_I$ | 1622.90 | 87.04 | 223062 | 1 | $C_I$ | 1634.28 | 98.42 |
| 285251 | 2 | $C_I$ | 1622.91 | 87.05 | 203630 | 2 | $C_I$ | 1634.28 | 98.42 |
| 243186 | 1 | $C_I$ | 1622.92 | 87.06 | 270991 | 2 | $C_I$ | 1634.28 | 98.43 |
| 265570 | 2 | $C_I$ | 1622.93 | 87.08 | 240435 | 2 | $C_I$ | 1634.29 | 98.43 |
| 226526 | 1 | $C_I$ | 1622.94 | 87.08 | 256551 | 2 | $C_I$ | 1634.30 | 98.44 |
| 226805 | 1 | $C_I$ | 1622.95 | 87.09 | 270105 | 2 | $C_I$ | 1634.30 | 98.45 |
| 284857 | 1 | $C_I$ | 1622.96 | 87.11 | 282437 | 2 | $C_I$ | 1634.31 | 98.46 |
| 237426 | 1 | $C_I$ | 1622.96 | 87.11 | 284627 | 1 | $C_I$ | 1634.31 | 98.46 |
| 252754 | 1 | $C_I$ | 1622.97 | 87.12 | 254206 | 2 | $C_I$ | 1634.32 | 98.46 |
| 247638 | 2 | $C_I$ | 1622.98 | 87.13 | 269744 | 2 | $C_I$ | 1634.32 | 98.47 |
| 268442 | 2 | $C_I$ | 1622.99 | 87.13 | 269188 | 2 | $C_I$ | 1634.32 | 98.47 |
| 269105 | 1 | $C_I$ | 1622.99 | 87.14 | 278324 | 1 | $C_I$ | 1634.33 | 98.47 |
| 237423 | 1 | $C_I$ | 1623.00 | 87.15 | 277282 | 2 | $C_I$ | 1634.33 | 98.48 |
| 282533 | 2 | $C_I$ | 1623.01 | 87.16 | 256776 | 2 | $C_I$ | 1634.34 | 98.49 |
| 274719 | 1 | $C_I$ | 1623.02 | 87.16 | 226928 | 1 | $C_I$ | 1634.34 | 98.49 |

|        |   |       |         |       |        |   |       |         |       |
|--------|---|-------|---------|-------|--------|---|-------|---------|-------|
| 276178 | 1 | $C_1$ | 1623.02 | 87.17 | 282481 | 2 | $C_1$ | 1634.35 | 98.50 |
| 283435 | 1 | $C_1$ | 1623.03 | 87.17 | 274470 | 1 | $C_1$ | 1634.35 | 98.50 |
| 285520 | 0 | $C_1$ | 1623.03 | 87.18 | 219978 | 1 | $C_1$ | 1634.35 | 98.50 |
| 273749 | 1 | $C_1$ | 1623.03 | 87.18 | 256635 | 2 | $C_1$ | 1634.36 | 98.50 |
| 278717 | 2 | $C_1$ | 1623.05 | 87.19 | 282428 | 1 | $C_1$ | 1634.36 | 98.50 |
| 231874 | 1 | $C_1$ | 1623.05 | 87.20 | 240312 | 2 | $C_1$ | 1634.37 | 98.51 |
| 212516 | 2 | $C_1$ | 1623.06 | 87.20 | 247248 | 1 | $C_1$ | 1634.37 | 98.51 |
| 252930 | 1 | $C_1$ | 1623.06 | 87.21 | 285479 | 0 | $C_2$ | 1634.37 | 98.51 |
| 268663 | 2 | $C_1$ | 1623.08 | 87.23 | 255823 | 2 | $C_1$ | 1634.37 | 98.51 |
| 282346 | 2 | $C_1$ | 1623.09 | 87.24 | 277860 | 1 | $C_1$ | 1634.37 | 98.51 |
| 236494 | 2 | $C_1$ | 1623.10 | 87.24 | 139423 | 2 | $C_1$ | 1634.37 | 98.52 |
| 226758 | 2 | $C_1$ | 1623.10 | 87.25 | 214251 | 2 | $C_1$ | 1634.37 | 98.52 |
| 243780 | 1 | $C_1$ | 1623.11 | 87.26 | 266745 | 1 | $C_1$ | 1634.38 | 98.52 |
| 266188 | 2 | $C_1$ | 1623.12 | 87.27 | 262941 | 2 | $C_1$ | 1634.38 | 98.52 |
| 213128 | 2 | $C_1$ | 1623.13 | 87.28 | 247126 | 2 | $C_1$ | 1634.38 | 98.52 |
| 265860 | 1 | $C_1$ | 1623.13 | 87.28 | 255782 | 2 | $C_1$ | 1634.38 | 98.53 |
| 285617 | 0 | $C_1$ | 1623.15 | 87.29 | 285440 | 1 | $C_1$ | 1634.38 | 98.53 |
| 242663 | 1 | $C_1$ | 1623.15 | 87.30 | 276120 | 2 | $C_1$ | 1634.40 | 98.55 |
| 205207 | 1 | $C_1$ | 1623.15 | 87.30 | 282977 | 2 | $C_1$ | 1634.40 | 98.55 |
| 277070 | 2 | $C_1$ | 1623.16 | 87.31 | 277090 | 2 | $C_1$ | 1634.41 | 98.56 |
| 268463 | 2 | $C_1$ | 1623.17 | 87.32 | 180799 | 2 | $C_1$ | 1634.42 | 98.56 |
| 269949 | 1 | $C_1$ | 1623.17 | 87.32 | 282803 | 2 | $C_1$ | 1634.42 | 98.56 |

|        |   |       |         |       |        |   |       |         |       |
|--------|---|-------|---------|-------|--------|---|-------|---------|-------|
| 252934 | 1 | $C_1$ | 1623.17 | 87.32 | 277173 | 2 | $C_1$ | 1634.42 | 98.56 |
| 273909 | 1 | $C_1$ | 1623.21 | 87.35 | 213058 | 2 | $C_1$ | 1634.42 | 98.57 |
| 253630 | 1 | $C_1$ | 1623.21 | 87.35 | 179549 | 2 | $C_1$ | 1634.43 | 98.57 |
| 275160 | 2 | $C_1$ | 1623.21 | 87.35 | 231291 | 2 | $C_1$ | 1634.43 | 98.57 |
| 268878 | 2 | $C_1$ | 1623.22 | 87.36 | 207899 | 1 | $C_1$ | 1634.43 | 98.57 |
| 276587 | 2 | $C_1$ | 1623.23 | 87.37 | 212914 | 2 | $C_1$ | 1634.43 | 98.57 |
| 277369 | 2 | $C_1$ | 1623.23 | 87.37 | 274474 | 2 | $C_1$ | 1634.44 | 98.58 |
| 282547 | 2 | $C_1$ | 1623.23 | 87.37 | 267194 | 2 | $C_1$ | 1634.45 | 98.59 |
| 276611 | 1 | $C_1$ | 1623.23 | 87.38 | 274549 | 1 | $C_1$ | 1634.45 | 98.60 |
| 276107 | 2 | $C_1$ | 1623.24 | 87.39 | 262420 | 2 | $C_1$ | 1634.45 | 98.60 |
| 281553 | 2 | $C_1$ | 1623.24 | 87.39 | 269474 | 2 | $C_1$ | 1634.46 | 98.60 |
| 223613 | 1 | $C_1$ | 1623.25 | 87.39 | 239197 | 2 | $C_1$ | 1634.46 | 98.60 |
| 282812 | 1 | $C_1$ | 1623.25 | 87.40 | 276127 | 2 | $C_1$ | 1634.46 | 98.61 |
| 284228 | 2 | $C_1$ | 1623.26 | 87.41 | 227733 | 1 | $C_1$ | 1634.46 | 98.61 |
| 275931 | 2 | $C_1$ | 1623.27 | 87.42 | 243175 | 2 | $C_1$ | 1634.47 | 98.61 |
| 285484 | 0 | $C_1$ | 1623.28 | 87.43 | 239273 | 2 | $C_1$ | 1634.47 | 98.61 |
| 269454 | 1 | $C_1$ | 1623.30 | 87.45 | 262997 | 1 | $C_1$ | 1634.47 | 98.62 |
| 276595 | 2 | $C_1$ | 1623.31 | 87.46 | 275463 | 1 | $C_1$ | 1634.48 | 98.62 |
| 268472 | 2 | $C_1$ | 1623.34 | 87.48 | 206346 | 1 | $C_1$ | 1634.48 | 98.62 |
| 280829 | 1 | $C_1$ | 1623.34 | 87.49 | 208010 | 2 | $C_1$ | 1634.48 | 98.62 |
| 284305 | 1 | $C_1$ | 1623.35 | 87.49 | 283067 | 2 | $C_1$ | 1634.48 | 98.62 |
| 236035 | 2 | $C_1$ | 1623.35 | 87.50 | 152527 | 2 | $C_1$ | 1634.48 | 98.63 |

|        |   |          |         |       |        |   |       |         |       |
|--------|---|----------|---------|-------|--------|---|-------|---------|-------|
| 285851 | 0 | $C_s$    | 1623.36 | 87.50 | 216008 | 2 | $C_I$ | 1634.48 | 98.63 |
| 203262 | 2 | $C_I$    | 1623.36 | 87.50 | 252497 | 2 | $C_I$ | 1634.48 | 98.63 |
| 269748 | 2 | $C_I$    | 1623.38 | 87.53 | 265676 | 1 | $C_I$ | 1634.49 | 98.63 |
| 265793 | 2 | $C_I$    | 1623.39 | 87.53 | 283094 | 1 | $C_I$ | 1634.49 | 98.63 |
| 282536 | 2 | $C_I$    | 1623.39 | 87.53 | 266497 | 2 | $C_I$ | 1634.49 | 98.64 |
| 281583 | 1 | $C_I$    | 1623.39 | 87.54 | 273989 | 1 | $C_I$ | 1634.49 | 98.64 |
| 262947 | 1 | $C_I$    | 1623.41 | 87.56 | 213147 | 2 | $C_I$ | 1634.50 | 98.64 |
| 283211 | 1 | $C_I$    | 1623.41 | 87.56 | 242640 | 2 | $C_I$ | 1634.50 | 98.64 |
| 282819 | 1 | $C_I$    | 1623.41 | 87.56 | 216417 | 2 | $C_I$ | 1634.50 | 98.64 |
| 207204 | 2 | $C_I$    | 1623.42 | 87.56 | 227452 | 2 | $C_I$ | 1634.50 | 98.65 |
| 284366 | 1 | $C_I$    | 1623.42 | 87.57 | 258741 | 2 | $C_I$ | 1634.50 | 98.65 |
| 281619 | 2 | $C_I$    | 1623.43 | 87.57 | 285730 | 0 | $C_I$ | 1634.50 | 98.65 |
| 284922 | 1 | $C_s$    | 1623.43 | 87.57 | 285509 | 0 | $C_I$ | 1634.51 | 98.65 |
| 252790 | 2 | $C_I$    | 1623.43 | 87.57 | 243795 | 2 | $C_I$ | 1634.51 | 98.65 |
| 215854 | 1 | $C_I$    | 1623.44 | 87.58 | 232116 | 1 | $C_I$ | 1634.51 | 98.65 |
| 273276 | 1 | $C_I$    | 1623.44 | 87.59 | 273477 | 1 | $C_I$ | 1634.51 | 98.66 |
| 235201 | 1 | $C_I$    | 1623.45 | 87.59 | 284786 | 2 | $C_I$ | 1634.52 | 98.66 |
| 284027 | 1 | $C_{2v}$ | 1623.46 | 87.61 | 266786 | 2 | $C_I$ | 1634.52 | 98.66 |
| 254028 | 1 | $C_I$    | 1623.46 | 87.61 | 273600 | 2 | $C_I$ | 1634.52 | 98.66 |
| 284398 | 2 | $C_I$    | 1623.47 | 87.61 | 214126 | 1 | $C_I$ | 1634.52 | 98.67 |
| 282312 | 2 | $C_I$    | 1623.48 | 87.62 | 255785 | 2 | $C_I$ | 1634.53 | 98.67 |
| 284849 | 1 | $C_I$    | 1623.48 | 87.63 | 244258 | 2 | $C_I$ | 1634.53 | 98.67 |

|        |   |       |         |       |        |   |       |         |       |
|--------|---|-------|---------|-------|--------|---|-------|---------|-------|
| 277717 | 2 | $C_I$ | 1623.48 | 87.63 | 212908 | 2 | $C_I$ | 1634.53 | 98.67 |
| 222918 | 1 | $C_I$ | 1623.48 | 87.63 | 278711 | 2 | $C_I$ | 1634.53 | 98.68 |
| 262915 | 1 | $C_I$ | 1623.48 | 87.63 | 228472 | 1 | $C_I$ | 1634.54 | 98.68 |
| 223830 | 1 | $C_I$ | 1623.49 | 87.63 | 283011 | 1 | $C_I$ | 1634.54 | 98.69 |
| 275650 | 1 | $C_I$ | 1623.49 | 87.64 | 210967 | 2 | $C_I$ | 1634.55 | 98.70 |
| 284353 | 2 | $C_I$ | 1623.50 | 87.64 | 271733 | 2 | $C_I$ | 1634.55 | 98.70 |
| 281319 | 1 | $C_I$ | 1623.50 | 87.64 | 279658 | 1 | $C_I$ | 1634.56 | 98.70 |
| 281040 | 1 | $C_S$ | 1623.50 | 87.65 | 279017 | 1 | $C_I$ | 1634.56 | 98.70 |
| 284634 | 1 | $C_I$ | 1623.50 | 87.65 | 285659 | 0 | $C_I$ | 1634.56 | 98.70 |
| 272710 | 1 | $C_I$ | 1623.51 | 87.65 | 227404 | 2 | $C_I$ | 1634.58 | 98.72 |
| 285624 | 0 | $C_I$ | 1623.51 | 87.66 | 269754 | 2 | $C_I$ | 1634.58 | 98.72 |
| 227538 | 2 | $C_I$ | 1623.51 | 87.66 | 269954 | 2 | $C_I$ | 1634.58 | 98.73 |
| 265592 | 2 | $C_I$ | 1623.51 | 87.66 | 275168 | 2 | $C_I$ | 1634.58 | 98.73 |
| 275861 | 1 | $C_I$ | 1623.52 | 87.66 | 234810 | 2 | $C_I$ | 1634.60 | 98.74 |
| 207042 | 2 | $C_I$ | 1623.52 | 87.66 | 253175 | 2 | $C_I$ | 1634.60 | 98.74 |
| 268695 | 2 | $C_I$ | 1623.53 | 87.67 | 263111 | 1 | $C_I$ | 1634.61 | 98.75 |
| 220221 | 1 | $C_I$ | 1623.55 | 87.70 | 284286 | 2 | $C_I$ | 1634.61 | 98.75 |
| 254293 | 1 | $C_I$ | 1623.56 | 87.70 | 280098 | 1 | $C_I$ | 1634.61 | 98.75 |
| 203255 | 2 | $C_I$ | 1623.56 | 87.71 | 227732 | 1 | $C_I$ | 1634.61 | 98.76 |
| 251771 | 2 | $C_I$ | 1623.58 | 87.72 | 214242 | 2 | $C_I$ | 1634.61 | 98.76 |
| 268545 | 2 | $C_I$ | 1623.58 | 87.72 | 252769 | 2 | $C_I$ | 1634.62 | 98.76 |
| 276510 | 2 | $C_I$ | 1623.59 | 87.73 | 212580 | 2 | $C_I$ | 1634.62 | 98.77 |

|        |   |       |         |       |        |   |       |         |       |
|--------|---|-------|---------|-------|--------|---|-------|---------|-------|
| 223935 | 1 | $C_1$ | 1623.60 | 87.74 | 212531 | 2 | $C_1$ | 1634.62 | 98.77 |
| 282865 | 1 | $C_1$ | 1623.62 | 87.77 | 262773 | 2 | $C_1$ | 1634.63 | 98.78 |
| 284919 | 2 | $C_1$ | 1623.63 | 87.77 | 239342 | 2 | $C_1$ | 1634.65 | 98.79 |
| 273371 | 1 | $C_1$ | 1623.66 | 87.80 | 213232 | 2 | $C_1$ | 1634.65 | 98.79 |
| 240309 | 2 | $C_1$ | 1623.66 | 87.80 | 203674 | 2 | $C_1$ | 1634.65 | 98.80 |
| 236308 | 2 | $C_1$ | 1623.67 | 87.81 | 281653 | 1 | $C_1$ | 1634.66 | 98.80 |
| 282307 | 2 | $C_1$ | 1623.68 | 87.83 | 227561 | 2 | $C_1$ | 1634.66 | 98.81 |
| 278662 | 1 | $C_1$ | 1623.69 | 87.83 | 285650 | 0 | $C_1$ | 1634.67 | 98.81 |
| 270985 | 1 | $C_1$ | 1623.69 | 87.84 | 256015 | 2 | $C_1$ | 1634.67 | 98.82 |
| 268508 | 2 | $C_1$ | 1623.69 | 87.84 | 269037 | 2 | $C_1$ | 1634.68 | 98.82 |
| 285143 | 1 | $C_1$ | 1623.69 | 87.84 | 256507 | 2 | $C_1$ | 1634.68 | 98.83 |
| 276522 | 1 | $C_1$ | 1623.71 | 87.85 | 253785 | 1 | $C_1$ | 1634.69 | 98.84 |
| 214990 | 1 | $C_1$ | 1623.71 | 87.85 | 282093 | 2 | $C_1$ | 1634.69 | 98.84 |
| 267845 | 2 | $C_1$ | 1623.71 | 87.86 | 212753 | 1 | $C_1$ | 1634.70 | 98.84 |
| 278261 | 1 | $C_1$ | 1623.72 | 87.86 | 278927 | 2 | $C_1$ | 1634.70 | 98.84 |
| 266507 | 2 | $C_1$ | 1623.73 | 87.87 | 285560 | 0 | $C_1$ | 1634.70 | 98.84 |
| 276918 | 1 | $C_1$ | 1623.74 | 87.89 | 285855 | 0 | $C_2$ | 1634.71 | 98.85 |
| 216578 | 2 | $C_1$ | 1623.76 | 87.91 | 276415 | 1 | $C_1$ | 1634.71 | 98.86 |
| 253114 | 1 | $C_1$ | 1623.76 | 87.91 | 222361 | 2 | $C_1$ | 1634.72 | 98.86 |
| 211464 | 2 | $C_1$ | 1623.77 | 87.91 | 212579 | 2 | $C_1$ | 1634.72 | 98.86 |
| 256110 | 1 | $C_1$ | 1623.78 | 87.93 | 236662 | 2 | $C_1$ | 1634.72 | 98.86 |
| 187857 | 2 | $C_1$ | 1623.78 | 87.93 | 252861 | 2 | $C_1$ | 1634.73 | 98.87 |



|        |   |       |         |       |        |   |       |         |       |
|--------|---|-------|---------|-------|--------|---|-------|---------|-------|
| 265552 | 2 | $C_I$ | 1623.80 | 87.94 | 212803 | 2 | $C_I$ | 1634.73 | 98.87 |
| 280650 | 1 | $C_I$ | 1623.80 | 87.94 | 213615 | 2 | $C_I$ | 1634.73 | 98.87 |
| 282598 | 1 | $C_I$ | 1623.80 | 87.94 | 188531 | 2 | $C_I$ | 1634.73 | 98.88 |
| 285830 | 0 | $C_I$ | 1623.81 | 87.96 | 284889 | 1 | $C_I$ | 1634.73 | 98.88 |
| 285472 | 0 | $C_I$ | 1623.82 | 87.96 | 252495 | 2 | $C_I$ | 1634.74 | 98.88 |
| 263553 | 1 | $C_I$ | 1623.82 | 87.96 | 213584 | 2 | $C_I$ | 1634.74 | 98.89 |
| 237186 | 1 | $C_I$ | 1623.84 | 87.98 | 237120 | 2 | $C_I$ | 1634.74 | 98.89 |
| 204624 | 1 | $C_I$ | 1623.84 | 87.99 | 207355 | 2 | $C_I$ | 1634.76 | 98.90 |
| 269220 | 2 | $C_I$ | 1623.85 | 88.00 | 278491 | 2 | $C_I$ | 1634.76 | 98.91 |
| 285214 | 1 | $C_I$ | 1623.86 | 88.01 | 276226 | 1 | $C_I$ | 1634.77 | 98.92 |
| 227511 | 1 | $C_I$ | 1623.86 | 88.01 | 248372 | 1 | $C_I$ | 1634.77 | 98.92 |
| 250321 | 1 | $C_I$ | 1623.87 | 88.01 | 265083 | 2 | $C_I$ | 1634.78 | 98.92 |
| 265772 | 2 | $C_I$ | 1623.87 | 88.01 | 273375 | 1 | $C_I$ | 1634.78 | 98.93 |
| 237193 | 1 | $C_I$ | 1623.89 | 88.03 | 263723 | 2 | $C_I$ | 1634.78 | 98.93 |
| 227316 | 2 | $C_I$ | 1623.89 | 88.03 | 284840 | 2 | $C_I$ | 1634.79 | 98.93 |
| 281317 | 1 | $C_I$ | 1623.89 | 88.04 | 267012 | 2 | $C_I$ | 1634.79 | 98.94 |
| 266036 | 2 | $C_I$ | 1623.92 | 88.07 | 273907 | 1 | $C_I$ | 1634.79 | 98.94 |
| 251004 | 2 | $C_I$ | 1623.93 | 88.07 | 280212 | 1 | $C_I$ | 1634.79 | 98.94 |
| 285147 | 2 | $C_I$ | 1623.93 | 88.07 | 254120 | 2 | $C_I$ | 1634.79 | 98.94 |
| 273274 | 1 | $C_I$ | 1623.93 | 88.08 | 191616 | 2 | $C_I$ | 1634.80 | 98.95 |
| 279773 | 1 | $C_I$ | 1623.94 | 88.08 | 212548 | 2 | $C_I$ | 1634.81 | 98.95 |
| 276379 | 2 | $C_I$ | 1623.94 | 88.09 | 280768 | 1 | $C_I$ | 1634.82 | 98.96 |

|        |   |       |         |       |        |   |       |         |       |
|--------|---|-------|---------|-------|--------|---|-------|---------|-------|
| 269648 | 2 | $C_I$ | 1623.95 | 88.10 | 207168 | 2 | $C_I$ | 1634.82 | 98.97 |
| 252741 | 1 | $C_I$ | 1623.96 | 88.10 | 278634 | 2 | $C_I$ | 1634.82 | 98.97 |
| 223831 | 1 | $C_I$ | 1623.97 | 88.11 | 270531 | 2 | $C_I$ | 1634.84 | 98.98 |
| 273745 | 2 | $C_I$ | 1623.98 | 88.12 | 284451 | 2 | $C_I$ | 1634.84 | 98.98 |
| 270637 | 1 | $C_I$ | 1623.99 | 88.14 | 284240 | 2 | $C_I$ | 1634.84 | 98.99 |
| 203664 | 1 | $C_I$ | 1623.99 | 88.14 | 207901 | 2 | $C_I$ | 1634.84 | 98.99 |
| 227399 | 2 | $C_I$ | 1624.01 | 88.15 | 253119 | 2 | $C_I$ | 1634.85 | 99.00 |
| 285739 | 0 | $C_I$ | 1624.01 | 88.16 | 282086 | 2 | $C_I$ | 1634.85 | 99.00 |
| 277059 | 2 | $C_I$ | 1624.02 | 88.16 | 182213 | 2 | $C_I$ | 1634.86 | 99.01 |
| 282921 | 2 | $C_I$ | 1624.03 | 88.17 | 269933 | 1 | $C_I$ | 1634.86 | 99.01 |
| 256663 | 2 | $C_I$ | 1624.04 | 88.18 | 281059 | 1 | $C_I$ | 1634.87 | 99.02 |
| 231130 | 1 | $C_I$ | 1624.04 | 88.19 | 192525 | 2 | $C_I$ | 1634.88 | 99.02 |
| 247115 | 1 | $C_I$ | 1624.05 | 88.19 | 284685 | 1 | $C_I$ | 1634.88 | 99.02 |
| 278860 | 1 | $C_I$ | 1624.06 | 88.20 | 227663 | 1 | $C_I$ | 1634.88 | 99.03 |
| 203968 | 2 | $C_I$ | 1624.07 | 88.21 | 254082 | 1 | $C_I$ | 1634.89 | 99.03 |
| 248029 | 1 | $C_I$ | 1624.07 | 88.21 | 265409 | 2 | $C_I$ | 1634.89 | 99.03 |
| 246377 | 1 | $C_I$ | 1624.07 | 88.21 | 232706 | 1 | $C_I$ | 1634.89 | 99.04 |
| 285351 | 2 | $C_I$ | 1624.07 | 88.22 | 275202 | 1 | $C_I$ | 1634.89 | 99.04 |
| 285245 | 1 | $C_I$ | 1624.09 | 88.23 | 247689 | 1 | $C_I$ | 1634.90 | 99.05 |
| 281562 | 2 | $C_I$ | 1624.09 | 88.24 | 285021 | 2 | $C_I$ | 1634.92 | 99.07 |
| 285764 | 0 | $C_I$ | 1624.10 | 88.24 | 205625 | 1 | $C_I$ | 1634.93 | 99.07 |
| 274727 | 1 | $C_I$ | 1624.11 | 88.25 | 252545 | 2 | $C_I$ | 1634.93 | 99.08 |

|        |   |       |         |       |        |   |       |         |       |
|--------|---|-------|---------|-------|--------|---|-------|---------|-------|
| 274792 | 2 | $C_1$ | 1624.11 | 88.25 | 243791 | 2 | $C_1$ | 1634.94 | 99.09 |
| 215045 | 2 | $C_1$ | 1624.13 | 88.27 | 227506 | 2 | $C_1$ | 1634.94 | 99.09 |
| 280796 | 1 | $C_1$ | 1624.13 | 88.28 | 227666 | 1 | $C_1$ | 1634.94 | 99.09 |
| 283131 | 2 | $C_1$ | 1624.13 | 88.28 | 273893 | 1 | $C_1$ | 1634.94 | 99.09 |
| 270829 | 2 | $C_1$ | 1624.13 | 88.28 | 223513 | 2 | $C_1$ | 1634.95 | 99.10 |
| 274790 | 2 | $C_1$ | 1624.13 | 88.28 | 274807 | 2 | $C_1$ | 1634.95 | 99.10 |
| 213110 | 2 | $C_1$ | 1624.14 | 88.28 | 269355 | 2 | $C_1$ | 1634.95 | 99.10 |
| 248451 | 1 | $C_1$ | 1624.14 | 88.29 | 212535 | 2 | $C_1$ | 1634.95 | 99.10 |
| 278877 | 1 | $C_1$ | 1624.14 | 88.29 | 275472 | 2 | $C_1$ | 1634.95 | 99.10 |
| 265020 | 2 | $C_1$ | 1624.15 | 88.30 | 267529 | 2 | $C_1$ | 1634.96 | 99.10 |
| 275476 | 2 | $C_1$ | 1624.15 | 88.30 | 223534 | 2 | $C_1$ | 1634.96 | 99.10 |
| 205620 | 1 | $C_1$ | 1624.17 | 88.31 | 273385 | 1 | $C_1$ | 1634.96 | 99.10 |
| 269778 | 2 | $C_1$ | 1624.17 | 88.31 | 207173 | 2 | $C_1$ | 1634.96 | 99.10 |
| 269075 | 2 | $C_1$ | 1624.17 | 88.32 | 235147 | 2 | $C_1$ | 1634.96 | 99.10 |
| 283217 | 2 | $C_1$ | 1624.19 | 88.33 | 193184 | 2 | $C_1$ | 1634.97 | 99.11 |
| 281705 | 1 | $C_1$ | 1624.19 | 88.34 | 227691 | 1 | $C_1$ | 1634.97 | 99.11 |
| 276078 | 2 | $C_1$ | 1624.20 | 88.34 | 236033 | 2 | $C_1$ | 1634.97 | 99.12 |
| 212292 | 2 | $C_1$ | 1624.20 | 88.35 | 282413 | 2 | $C_1$ | 1634.98 | 99.12 |
| 250910 | 2 | $C_1$ | 1624.21 | 88.35 | 210836 | 2 | $C_1$ | 1634.98 | 99.13 |
| 235029 | 1 | $C_1$ | 1624.21 | 88.36 | 254586 | 2 | $C_1$ | 1634.98 | 99.13 |
| 212078 | 2 | $C_1$ | 1624.22 | 88.37 | 207029 | 2 | $C_1$ | 1634.98 | 99.13 |
| 205621 | 2 | $C_1$ | 1624.23 | 88.37 | 274477 | 2 | $C_1$ | 1634.99 | 99.13 |

|        |   |       |         |       |        |   |       |         |       |
|--------|---|-------|---------|-------|--------|---|-------|---------|-------|
| 285007 | 1 | $C_I$ | 1624.23 | 88.37 | 239897 | 2 | $C_I$ | 1634.99 | 99.13 |
| 271140 | 2 | $C_I$ | 1624.23 | 88.38 | 216519 | 2 | $C_I$ | 1634.99 | 99.13 |
| 251236 | 2 | $C_I$ | 1624.24 | 88.38 | 265991 | 2 | $C_I$ | 1634.99 | 99.13 |
| 280434 | 2 | $C_I$ | 1624.24 | 88.39 | 188538 | 2 | $C_I$ | 1634.99 | 99.14 |
| 210962 | 2 | $C_I$ | 1624.26 | 88.40 | 255781 | 2 | $C_I$ | 1635.00 | 99.14 |
| 269720 | 1 | $C_I$ | 1624.27 | 88.42 | 285496 | 0 | $C_I$ | 1635.00 | 99.14 |
| 236104 | 2 | $C_I$ | 1624.27 | 88.42 | 272909 | 1 | $C_I$ | 1635.00 | 99.15 |
| 250857 | 1 | $C_I$ | 1624.28 | 88.43 | 223180 | 2 | $C_I$ | 1635.00 | 99.15 |
| 284368 | 1 | $C_I$ | 1624.29 | 88.43 | 285334 | 1 | $C_I$ | 1635.00 | 99.15 |
| 280442 | 2 | $C_I$ | 1624.30 | 88.44 | 266813 | 2 | $C_I$ | 1635.00 | 99.15 |
| 253781 | 2 | $C_I$ | 1624.32 | 88.47 | 247325 | 2 | $C_I$ | 1635.01 | 99.16 |
| 216450 | 2 | $C_I$ | 1624.32 | 88.47 | 265686 | 2 | $C_I$ | 1635.01 | 99.16 |
| 285260 | 1 | $C_I$ | 1624.32 | 88.47 | 275432 | 2 | $C_I$ | 1635.03 | 99.17 |
| 226311 | 2 | $C_I$ | 1624.34 | 88.48 | 191620 | 2 | $C_I$ | 1635.03 | 99.18 |
| 278843 | 1 | $C_I$ | 1624.34 | 88.49 | 274440 | 2 | $C_I$ | 1635.03 | 99.18 |
| 254047 | 2 | $C_I$ | 1624.36 | 88.51 | 262916 | 2 | $C_I$ | 1635.04 | 99.18 |
| 262965 | 2 | $C_I$ | 1624.36 | 88.51 | 262488 | 1 | $C_I$ | 1635.04 | 99.19 |
| 277085 | 2 | $C_I$ | 1624.37 | 88.52 | 205102 | 2 | $C_I$ | 1635.05 | 99.19 |
| 253627 | 1 | $C_I$ | 1624.37 | 88.52 | 251012 | 2 | $C_I$ | 1635.05 | 99.19 |
| 276354 | 1 | $C_I$ | 1624.38 | 88.52 | 227687 | 1 | $C_I$ | 1635.05 | 99.20 |
| 268544 | 2 | $C_I$ | 1624.40 | 88.55 | 280712 | 1 | $C_I$ | 1635.06 | 99.20 |
| 236041 | 2 | $C_I$ | 1624.41 | 88.56 | 223154 | 2 | $C_I$ | 1635.07 | 99.21 |

|        |   |       |         |       |        |   |       |         |       |
|--------|---|-------|---------|-------|--------|---|-------|---------|-------|
| 282410 | 2 | $C_I$ | 1624.41 | 88.56 | 251596 | 2 | $C_I$ | 1635.07 | 99.21 |
| 266574 | 2 | $C_I$ | 1624.43 | 88.57 | 274055 | 2 | $C_I$ | 1635.07 | 99.22 |
| 226383 | 1 | $C_I$ | 1624.43 | 88.58 | 265995 | 2 | $C_I$ | 1635.07 | 99.22 |
| 214292 | 1 | $C_I$ | 1624.44 | 88.59 | 258034 | 2 | $C_I$ | 1635.07 | 99.22 |
| 285179 | 1 | $C_I$ | 1624.44 | 88.59 | 212283 | 2 | $C_I$ | 1635.07 | 99.22 |
| 268440 | 1 | $C_I$ | 1624.44 | 88.59 | 236192 | 2 | $C_I$ | 1635.08 | 99.22 |
| 280653 | 1 | $C_I$ | 1624.46 | 88.60 | 282461 | 2 | $C_I$ | 1635.08 | 99.22 |
| 240204 | 1 | $C_I$ | 1624.46 | 88.60 | 237187 | 1 | $C_I$ | 1635.08 | 99.23 |
| 281554 | 2 | $C_I$ | 1624.48 | 88.62 | 214935 | 2 | $C_I$ | 1635.08 | 99.23 |
| 237561 | 1 | $C_I$ | 1624.48 | 88.62 | 268600 | 1 | $C_I$ | 1635.09 | 99.23 |
| 285188 | 1 | $C_I$ | 1624.48 | 88.63 | 252960 | 2 | $C_I$ | 1635.09 | 99.23 |
| 213149 | 1 | $C_I$ | 1624.49 | 88.63 | 247763 | 1 | $C_I$ | 1635.09 | 99.24 |
| 275130 | 2 | $C_I$ | 1624.49 | 88.63 | 231938 | 2 | $C_I$ | 1635.10 | 99.24 |
| 207205 | 2 | $C_I$ | 1624.49 | 88.64 | 253268 | 2 | $C_I$ | 1635.10 | 99.24 |
| 253783 | 1 | $C_I$ | 1624.49 | 88.64 | 277711 | 2 | $C_I$ | 1635.10 | 99.24 |
| 251045 | 2 | $C_I$ | 1624.51 | 88.65 | 281426 | 2 | $C_I$ | 1635.10 | 99.25 |
| 252606 | 2 | $C_I$ | 1624.51 | 88.65 | 284689 | 1 | $C_I$ | 1635.10 | 99.25 |
| 285152 | 1 | $C_I$ | 1624.52 | 88.67 | 266765 | 2 | $C_I$ | 1635.11 | 99.25 |
| 268461 | 2 | $C_I$ | 1624.53 | 88.67 | 179559 | 2 | $C_I$ | 1635.11 | 99.25 |
| 285210 | 1 | $C_I$ | 1624.53 | 88.68 | 212105 | 2 | $C_I$ | 1635.12 | 99.26 |
| 284514 | 1 | $C_I$ | 1624.55 | 88.69 | 281654 | 2 | $C_I$ | 1635.13 | 99.27 |
| 250901 | 1 | $C_I$ | 1624.56 | 88.71 | 213658 | 2 | $C_I$ | 1635.13 | 99.27 |

|        |   |       |         |       |        |   |       |         |       |
|--------|---|-------|---------|-------|--------|---|-------|---------|-------|
| 236425 | 1 | $C_1$ | 1624.57 | 88.71 | 239349 | 1 | $C_1$ | 1635.14 | 99.28 |
| 204593 | 2 | $C_1$ | 1624.58 | 88.72 | 151257 | 2 | $C_1$ | 1635.15 | 99.29 |
| 284859 | 1 | $C_1$ | 1624.58 | 88.72 | 252535 | 1 | $C_1$ | 1635.15 | 99.29 |
| 251953 | 2 | $C_1$ | 1624.59 | 88.73 | 232059 | 1 | $C_1$ | 1635.15 | 99.30 |
| 283127 | 2 | $C_1$ | 1624.59 | 88.73 | 269292 | 2 | $C_1$ | 1635.15 | 99.30 |
| 252805 | 1 | $C_1$ | 1624.59 | 88.73 | 254907 | 2 | $C_1$ | 1635.15 | 99.30 |
| 283133 | 1 | $C_1$ | 1624.59 | 88.73 | 284848 | 2 | $C_1$ | 1635.15 | 99.30 |
| 250853 | 2 | $C_1$ | 1624.59 | 88.74 | 212351 | 2 | $C_1$ | 1635.15 | 99.30 |
| 282367 | 2 | $C_1$ | 1624.60 | 88.75 | 282736 | 2 | $C_1$ | 1635.16 | 99.31 |
| 274022 | 2 | $C_1$ | 1624.60 | 88.75 | 265557 | 2 | $C_1$ | 1635.16 | 99.31 |
| 280670 | 1 | $C_1$ | 1624.61 | 88.75 | 282433 | 1 | $C_1$ | 1635.16 | 99.31 |
| 283920 | 1 | $C_1$ | 1624.62 | 88.77 | 232212 | 2 | $C_1$ | 1635.17 | 99.31 |
| 262934 | 2 | $C_1$ | 1624.64 | 88.78 | 274475 | 2 | $C_1$ | 1635.17 | 99.32 |
| 281584 | 2 | $C_1$ | 1624.65 | 88.79 | 248382 | 1 | $C_1$ | 1635.18 | 99.33 |
| 219527 | 2 | $C_1$ | 1624.66 | 88.80 | 253692 | 2 | $C_1$ | 1635.19 | 99.33 |
| 274826 | 2 | $C_1$ | 1624.66 | 88.81 | 276978 | 1 | $C_1$ | 1635.19 | 99.33 |
| 275480 | 2 | $C_1$ | 1624.67 | 88.81 | 216513 | 2 | $C_1$ | 1635.19 | 99.34 |
| 276113 | 2 | $C_1$ | 1624.68 | 88.82 | 214316 | 1 | $C_1$ | 1635.20 | 99.34 |
| 191297 | 2 | $C_1$ | 1624.68 | 88.82 | 212549 | 2 | $C_1$ | 1635.20 | 99.34 |
| 260699 | 2 | $C_1$ | 1624.69 | 88.83 | 231335 | 2 | $C_1$ | 1635.20 | 99.34 |
| 269145 | 2 | $C_1$ | 1624.69 | 88.84 | 277266 | 2 | $C_1$ | 1635.20 | 99.35 |
| 227540 | 2 | $C_1$ | 1624.70 | 88.85 | 273423 | 2 | $C_1$ | 1635.20 | 99.35 |

|        |   |       |         |       |        |   |       |         |       |
|--------|---|-------|---------|-------|--------|---|-------|---------|-------|
| 282337 | 1 | $C_I$ | 1624.71 | 88.85 | 283057 | 2 | $C_I$ | 1635.21 | 99.35 |
| 266789 | 2 | $C_I$ | 1624.72 | 88.87 | 276307 | 2 | $C_I$ | 1635.21 | 99.35 |
| 285791 | 0 | $C_I$ | 1624.73 | 88.88 | 285063 | 1 | $C_I$ | 1635.21 | 99.36 |
| 204759 | 1 | $C_I$ | 1624.73 | 88.88 | 283880 | 1 | $C_I$ | 1635.22 | 99.37 |
| 284837 | 1 | $C_I$ | 1624.75 | 88.90 | 262982 | 2 | $C_I$ | 1635.23 | 99.37 |
| 275990 | 1 | $C_I$ | 1624.75 | 88.90 | 210916 | 2 | $C_I$ | 1635.23 | 99.37 |
| 282574 | 1 | $C_I$ | 1624.76 | 88.90 | 243863 | 1 | $C_I$ | 1635.23 | 99.37 |
| 277036 | 2 | $C_I$ | 1624.76 | 88.91 | 153535 | 2 | $C_I$ | 1635.23 | 99.38 |
| 282588 | 1 | $C_I$ | 1624.76 | 88.91 | 214710 | 2 | $C_I$ | 1635.23 | 99.38 |
| 282940 | 2 | $C_I$ | 1624.77 | 88.91 | 282883 | 1 | $C_I$ | 1635.24 | 99.39 |
| 282334 | 2 | $C_I$ | 1624.77 | 88.92 | 284057 | 1 | $C_I$ | 1635.25 | 99.40 |
| 266066 | 2 | $C_I$ | 1624.78 | 88.92 | 263183 | 2 | $C_I$ | 1635.26 | 99.40 |
| 237418 | 1 | $C_I$ | 1624.78 | 88.93 | 243854 | 2 | $C_I$ | 1635.26 | 99.40 |
| 285777 | 0 | $C_I$ | 1624.79 | 88.93 | 263851 | 1 | $C_I$ | 1635.26 | 99.40 |
| 284320 | 2 | $C_I$ | 1624.80 | 88.94 | 241566 | 2 | $C_I$ | 1635.26 | 99.40 |
| 255656 | 1 | $C_I$ | 1624.80 | 88.94 | 276410 | 2 | $C_I$ | 1635.27 | 99.41 |
| 282851 | 1 | $C_I$ | 1624.81 | 88.96 | 275757 | 1 | $C_I$ | 1635.27 | 99.42 |
| 262449 | 1 | $C_I$ | 1624.82 | 88.97 | 213236 | 2 | $C_I$ | 1635.27 | 99.42 |
| 268119 | 2 | $C_I$ | 1624.84 | 88.99 | 251850 | 1 | $C_I$ | 1635.28 | 99.42 |
| 266082 | 2 | $C_I$ | 1624.85 | 88.99 | 227575 | 2 | $C_I$ | 1635.28 | 99.43 |
| 276255 | 2 | $C_I$ | 1624.86 | 89.01 | 282541 | 2 | $C_I$ | 1635.28 | 99.43 |
| 250871 | 2 | $C_I$ | 1624.87 | 89.01 | 239908 | 2 | $C_I$ | 1635.29 | 99.43 |

|        |   |       |         |       |        |   |       |         |       |
|--------|---|-------|---------|-------|--------|---|-------|---------|-------|
| 204014 | 2 | $C_I$ | 1624.87 | 89.02 | 284700 | 2 | $C_I$ | 1635.29 | 99.44 |
| 269815 | 1 | $C_I$ | 1624.88 | 89.02 | 210879 | 2 | $C_I$ | 1635.29 | 99.44 |
| 269389 | 2 | $C_I$ | 1624.88 | 89.02 | 268554 | 2 | $C_I$ | 1635.30 | 99.44 |
| 284845 | 1 | $C_I$ | 1624.88 | 89.03 | 269689 | 2 | $C_I$ | 1635.30 | 99.45 |
| 276552 | 2 | $C_I$ | 1624.89 | 89.03 | 284375 | 2 | $C_I$ | 1635.32 | 99.46 |
| 285589 | 0 | $C_S$ | 1624.89 | 89.03 | 214271 | 1 | $C_I$ | 1635.32 | 99.46 |
| 262836 | 2 | $C_I$ | 1624.90 | 89.04 | 228517 | 2 | $C_I$ | 1635.32 | 99.46 |
| 237198 | 1 | $C_I$ | 1624.90 | 89.04 | 248478 | 1 | $C_I$ | 1635.32 | 99.47 |
| 285582 | 0 | $C_I$ | 1624.90 | 89.04 | 229099 | 2 | $C_I$ | 1635.33 | 99.47 |
| 283681 | 1 | $C_I$ | 1624.93 | 89.08 | 182253 | 2 | $C_I$ | 1635.33 | 99.47 |
| 269751 | 2 | $C_I$ | 1624.94 | 89.08 | 278980 | 1 | $C_I$ | 1635.33 | 99.47 |
| 284637 | 1 | $C_I$ | 1624.94 | 89.09 | 226825 | 2 | $C_I$ | 1635.33 | 99.48 |
| 210867 | 2 | $C_I$ | 1624.96 | 89.10 | 263107 | 2 | $C_I$ | 1635.33 | 99.48 |
| 280795 | 2 | $C_I$ | 1624.97 | 89.11 | 254902 | 2 | $C_I$ | 1635.34 | 99.48 |
| 268704 | 1 | $C_I$ | 1624.98 | 89.12 | 207354 | 2 | $C_I$ | 1635.34 | 99.48 |
| 231194 | 2 | $C_I$ | 1624.98 | 89.13 | 213122 | 2 | $C_I$ | 1635.34 | 99.49 |
| 212133 | 2 | $C_I$ | 1624.99 | 89.13 | 204107 | 2 | $C_I$ | 1635.34 | 99.49 |
| 285112 | 1 | $C_I$ | 1624.99 | 89.13 | 207039 | 2 | $C_I$ | 1635.36 | 99.50 |
| 212218 | 2 | $C_I$ | 1624.99 | 89.14 | 278998 | 1 | $C_I$ | 1635.36 | 99.50 |
| 284767 | 1 | $C_I$ | 1624.99 | 89.14 | 248183 | 2 | $C_I$ | 1635.36 | 99.50 |
| 252947 | 1 | $C_I$ | 1625.01 | 89.15 | 251647 | 1 | $C_I$ | 1635.36 | 99.50 |
| 278424 | 1 | $C_I$ | 1625.01 | 89.15 | 242655 | 2 | $C_I$ | 1635.36 | 99.51 |



|        |   |       |         |       |        |   |       |         |       |
|--------|---|-------|---------|-------|--------|---|-------|---------|-------|
| 240233 | 2 | $C_1$ | 1625.02 | 89.17 | 285065 | 1 | $C_1$ | 1635.36 | 99.51 |
| 285394 | 1 | $C_2$ | 1625.03 | 89.17 | 276521 | 1 | $C_1$ | 1635.37 | 99.51 |
| 211190 | 1 | $C_1$ | 1625.03 | 89.18 | 207630 | 1 | $C_1$ | 1635.37 | 99.51 |
| 270923 | 2 | $C_1$ | 1625.03 | 89.18 | 109172 | 2 | $C_1$ | 1635.37 | 99.51 |
| 277695 | 1 | $C_1$ | 1625.04 | 89.19 | 269404 | 2 | $C_1$ | 1635.37 | 99.52 |
| 210856 | 2 | $C_1$ | 1625.06 | 89.20 | 284184 | 2 | $C_1$ | 1635.37 | 99.52 |
| 274726 | 1 | $C_1$ | 1625.06 | 89.20 | 215142 | 2 | $C_1$ | 1635.38 | 99.52 |
| 273484 | 1 | $C_1$ | 1625.06 | 89.21 | 278654 | 2 | $C_1$ | 1635.38 | 99.53 |
| 235966 | 2 | $C_1$ | 1625.06 | 89.21 | 235732 | 2 | $C_1$ | 1635.39 | 99.53 |
| 214856 | 1 | $C_1$ | 1625.06 | 89.21 | 234794 | 2 | $C_1$ | 1635.39 | 99.54 |
| 243850 | 1 | $C_1$ | 1625.07 | 89.21 | 267243 | 1 | $C_1$ | 1635.41 | 99.56 |
| 236355 | 1 | $C_1$ | 1625.08 | 89.23 | 269044 | 2 | $C_1$ | 1635.41 | 99.56 |
| 250887 | 2 | $C_1$ | 1625.08 | 89.23 | 278390 | 1 | $C_2$ | 1635.42 | 99.56 |
| 172385 | 2 | $C_1$ | 1625.09 | 89.24 | 282635 | 2 | $C_1$ | 1635.42 | 99.56 |
| 214123 | 1 | $C_1$ | 1625.09 | 89.24 | 273488 | 1 | $C_1$ | 1635.42 | 99.57 |
| 236687 | 2 | $C_1$ | 1625.10 | 89.24 | 274054 | 2 | $C_1$ | 1635.42 | 99.57 |
| 269755 | 2 | $C_1$ | 1625.10 | 89.25 | 212041 | 2 | $C_1$ | 1635.42 | 99.57 |
| 252786 | 2 | $C_1$ | 1625.10 | 89.25 | 236783 | 2 | $C_1$ | 1635.42 | 99.57 |
| 213895 | 1 | $C_1$ | 1625.11 | 89.25 | 267283 | 2 | $C_1$ | 1635.42 | 99.57 |
| 281548 | 2 | $C_1$ | 1625.11 | 89.25 | 229692 | 2 | $C_1$ | 1635.43 | 99.58 |
| 282953 | 2 | $C_1$ | 1625.11 | 89.25 | 254029 | 2 | $C_1$ | 1635.43 | 99.58 |
| 207198 | 2 | $C_1$ | 1625.12 | 89.27 | 193183 | 2 | $C_1$ | 1635.44 | 99.58 |

|        |   |       |         |       |        |   |       |         |       |
|--------|---|-------|---------|-------|--------|---|-------|---------|-------|
| 268661 | 1 | $C_I$ | 1625.12 | 89.27 | 235979 | 2 | $C_I$ | 1635.44 | 99.58 |
| 251048 | 2 | $C_I$ | 1625.13 | 89.27 | 211339 | 2 | $C_I$ | 1635.44 | 99.58 |
| 228727 | 1 | $C_I$ | 1625.13 | 89.27 | 237994 | 2 | $C_I$ | 1635.44 | 99.59 |
| 247123 | 2 | $C_I$ | 1625.13 | 89.28 | 222878 | 1 | $C_I$ | 1635.44 | 99.59 |
| 271684 | 1 | $C_I$ | 1625.14 | 89.28 | 277303 | 2 | $C_I$ | 1635.44 | 99.59 |
| 283403 | 1 | $C_I$ | 1625.14 | 89.29 | 274063 | 2 | $C_I$ | 1635.44 | 99.59 |
| 281333 | 1 | $C_S$ | 1625.15 | 89.29 | 213921 | 1 | $C_I$ | 1635.45 | 99.59 |
| 280988 | 2 | $C_I$ | 1625.15 | 89.30 | 248954 | 2 | $C_I$ | 1635.45 | 99.60 |
| 212227 | 2 | $C_I$ | 1625.16 | 89.30 | 273889 | 2 | $C_I$ | 1635.46 | 99.60 |
| 214185 | 2 | $C_I$ | 1625.18 | 89.33 | 277692 | 2 | $C_I$ | 1635.46 | 99.61 |
| 277064 | 1 | $C_I$ | 1625.20 | 89.34 | 204611 | 2 | $C_I$ | 1635.46 | 99.61 |
| 282450 | 2 | $C_I$ | 1625.20 | 89.35 | 283973 | 1 | $C_I$ | 1635.46 | 99.61 |
| 285703 | 0 | $C_I$ | 1625.23 | 89.38 | 262964 | 2 | $C_I$ | 1635.47 | 99.61 |
| 219868 | 1 | $C_I$ | 1625.23 | 89.38 | 239989 | 2 | $C_I$ | 1635.47 | 99.62 |
| 272912 | 1 | $C_I$ | 1625.24 | 89.39 | 237595 | 2 | $C_I$ | 1635.47 | 99.62 |
| 227585 | 1 | $C_I$ | 1625.25 | 89.40 | 222919 | 2 | $C_I$ | 1635.48 | 99.62 |
| 243790 | 2 | $C_I$ | 1625.26 | 89.40 | 198346 | 2 | $C_I$ | 1635.48 | 99.62 |
| 267156 | 2 | $C_I$ | 1625.28 | 89.43 | 214709 | 2 | $C_I$ | 1635.48 | 99.63 |
| 285412 | 1 | $C_I$ | 1625.31 | 89.45 | 278867 | 1 | $C_I$ | 1635.49 | 99.63 |
| 275173 | 2 | $C_I$ | 1625.31 | 89.46 | 278651 | 1 | $C_I$ | 1635.49 | 99.63 |
| 227411 | 2 | $C_I$ | 1625.32 | 89.46 | 282435 | 2 | $C_I$ | 1635.49 | 99.64 |
| 269224 | 2 | $C_I$ | 1625.32 | 89.47 | 229838 | 2 | $C_I$ | 1635.50 | 99.65 |

|        |   |       |         |       |        |   |       |         |       |
|--------|---|-------|---------|-------|--------|---|-------|---------|-------|
| 275190 | 2 | $C_I$ | 1625.34 | 89.48 | 282159 | 1 | $C_I$ | 1635.50 | 99.65 |
| 265648 | 2 | $C_I$ | 1625.36 | 89.51 | 197567 | 2 | $C_I$ | 1635.50 | 99.65 |
| 243103 | 2 | $C_I$ | 1625.36 | 89.51 | 285273 | 1 | $C_I$ | 1635.50 | 99.65 |
| 276513 | 2 | $C_I$ | 1625.37 | 89.51 | 188755 | 2 | $C_I$ | 1635.52 | 99.66 |
| 231208 | 1 | $C_I$ | 1625.37 | 89.52 | 284388 | 2 | $C_I$ | 1635.52 | 99.66 |
| 251605 | 2 | $C_I$ | 1625.39 | 89.53 | 214729 | 2 | $C_I$ | 1635.52 | 99.66 |
| 188790 | 2 | $C_I$ | 1625.39 | 89.54 | 275661 | 1 | $C_I$ | 1635.52 | 99.67 |
| 285203 | 2 | $C_I$ | 1625.39 | 89.54 | 235976 | 2 | $C_I$ | 1635.53 | 99.68 |
| 212200 | 1 | $C_I$ | 1625.40 | 89.54 | 276270 | 2 | $C_I$ | 1635.54 | 99.68 |
| 282592 | 1 | $C_I$ | 1625.41 | 89.55 | 281805 | 2 | $C_I$ | 1635.56 | 99.71 |
| 254222 | 1 | $C_I$ | 1625.41 | 89.55 | 247637 | 1 | $C_I$ | 1635.56 | 99.71 |
| 263321 | 2 | $C_I$ | 1625.43 | 89.58 | 212894 | 2 | $C_I$ | 1635.57 | 99.71 |
| 281355 | 1 | $C_I$ | 1625.44 | 89.59 | 284260 | 2 | $C_I$ | 1635.57 | 99.71 |
| 269158 | 2 | $C_I$ | 1625.44 | 89.59 | 283456 | 1 | $C_I$ | 1635.58 | 99.72 |
| 264249 | 2 | $C_I$ | 1625.44 | 89.59 | 275207 | 2 | $C_I$ | 1635.58 | 99.72 |
| 278780 | 1 | $C_I$ | 1625.46 | 89.60 | 235776 | 1 | $C_I$ | 1635.58 | 99.72 |
| 262973 | 2 | $C_I$ | 1625.47 | 89.61 | 231668 | 2 | $C_I$ | 1635.58 | 99.73 |
| 163333 | 2 | $C_I$ | 1625.47 | 89.61 | 237283 | 2 | $C_I$ | 1635.58 | 99.73 |
| 285168 | 2 | $C_I$ | 1625.47 | 89.62 | 281600 | 1 | $C_I$ | 1635.59 | 99.73 |
| 254602 | 2 | $C_I$ | 1625.47 | 89.62 | 284422 | 1 | $C_I$ | 1635.59 | 99.74 |
| 285782 | 0 | $C_S$ | 1625.48 | 89.62 | 278647 | 1 | $C_I$ | 1635.60 | 99.74 |
| 191613 | 2 | $C_I$ | 1625.48 | 89.62 | 250912 | 2 | $C_I$ | 1635.60 | 99.74 |

|        |   |       |         |       |        |   |       |         |       |
|--------|---|-------|---------|-------|--------|---|-------|---------|-------|
| 214895 | 2 | $C_I$ | 1625.49 | 89.64 | 224069 | 2 | $C_I$ | 1635.61 | 99.75 |
| 205603 | 1 | $C_I$ | 1625.49 | 89.64 | 216128 | 2 | $C_I$ | 1635.61 | 99.76 |
| 253690 | 1 | $C_I$ | 1625.53 | 89.68 | 282423 | 1 | $C_I$ | 1635.63 | 99.77 |
| 284384 | 1 | $C_I$ | 1625.54 | 89.69 | 272687 | 2 | $C_I$ | 1635.63 | 99.78 |
| 252770 | 2 | $C_I$ | 1625.56 | 89.70 | 197051 | 2 | $C_I$ | 1635.63 | 99.78 |
| 204591 | 1 | $C_I$ | 1625.56 | 89.71 | 152826 | 2 | $C_I$ | 1635.63 | 99.78 |
| 278584 | 1 | $C_I$ | 1625.58 | 89.72 | 202969 | 2 | $C_I$ | 1635.64 | 99.79 |
| 275454 | 2 | $C_I$ | 1625.58 | 89.72 | 265657 | 1 | $C_I$ | 1635.64 | 99.79 |
| 213579 | 2 | $C_I$ | 1625.58 | 89.72 | 267665 | 2 | $C_I$ | 1635.65 | 99.79 |
| 282918 | 2 | $C_I$ | 1625.61 | 89.76 | 284635 | 1 | $C_I$ | 1635.65 | 99.79 |
| 216618 | 2 | $C_I$ | 1625.62 | 89.77 | 265605 | 2 | $C_I$ | 1635.65 | 99.80 |
| 243170 | 2 | $C_I$ | 1625.63 | 89.78 | 275142 | 1 | $C_I$ | 1635.65 | 99.80 |
| 276250 | 2 | $C_I$ | 1625.64 | 89.78 | 265800 | 2 | $C_I$ | 1635.66 | 99.80 |
| 284281 | 1 | $C_S$ | 1625.65 | 89.80 | 254085 | 1 | $C_I$ | 1635.66 | 99.80 |
| 248431 | 1 | $C_I$ | 1625.65 | 89.80 | 266092 | 2 | $C_I$ | 1635.66 | 99.80 |
| 265580 | 2 | $C_I$ | 1625.65 | 89.80 | 270922 | 2 | $C_I$ | 1635.67 | 99.81 |
| 225898 | 1 | $C_I$ | 1625.66 | 89.80 | 269199 | 2 | $C_I$ | 1635.67 | 99.81 |
| 212089 | 2 | $C_I$ | 1625.66 | 89.80 | 280188 | 1 | $C_I$ | 1635.67 | 99.82 |
| 275182 | 2 | $C_I$ | 1625.68 | 89.82 | 226932 | 1 | $C_I$ | 1635.67 | 99.82 |
| 275181 | 2 | $C_I$ | 1625.68 | 89.83 | 282431 | 2 | $C_I$ | 1635.68 | 99.82 |
| 216185 | 2 | $C_I$ | 1625.69 | 89.84 | 252542 | 1 | $C_I$ | 1635.68 | 99.83 |
| 250279 | 1 | $C_I$ | 1625.69 | 89.84 | 229308 | 2 | $C_I$ | 1635.68 | 99.83 |

|        |   |       |         |       |        |   |       |         |       |
|--------|---|-------|---------|-------|--------|---|-------|---------|-------|
| 275668 | 1 | $C_I$ | 1625.69 | 89.84 | 247243 | 2 | $C_I$ | 1635.69 | 99.84 |
| 243284 | 1 | $C_I$ | 1625.70 | 89.85 | 176870 | 2 | $C_I$ | 1635.69 | 99.84 |
| 281318 | 1 | $C_I$ | 1625.70 | 89.85 | 227508 | 2 | $C_I$ | 1635.70 | 99.84 |
| 203381 | 2 | $C_I$ | 1625.70 | 89.85 | 207774 | 1 | $C_I$ | 1635.70 | 99.85 |
| 276428 | 2 | $C_I$ | 1625.70 | 89.85 | 269072 | 2 | $C_I$ | 1635.71 | 99.85 |
| 280482 | 1 | $C_I$ | 1625.71 | 89.85 | 228726 | 2 | $C_I$ | 1635.71 | 99.86 |
| 251631 | 1 | $C_I$ | 1625.71 | 89.86 | 126992 | 2 | $C_I$ | 1635.72 | 99.86 |
| 275152 | 1 | $C_I$ | 1625.71 | 89.86 | 270638 | 1 | $C_I$ | 1635.72 | 99.86 |
| 266053 | 2 | $C_I$ | 1625.72 | 89.86 | 264905 | 2 | $C_I$ | 1635.72 | 99.86 |
| 203269 | 2 | $C_I$ | 1625.72 | 89.86 | 253795 | 2 | $C_I$ | 1635.72 | 99.87 |
| 213973 | 2 | $C_I$ | 1625.73 | 89.87 | 210862 | 2 | $C_I$ | 1635.72 | 99.87 |
| 213625 | 2 | $C_I$ | 1625.73 | 89.87 | 285609 | 0 | $C_I$ | 1635.74 | 99.88 |
| 268656 | 1 | $C_I$ | 1625.75 | 89.89 | 205631 | 2 | $C_I$ | 1635.74 | 99.88 |
| 214945 | 2 | $C_I$ | 1625.75 | 89.90 | 205626 | 2 | $C_I$ | 1635.74 | 99.89 |
| 211275 | 1 | $C_I$ | 1625.75 | 89.90 | 262341 | 2 | $C_I$ | 1635.74 | 99.89 |
| 236218 | 2 | $C_I$ | 1625.76 | 89.90 | 214151 | 2 | $C_I$ | 1635.75 | 99.89 |
| 284930 | 2 | $C_I$ | 1625.77 | 89.92 | 227551 | 2 | $C_I$ | 1635.76 | 99.90 |
| 226755 | 2 | $C_I$ | 1625.78 | 89.93 | 242733 | 2 | $C_I$ | 1635.76 | 99.90 |
| 284195 | 2 | $C_I$ | 1625.78 | 89.93 | 216155 | 2 | $C_I$ | 1635.76 | 99.91 |
| 275864 | 1 | $C_S$ | 1625.78 | 89.93 | 253242 | 2 | $C_I$ | 1635.76 | 99.91 |
| 247140 | 1 | $C_I$ | 1625.79 | 89.94 | 268699 | 2 | $C_I$ | 1635.77 | 99.92 |
| 285262 | 1 | $C_I$ | 1625.79 | 89.94 | 207256 | 2 | $C_I$ | 1635.78 | 99.93 |

|        |   |       |         |       |        |   |       |         |        |
|--------|---|-------|---------|-------|--------|---|-------|---------|--------|
| 228863 | 2 | $C_I$ | 1625.80 | 89.95 | 271917 | 2 | $C_I$ | 1635.78 | 99.93  |
| 281416 | 1 | $C_I$ | 1625.83 | 89.97 | 274021 | 2 | $C_I$ | 1635.79 | 99.93  |
| 214281 | 2 | $C_I$ | 1625.83 | 89.97 | 283001 | 2 | $C_I$ | 1635.79 | 99.94  |
| 273430 | 1 | $C_I$ | 1625.83 | 89.98 | 272881 | 1 | $C_I$ | 1635.79 | 99.94  |
| 282079 | 1 | $C_I$ | 1625.84 | 89.98 | 267408 | 2 | $C_I$ | 1635.79 | 99.94  |
| 276252 | 2 | $C_I$ | 1625.85 | 89.99 | 282231 | 1 | $C_I$ | 1635.79 | 99.94  |
| 269456 | 1 | $C_I$ | 1625.86 | 90.01 | 266295 | 2 | $C_I$ | 1635.79 | 99.94  |
| 280815 | 1 | $C_I$ | 1625.86 | 90.01 | 232468 | 1 | $C_I$ | 1635.81 | 99.96  |
| 211340 | 1 | $C_I$ | 1625.87 | 90.01 | 280665 | 2 | $C_I$ | 1635.82 | 99.97  |
| 212402 | 2 | $C_I$ | 1625.88 | 90.03 | 226900 | 1 | $C_I$ | 1635.82 | 99.97  |
| 234681 | 1 | $C_I$ | 1625.88 | 90.03 | 277584 | 2 | $C_I$ | 1635.82 | 99.97  |
| 283441 | 2 | $C_I$ | 1625.93 | 90.07 | 285093 | 1 | $C_I$ | 1635.83 | 99.97  |
| 282114 | 2 | $C_I$ | 1625.94 | 90.08 | 284515 | 1 | $C_I$ | 1635.83 | 99.97  |
| 277760 | 2 | $C_I$ | 1625.94 | 90.08 | 214461 | 2 | $C_I$ | 1635.83 | 99.98  |
| 276182 | 1 | $C_I$ | 1625.94 | 90.09 | 226734 | 2 | $C_I$ | 1635.83 | 99.98  |
| 221193 | 1 | $C_I$ | 1625.95 | 90.09 | 262492 | 1 | $C_I$ | 1635.83 | 99.98  |
| 275449 | 2 | $C_I$ | 1625.95 | 90.10 | 269830 | 2 | $C_I$ | 1635.84 | 99.98  |
| 213759 | 2 | $C_I$ | 1625.95 | 90.10 | 263572 | 2 | $C_I$ | 1635.84 | 99.98  |
| 257837 | 1 | $C_I$ | 1625.96 | 90.10 | 282887 | 2 | $C_I$ | 1635.84 | 99.99  |
| 273981 | 1 | $C_I$ | 1625.96 | 90.11 | 276139 | 2 | $C_I$ | 1635.85 | 99.99  |
| 213582 | 2 | $C_I$ | 1625.96 | 90.11 | 254899 | 2 | $C_I$ | 1635.85 | 99.99  |
| 283267 | 2 | $C_I$ | 1625.98 | 90.12 | 242787 | 1 | $C_I$ | 1635.85 | 100.00 |

|        |   |       |         |       |        |   |       |         |        |
|--------|---|-------|---------|-------|--------|---|-------|---------|--------|
| 266501 | 2 | $C_1$ | 1625.98 | 90.12 | 275409 | 2 | $C_1$ | 1635.85 | 100.00 |
| 253314 | 1 | $C_1$ | 1625.98 | 90.12 | 284734 | 1 | $C_1$ | 1635.86 | 100.00 |
| 285086 | 2 | $C_1$ | 1625.98 | 90.13 | 221324 | 1 | $C_1$ | 1635.86 | 100.00 |
| 269761 | 2 | $C_1$ | 1626.00 | 90.15 | 266054 | 2 | $C_1$ | 1635.86 | 100.00 |
| 250865 | 2 | $C_1$ | 1626.01 | 90.15 | 229077 | 2 | $C_1$ | 1635.86 | 100.00 |

## 2. Relative optimized energies of hexa-anion $C_{100}^{6-}$ and $Dy_2@C_{100}$ at B3LYP/SLC&6-31G(d) level.

Geometries were fully optimized by hybrid density functional calculations at the B3LYP<sup>S4</sup> level for the most stable  $C_{100}^{6-}$  cages and  $Dy_2@C_{100}$ . The split-valence d-polarized 6-31G(d) basis set was used for carbon. As for the dysprosium, the quasi-relativistic pseudo-potential (SLC) with corresponding valence basis set (7s6p5d)/[5s4p3d] developed by the Stuttgart team<sup>S5</sup> was used. All the results are collected in Table S4. All the calculations performed in Gaussian 03<sup>S6</sup>.

**Table S3.** Optimized energies of all the hexa-anion and  $Dy_2@C_{100}$  at B3LYP level.

| $C_{100}$ |    |          | Hexa-anion             | Hexa-anion | $Dy_2@C_{100}$         | $Dy_2@C_{100}$ |
|-----------|----|----------|------------------------|------------|------------------------|----------------|
| spiralID  | PA | Symmetry | $\Delta E$<br>kcal/mol | Gap<br>eV  | $\Delta E$<br>kcal/mol | Gap<br>eV      |
| 285913    | 0  | $D_5$    | 0.00                   | 2.50       | 1.85                   | 0.70           |
| 285793    | 0  | $C_2$    | 22.27                  | 1.77       | 4.95                   | 1.20           |
| 285864    | 0  | $C_2$    | 20.78                  | 1.69       | 0.00                   | 1.16           |
| 285858    | 0  | $D_{2d}$ | 25.98                  | 1.91       | 17.06                  | 0.84           |
| 285402    | 1  | $C_2$    | 38.32                  | 1.98       | 43.87                  | 0.80           |
| 276180    | 2  | $C_2$    | 58.00                  | 2.50       | 52.21                  | 0.67           |
| 285353    | 2  | $C_2$    | 59.37                  | 1.50       | 75.46                  | 1.23           |
| 285366    | 2  | $C_{2v}$ | 61.34                  | 1.63       | 51.36                  | 0.76           |
| 282347    | 2  | $C_2$    | 62.02                  | 1.96       | 42.27                  | 0.85           |
| 283433    | 2  | $C_s$    | 61.81                  | 1.78       | 40.30                  | 1.10           |

|        |   |          |        |      |        |      |
|--------|---|----------|--------|------|--------|------|
| 277326 | 2 | $D_2$    | 61.76  | 1.85 | 38.01  | 0.99 |
| 243782 | 2 | $D_2$    | 89.22  | 1.92 | 65.34  | 0.66 |
| 284020 | 2 | $D_2$    | 94.84  | 1.51 | 52.92  | 0.96 |
| 284029 | 2 | $D_{2d}$ | 93.94  | 1.57 | 61.38  | 0.91 |
| 217626 | 2 | $D_2$    | 157.86 | 1.25 | 96.29  | 0.93 |
| 283876 | 2 | $D_2$    | 109.45 | 1.64 | 86.99  | 0.59 |
| 204140 | 2 | $D_2$    | 115.47 | 0.79 | 50.02  | 1.85 |
| 242740 | 2 | $D_2$    | 138.13 | 1.44 | 91.77  | 0.89 |
| 277774 | 2 | $D_2$    | 110.61 | 1.34 | 66.44  | 1.04 |
| 277791 | 2 | $D_2$    | 121.22 | 2.04 | 97.08  | 0.61 |
| 283900 | 2 | $D_2$    | 148.18 | 2.70 | 128.09 | 0.61 |
| 285145 | 2 | $D_2$    | 218.79 | 1.07 | 154.14 | 0.94 |

### 3. The energy levels of 285913: $D_5$ species and 285864: $C_2$ species of $Dy_2@C_{100}$

Energy levels of 285913: $D_5$  species and 285864: $C_2$  species of  $Dy_2@C_{100}$  are computed in Gaussian 03 program. The geometry optimizations are performed at B3LYP/SLC&6-31G(d) without any restraint. Then the pseudo-potential SDD with corresponding valence basis set is used for Dy atom and 3-21G basis set is used for carbon atom. Figure S2 shows the important energy levels of the both two isomers. The SOMO-LUMO gaps computed with this method are similar with the previous calculated HOMO-LUMO gaps at B3LYP/SLC&6-31G(d) level, 1.16eV and 0.70eV for 285864: $C_2$  and 285913: $D_5$  respectively. And the  $\alpha$ - and  $\beta$ -spin energy levels of  $Dy_2@C_{100}$  are split by the existence of unpaired  $f$  electrons on each  $Dy(4f^{10}5d^06s^2)$  atom.



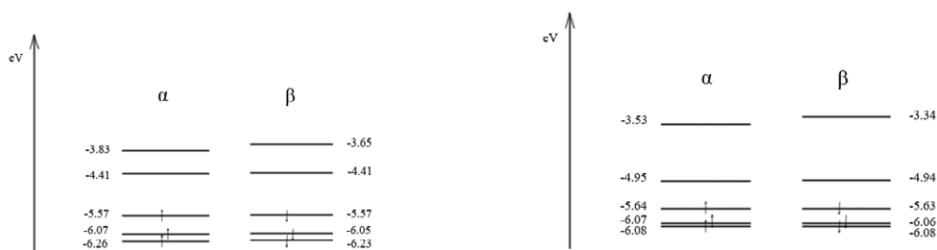

Figure S1. Energy levels of 285864: $C_2$  species (left) and 285913: $D_5$  species (right).

#### 4. Optimized Cartesian coordinates of the 285913: $D_5$ species of $Dy_2@C_{100}$ at

##### B3LYP/SLC&6-31g(d) level.

285913: $D_5$

xyz file:

|   |           |           |           |
|---|-----------|-----------|-----------|
| C | 1.810347  | 4.030545  | 0.370847  |
| C | 2.459499  | 3.818925  | -0.875430 |
| C | 1.689020  | 3.556715  | -2.074871 |
| C | 2.423427  | 2.650778  | -2.895057 |
| C | 1.731469  | 1.675727  | -3.655059 |
| C | 2.403230  | 0.434454  | -3.848133 |
| C | 1.663154  | -0.788479 | -3.961389 |
| C | 2.418359  | -1.827629 | -3.352165 |
| C | 1.752564  | -2.866300 | -2.654920 |
| C | 2.453748  | -3.425150 | -1.545885 |
| C | 1.737431  | -3.911956 | -0.418814 |
| C | 2.503794  | -3.644949 | 0.754325  |
| C | 1.845546  | -3.326646 | 1.971324  |
| C | 2.542671  | -2.449742 | 2.843922  |
| C | 1.811853  | -1.536180 | 3.664523  |
| C | 2.558778  | -0.316168 | 3.766915  |
| C | 1.880145  | 0.926023  | 3.844018  |
| C | 2.545479  | 2.037488  | 3.263170  |
| C | 1.783220  | 3.104657  | 2.654622  |
| C | 2.511678  | 3.597761  | 1.522926  |
| C | 0.371847  | 4.132218  | 0.409342  |
| C | -0.333061 | 3.815836  | 1.630354  |
| C | 0.396355  | 3.150778  | 2.719607  |
| C | -0.270194 | 2.143098  | 3.553695  |
| C | 0.442362  | 0.944264  | 3.975159  |

|   |           |           |           |
|---|-----------|-----------|-----------|
| C | -0.287276 | -0.311287 | 4.055212  |
| C | 0.413463  | -1.561854 | 3.751848  |
| C | -0.277424 | -2.646459 | 3.065143  |
| C | 0.406077  | -3.424444 | 2.050277  |
| C | -0.350006 | -3.883741 | 0.882254  |
| C | 0.328083  | -3.989246 | -0.398959 |
| C | -0.369020 | -3.665380 | -1.630262 |
| C | 0.313634  | -2.950316 | -2.701171 |
| C | -0.434389 | -1.976540 | -3.494960 |
| C | 0.259225  | -0.807759 | -4.003099 |
| C | -0.422102 | 0.483675  | -4.071900 |
| C | 0.292283  | 1.718914  | -3.726783 |
| C | -0.424683 | 2.777415  | -3.042193 |
| C | 0.299192  | 3.613177  | -2.087028 |
| C | -0.360411 | 4.089728  | -0.862680 |
| C | -1.746310 | 4.027239  | -0.825481 |
| C | -2.473627 | 3.912281  | 0.401469  |
| C | -1.772082 | 3.719847  | 1.616639  |
| C | -2.426369 | 2.931214  | 2.602371  |
| C | -1.664574 | 2.112329  | 3.517711  |
| C | -2.407709 | 0.928330  | 3.788265  |
| C | -1.726321 | -0.299897 | 3.973759  |
| C | -2.411736 | -1.471947 | 3.537399  |
| C | -1.685333 | -2.596621 | 3.039732  |
| C | -2.447579 | -3.198545 | 2.000476  |
| C | -1.789251 | -3.774453 | 0.884439  |
| C | -2.494727 | -3.720279 | -0.352234 |
| C | -1.775959 | -3.596455 | -1.572679 |
| C | -2.536425 | -2.781213 | -2.467521 |
| C | -1.872940 | -1.916196 | -3.376559 |
| C | -2.558661 | -0.719123 | -3.708614 |
| C | -1.815539 | 0.476783  | -3.984036 |
| C | -2.552815 | 1.599544  | -3.479243 |
| C | -1.862569 | 2.711200  | -2.935877 |
| C | -2.517327 | 3.397787  | -1.879040 |
| C | -3.726608 | 2.921380  | -1.306623 |
| C | -3.702319 | 3.235976  | 0.118628  |
| C | -4.292564 | 2.365607  | 1.062350  |
| C | -3.652570 | 2.262835  | 2.336654  |
| C | -3.655273 | 1.012951  | 3.074303  |
| C | -4.278370 | -0.142947 | 2.547112  |
| C | -3.657427 | -1.399508 | 2.828364  |
| C | -3.695653 | -2.480960 | 1.872747  |
| C | -4.371845 | -2.359282 | 0.616545  |

|    |           |           |           |
|----|-----------|-----------|-----------|
| C  | -3.750375 | -3.011509 | -0.493741 |
| C  | -3.769371 | -2.427492 | -1.820912 |
| C  | -4.411457 | -1.171511 | -2.084128 |
| C  | -3.780171 | -0.339557 | -3.053369 |
| C  | -3.768365 | 1.108882  | -2.912034 |
| C  | -4.363958 | 1.737871  | -1.785779 |
| C  | -5.053421 | 0.900698  | -0.834366 |
| C  | -5.002509 | 1.206393  | 0.570488  |
| C  | -5.020938 | -0.029439 | 1.303363  |
| C  | -5.101323 | -1.123268 | 0.353383  |
| C  | -5.114053 | -0.537372 | -0.983198 |
| C  | 3.677079  | 3.097091  | -0.975154 |
| C  | 3.665475  | 2.363869  | -2.232430 |
| C  | 4.272539  | 1.092531  | -2.336835 |
| C  | 3.642370  | 0.140729  | -3.197493 |
| C  | 3.669082  | -1.271057 | -2.891338 |
| C  | 4.328553  | -1.772131 | -1.731644 |
| C  | 3.711272  | -2.885529 | -1.080326 |
| C  | 3.745981  | -3.030593 | 0.358969  |
| C  | 4.409769  | -2.074701 | 1.203605  |
| C  | 3.776885  | -1.810255 | 2.453400  |
| C  | 3.775472  | -0.477682 | 3.034309  |
| C  | 4.384096  | 0.621363  | 2.362011  |
| C  | 3.754127  | 1.889952  | 2.523777  |
| C  | 3.732639  | 2.860865  | 1.434927  |
| C  | 4.319146  | 2.558956  | 0.182979  |
| C  | 5.016856  | 1.302770  | 0.045475  |
| C  | 5.005583  | 0.578867  | -1.195065 |
| C  | 5.072758  | -0.834352 | -0.900693 |
| C  | 5.120022  | -0.983700 | 0.550181  |
| C  | 5.077436  | 0.349352  | 1.124246  |
| Dy | -2.700414 | -0.391713 | -0.053331 |
| Dy | 2.703134  | -0.388274 | 0.019477  |

**5. Charge Distribution of the 285913:D<sub>5</sub> species of Dy<sub>2</sub>@C<sub>100</sub> at B3LYP/CEP-31G&3-21G level.**

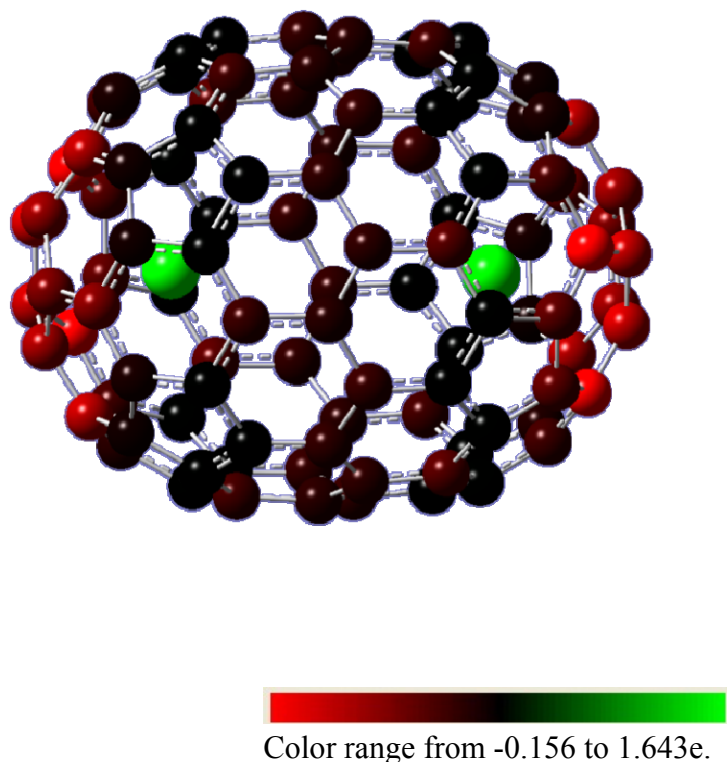

**Figure S2.** The Charge Distribution of  $\text{Dy}_2@285913:D_5$  species.

From the Charge Distribution Map, metal atoms transfer the electrons to the two top carbons, which may have strong electrostatic interactions with the positive charged metal.

## 6. Detailed information of $^{13}\text{C}$ NMR computation.

The  $285913:D_5$  species of  $\text{Dy}_2@C_{100}$  is expected to show ten lines in  $^{13}\text{C}$  NMR duo to the free motion of Dy in fullerene cage and is also greatly dependent on the temperature. Employing the gauge-independent atomic orbital (GIAO)<sup>S7</sup> method at the B3LYP level of theory in Gaussian 03, here we calculated the diamagnetic  $\delta_{\text{dia}}$  values of the  $\text{Dy}_2@C_{100}$ , which is one important factor of the chemical shifts in the  $^{13}\text{C}$  NMR spectrum of  $\text{Dy}_2@C_{100}$ <sup>S8</sup>. Chemical shifts were calculated relative to  $C_{60}$  using

the experimental value for C<sub>60</sub> (142.5 ppm) and converted to the TMS (tetramethylsilane) scale.

**Table S3.** The diamagnetic  $\delta_{\text{dia}}$  values of <sup>13</sup>C NMR chemical shifts (ppm) of endohedral metallofullerene Dy<sub>2</sub>@285913:D<sub>5</sub> species.

| $\delta$ | intensity |
|----------|-----------|
| 105.39   | 1         |
| 111.95   | 1         |
| 116.96   | 1         |
| 119.84   | 1         |
| 119.88   | 1         |
| 120.36   | 1         |
| 125.68   | 1         |
| 126.92   | 1         |
| 132.47   | 1         |
| 137.69   | 1         |

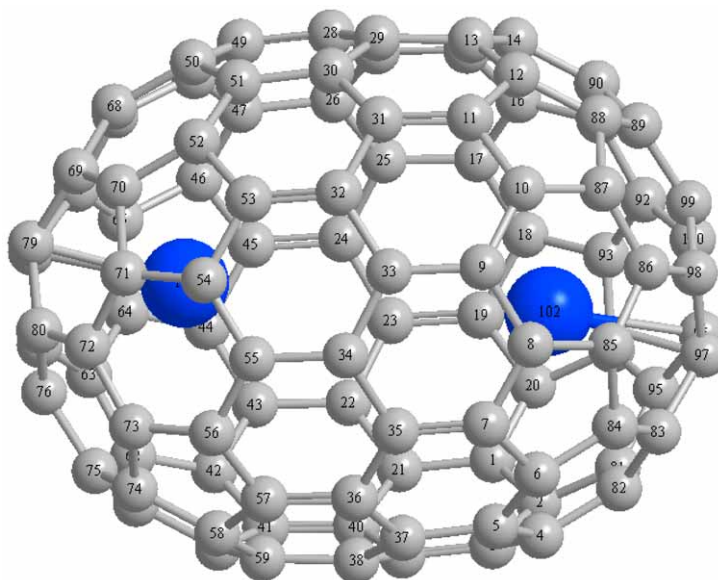

**Figure S3.** The optimized structure of Dy<sub>2</sub>@285913:D<sub>5</sub> species at B3LYP level.

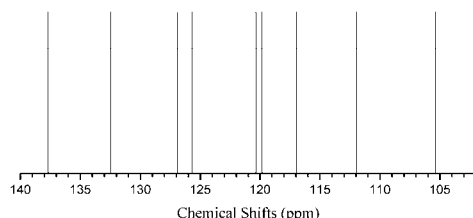

**Figure S4.** The simulated  $^{13}\text{C}$  NMR spectrum of the diamagnetic  $\delta_{\text{dia}}$  values of  $\text{Dy}_2@285913:D_5$ . The signals at 119.84 and 119.88 ppm are combined into a signal with double line width due to the small space.

### 7. The simulated IR spectrum of $\text{Dy}_2@285913:D_5$ species.

The vibrational frequencies and infrared (IR) absorption intensities of  $\text{Dy}_2@285913:D_5$  species have been computed by harmonic vibrational analysis. Figure S3 depicts the simulated IR spectrum of  $\text{Dy}_2@285913:D_5$  species. The IR spectrum of the  $285913:D_5$  species with the highest vibrational frequency lower than  $1600\text{ cm}^{-1}$  consists roughly of three wide-bands. The two wide bands, one ranging from  $950\text{ cm}^{-1}$  to  $1600\text{ cm}^{-1}$  and another from  $600\text{ cm}^{-1}$  to  $700\text{ cm}^{-1}$ , are mainly attributed to vibrational modes of the  $\text{C}_{100}^{6-}$  cage. The latter can be a fingerprint for characterization the  $285913:D_5$  species of  $\text{Dy}_2@C_{100}$ . Because of the graphitization upon decomposition of the di-metallofullerenes, the real vibrational modes of the endohedral metallofullerene ranging from  $850$  to  $1260\text{ cm}^{-1}$  may be covered up.<sup>S9</sup> The highest absorption intensity of  $1056\text{ cm}^{-1}$  is attributed to the C-C stretching frequency of carbon cage, due to the high symmetry of the structure. The weaker band ranging from  $200$  to  $300\text{ cm}^{-1}$  is on account of vibrations of the encapsulated cations.

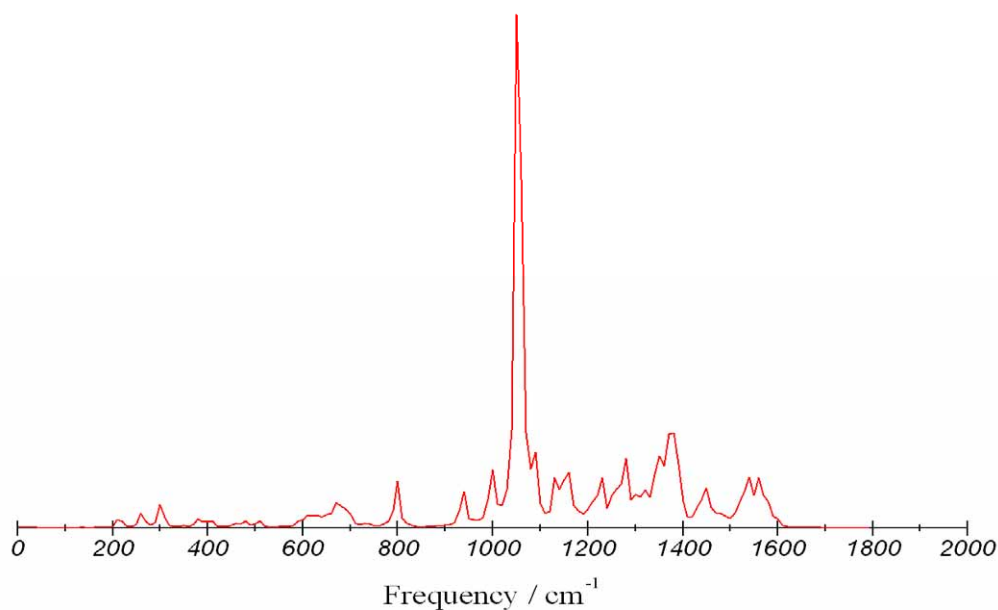

**Figure S5.** The simulated IR spectrum of Dy<sub>2</sub>@285913:D<sub>5</sub> species.

**References for *electronic supplementary information*:**

- S1 H. W. Kroto, *Nature.*, 1987, **329**, 529–531.
- S2 P. W. Fowler, D. E. Manolopoulos, *An Atlas of Fullerenes.*, Oxford, 1995.
- S3 M. J. S. Dewar, E. Zebisch, E. F. Healy, J. J. P. Stewart, *J. Am. Chem. Soc.*, 1985, **107**, 3902-3909.
- S4 a) A. D. Becke, *Phys. Rev. A.*, 1988, **38**, 3098-3100; b) C. Lee, W. Yang, R. G. Parr, *Phys. Rev. B.*, 1988, **37**, 785-789.
- S5 a) M. Dolg, H. Stoll, A. Savin, H. Preuss, *Theor. Chem. Account.*, 1989, **75**, 173-194; b) M. Dolg, H. Stoll, H. Preuss, *Theor. Chem. Account.*, 1993, **85**, 441-450.

- S6 Gaussian 03, Revision E.01, M. J. Frisch, G. W. Trucks, H. B. Schlegel, G. E. Scuseria, M. A. Robb, J. R. Cheeseman, J. A. Montgomery, Jr., T. Vreven, K. N. Kudin, J. C. Burant, J. M. Millam, S. S. Iyengar, J. Tomasi, V. Barone, B. Mennucci, M. Cossi, G. Scalmani, N. Rega, G. A. Petersson, H. Nakatsuji, M. Hada, M. Ehara, K. Toyota, R. Fukuda, J. Hasegawa, M. Ishida, T. Nakajima, Y. Honda, O. Kitao, H. Nakai, M. Klene, X. Li, J. E. Knox, H. P. Hratchian, J. B. Cross, V. Bakken, C. Adamo, J. Jaramillo, R. Gomperts, R. E. Stratmann, O. Yazyev, A. J. Austin, R. Cammi, C. Pomelli, J. W. Ochterski, P. Y. Ayala, K. Morokuma, G. A. Voth, P. Salvador, J. J. Dannenberg, V. G. Zakrzewski, S. Dapprich, A. D. Daniels, M. C. Strain, O. Farkas, D. K. Malick, A. D. Rabuck, K. Raghavachari, J. B. Foresman, J. V. Ortiz, Q. Cui, A. G. Baboul, S. Clifford, J. Cioslowski, B. B. Stefanov, G. Liu, A. Liashenko, P. Piskorz, I. Komaromi, R. L. Martin, D. J. Fox, T. Keith, M. A. Al-Laham, C. Y. Peng, A. Nanayakkara, M. Challacombe, P. M. W. Gill, B. Johnson, W. Chen, M. W. Wong, C. Gonzalez, J. A. Pople, Gaussian, Inc., Wallingford CT, 2004.
- S7 M. J. S. Dewar, E. Zoebisch, E. F. Healy, J. J. P. Stewart, *J. Am. Chem. Soc.*, 1985, **107**, 3902-3909.
- S8 M. Yamada, T. Wakahara, Y. Lian, T. Tsuchiya, T. Akasaka, M. Waelchli, N. Mizorogi, S. Nagase, K. M. Kadish, *J. Am. Chem. Soc.*, 2006, **128**, 1400-1401.
- S9 S. Yang, L. Dunsch, *Angew. Chem.*, 2006, *118*, 1321-1324; *Angew. Chem. Int. Ed.*, 2006, **45**, 1299-1302.
